# Supplementary material
Source: PubMed Central journal article supplement (PMC3336969)
Supplement: JCI45661sd.pdf [file JCI45661sd.pdf]

## Supplementary Figure 1

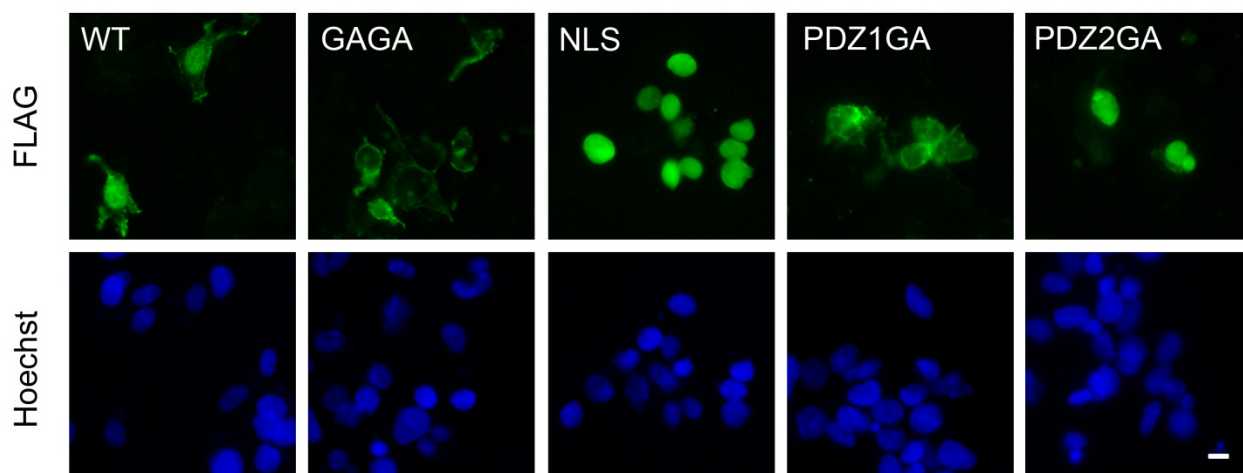

Supplementary Figure 1. HEK293 were transiently transfected with the indicated FLAG-tagged EBP50 plasmids for 6 h and were immunostained with mouse anti-FLAG (M2) antibody (green) and Hoechst 33342 reagent (blue).

## Supplementary Figure 2

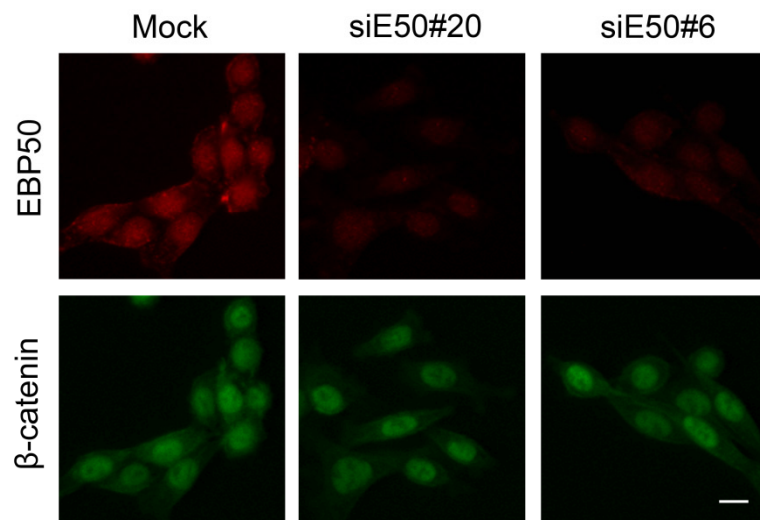

Supplementary Figure 2. Down-regulated EBP50 expression does not affect  $\beta$ -catenin expression in SW480 cells. Two independent EBP50 knockdown SW480 stable clones were processed for double immunofluorescence study using EBP50 (red) and  $\beta$ -catenin (green) antibodies. Scale bars: 10  $\mu$ m.

## Supplementary Figure 3

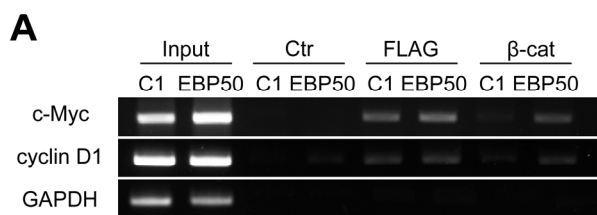

Supplementary Figure 3. SW480 cells stably expressing FLAG-dnTCF-1 were transfected with EGFP-C1 control vector (C1) or EGFP-tagged EBP50 expressing plasmid (E50). Twenty four hours later, the cells were then processed for ChIP assay using affinity purified rabbit anti-FLAG,  $\beta$ -catenin antibody, or a rabbit anti-podocalyxin antibody as a negative control (Ctr). Target c-Myc and cyclin D1 sequences were amplified by PCR.

## Supplementary Figure 4

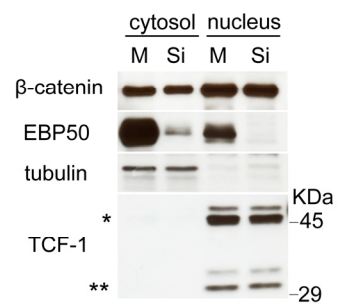

Supplementary Figure 4. Mock (M) and EBP50 knockdown (Si) Colo205 cells were homogenized with Dounce homogenizer (20 strokes with a tight pestle) and centrifuged at 700 g for 5 min to separate cytosol and nuclei. Equal fractions from the cytosolic and nuclear portions were loaded into SDS-PAGE and analyzed by Western blotting analysis for EBP50,  $\beta$ -catenin, and TCF-1. Tubulin serves as a cytosolic marker while TCF-1 itself as a nuclear marker. \* and \*\* indicate full-length and N-terminally truncated TCF-1, respectively.

## Supplementary Figure 5

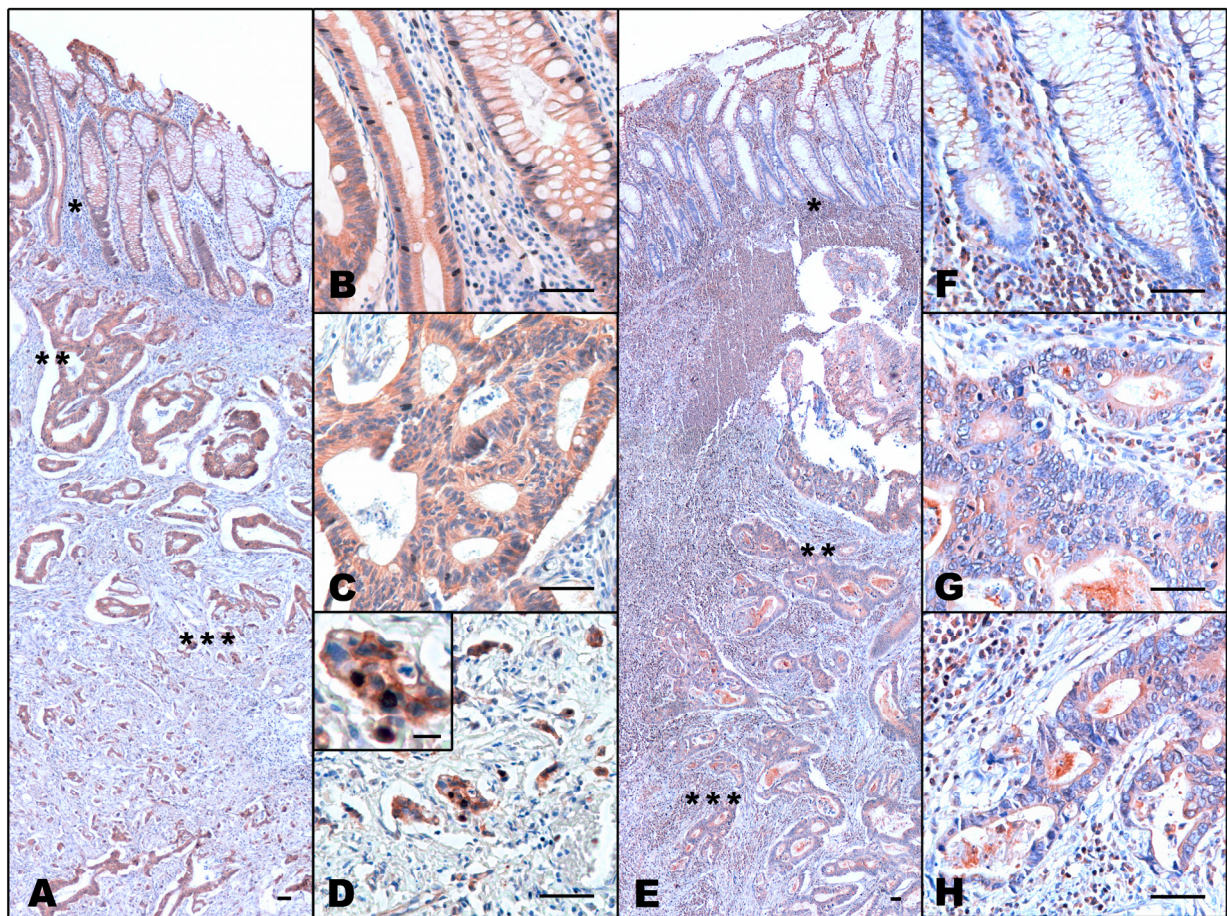

Supplementary Figure 5. (A)  $\beta$ -catenin immunostain displayed a similar increasing intensity and nuclear distribution pattern across the tumor to that seen for EBP50 staining shown in the analogous parts shown in Figure 8A. High magnification of areas \*, \*\*, and \*\*\* labelled in panel A showed  $\beta$ -catenin staining throughout the mucosal (B), submucosal (C), and deeper invasive portions (D) of the tumor. These regions are also correspondents of B, C, and D shown in Figure 8. (E) A CRC case showed membranous, cytosolic, but not any nuclear EBP50 staining at the invasive front despite the dysmorphic nuclear change. (F, G, H) High magnification of areas \*, \*\*, and \*\*\* labeled in panel E. Please note that there was still no EBP50 nuclear staining in the deeply invasive neoplastic glands in pericolonic soft tissue as shown in panel H. Scale bar, 50  $\mu$ m for all panels; 10  $\mu$ m for the insert in panel D.

Supplementary table 1. Chromosome location of 816 EBP50-binding sites sorted by number of TCF motif

\* indicates genes in which more than one discrete chromosome location were identified

| Gene Symbol              | Chromosome Location       | Length | number of TCF motif |
|--------------------------|---------------------------|--------|---------------------|
| PORCN*                   | chrX:48248761-48250134    | 1373   | 7                   |
| FLJ11184                 | chr4:164631334-164632821  | 1487   | 6                   |
| SI                       | chr3:166282909-166283664  | 755    | 6                   |
| FUT8                     | chr14:65204215-65206003   | 1788   | 6                   |
| ZNF501                   | chr3:44747094-44747609    | 515    | 6                   |
| GLS                      | chr2:191451049-191451529  | 480    | 5                   |
| STAC                     | chr3:36394290-36394797    | 507    | 5                   |
| AOF2/KDM1A               | chr1:23291981-23292587    | 606    | 5                   |
| ARL4A                    | chr7:12694039-12694858    | 819    | 5                   |
| MGC52282                 | chr16:2833797-2835269     | 1472   | 5                   |
| PPP3R2                   | chr9:103395353-103396262  | 909    | 5                   |
| TMEM26                   | chr10:62886966-62887538   | 572    | 5                   |
| AKAP5                    | chr14:64005102-64005456   | 354    | 4                   |
| C4orf26                  | chr4:76700625-76701200    | 575    | 4                   |
| PLSCR4                   | chr3:147452685-147453200  | 515    | 4                   |
| APCS                     | chr1:157819813-157820394  | 581    | 4                   |
| ASCL4                    | chr12:106692416-106693003 | 587    | 4                   |
| chrY:009252280-009252324 | chrY:9252232-9253234      | 1002   | 4                   |
| hsa-mir-125b-1           | chr11:121480296-121481146 | 850    | 4                   |
| IMPG1                    | chr6:76842309-76843138    | 829    | 4                   |
| NIPSNAP3A*               | chr9:106552041-106552320  | 279    | 4                   |
| PRDM8                    | chr4:81321867-81322310    | 443    | 4                   |
| REG3A                    | chr2:79242675-79243148    | 473    | 4                   |
| STARD5                   | chr15:79408316-79408650   | 334    | 4                   |
| TAS2R13                  | chr12:10953157-10953586   | 429    | 4                   |
| TSPY1*                   | chrY:9272512-9273574      | 1062   | 4                   |
| VPS53/HCCS1              | chr17:565883-566372       | 489    | 4                   |
| AMT                      | chr3:49431397-49433002    | 1605   | 4                   |
| hsa-mir-190              | chr15:60901038-60901462   | 424    | 4                   |
| PKP2                     | chr12:32941892-32942439   | 547    | 4                   |
| PRY2                     | chrY:23041195-23041991    | 796    | 4                   |
| RASGRP1                  | chr15:36645995-36646651   | 656    | 4                   |
| TRHR                     | chr8:110169206-110169588  | 382    | 4                   |
| TRIM46                   | chr1:153415639-153416250  | 611    | 4                   |
| VGCNL1                   | chr13:100868357-100869465 | 1108   | 4                   |
| CACNA1I                  | chr22:38294917-38295622   | 705    | 4                   |
| EIF2C3                   | chr1:36166658-36167527    | 869    | 4                   |
| POLR2G                   | chr11:62288666-62290507   | 1841   | 4                   |
| TRIM39                   | chr6:30419283-30419802    | 519    | 4                   |
| ZNF132-ZNF324B           | chr19:63648019-63648559   | 540    | 4                   |
| YWHAZ                    | chr8:102035822-102036806  | 984    | 4                   |
| IL18RAP                  | chr2:102405848-102406185  | 337    | 3                   |
| KIAA0913*                | chr10:75218356-75218699   | 343    | 3                   |
| NCAPG                    | chr4:17425456-17425912    | 456    | 3                   |

|                          |                           |      |   |
|--------------------------|---------------------------|------|---|
| RANBP3L                  | chr5:36341631-36342304    | 673  | 3 |
| SLC9A11                  | chr1:171838668-171839333  | 665  | 3 |
| UXT                      | chrX:47400720-47401781    | 1061 | 3 |
| ZRANB1                   | chr10:126661218-126661494 | 276  | 3 |
| ACSBG2                   | chr19:6086156-6086628     | 472  | 3 |
| ANP32A                   | chr15:66902068-66902347   | 279  | 3 |
| BIRC3*                   | chr11:101692463-101692762 | 299  | 3 |
| BIRC3*                   | chr11:101698059-101698296 | 237  | 3 |
| chrY:009952039-009952083 | chrY:9951991-9952929      | 938  | 3 |
| EFEMP1                   | chr2:56003422-56003859    | 437  | 3 |
| ELMO1                    | chr7:36991993-36992378    | 385  | 3 |
| ESR1                     | chr6:152166503-152167216  | 713  | 3 |
| GPR37                    | chr7:124190104-124190605  | 501  | 3 |
| HTR1E                    | chr6:87699164-87699710    | 546  | 3 |
| IRGC                     | chr19:48912162-48913048   | 886  | 3 |
| OPN5                     | chr6:47853582-47854494    | 912  | 3 |
| PRKAR2B                  | chr7:106467220-106467563  | 343  | 3 |
| RDH11*                   | chr14:67230262-67231134   | 872  | 3 |
| TMEM178                  | chr2:39741634-39742226    | 592  | 3 |
| TSPY1*                   | chrY:9972318-9973242      | 924  | 3 |
| C9orf79                  | chr9:89683167-89683933    | 766  | 3 |
| CD97                     | chr19:14353805-14354825   | 1020 | 3 |
| chr7:023492469-023492528 | chr7:23492339-23493232    | 893  | 3 |
| EFS                      | chr14:22902908-22903418   | 510  | 3 |
| FANK1*                   | chr10:127572798-127573666 | 868  | 3 |
| FCER1A                   | chr1:157527056-157527493  | 437  | 3 |
| GBP7                     | chr1:89418383-89418680    | 297  | 3 |
| LRGUK                    | chr7:133463272-133463634  | 362  | 3 |
| RBMY1F*                  | chrY:22741869-22742276    | 407  | 3 |
| SBNO1                    | chr12:122400469-122401161 | 692  | 3 |
| TMEM161A                 | chr19:19112981-19114242   | 1261 | 3 |
| U89                      | chr12:6947494-6947953     | 459  | 3 |
| BAG4                     | chr8:38155499-38157065    | 1566 | 3 |
| C11orf56-CNGA4           | chr11:6212996-6214113     | 1117 | 3 |
| chr2:120940376-120940420 | chr2:120940340-120940566  | 226  | 3 |
| ESAM                     | chr11:124139223-124139956 | 733  | 3 |
| MMP2                     | chr16:54068928-54069816   | 888  | 3 |
| MRTO4                    | chr1:19452039-19453347    | 1308 | 3 |
| OCIAD1                   | chr4:48526732-48527227    | 495  | 3 |
| PCDHGB7                  | chr5:140777718-140779014  | 1296 | 3 |
| TFPT                     | chr19:59312693-59313828   | 1135 | 3 |
| TMEM43                   | chr3:14142660-14143414    | 754  | 3 |
| ADAM18                   | chr8:39561749-39562003    | 254  | 2 |
| C11orf42                 | chr11:6185259-6185793     | 534  | 2 |
| C12orf39                 | chr12:21571087-21571695   | 608  | 2 |
| C15orf23                 | chr15:38462907-38463285   | 378  | 2 |
| C1orf14                  | chr1:181191388-181191726  | 338  | 2 |
| C2orf40                  | chr2:106044539-106045122  | 583  | 2 |

|                          |                           |      |   |
|--------------------------|---------------------------|------|---|
| CASQ2                    | chr1:116112084-116112569  | 485  | 2 |
| CCNJL                    | chr5:159676534-159676807  | 273  | 2 |
| CD79A                    | chr19:47075192-47075669   | 477  | 2 |
| chrX:102716046-102716105 | chrX:102715499-102716170  | 671  | 2 |
| EVX2-HOXD13              | chr2:176662732-176663118  | 386  | 2 |
| GABRA6                   | chr5:161040553-161041031  | 478  | 2 |
| GLULD1/ LGSN             | chr6:64087799-64088136    | 337  | 2 |
| HOXC4                    | chr12:52734582-52735121   | 539  | 2 |
| hsa-mir-409              | chr14:100599816-100600310 | 494  | 2 |
| LOC728137                | chrY:9931732-9932611      | 879  | 2 |
| MAB21L2                  | chr4:151724752-151725025  | 273  | 2 |
| NKD2                     | chr5:1060942-1061233      | 291  | 2 |
| OR4D2*                   | chr17:53601321-53601634   | 313  | 2 |
| PECI                     | chr6:4078672-4078939      | 267  | 2 |
| RDH11*                   | chr14:67231632-67231908   | 276  | 2 |
| SCARB2                   | chr4:77357785-77358911    | 1126 | 2 |
| TSPY1*                   | chrY:9292858-9293765      | 907  | 2 |
| USP54                    | chr10:74981142-74981524   | 382  | 2 |
| YEATS4                   | chr12:68040280-68040602   | 322  | 2 |
| ZNF382                   | chr19:41786098-41786472   | 374  | 2 |
| ZNF776                   | chr19:62950566-62950893   | 327  | 2 |
| ADAM23*                  | chr2:207015394-207015821  | 427  | 2 |
| ADRA1A                   | chr8:26783436-26783669    | 233  | 2 |
| AKAP6                    | chr14:31866691-31867021   | 330  | 2 |
| ALS2CR4                  | chr2:202196160-202196596  | 436  | 2 |
| AQP5                     | chr12:48642812-48643226   | 414  | 2 |
| AR                       | chrX:66679684-66679999    | 315  | 2 |
| ARID1A                   | chr1:26897573-26897743    | 170  | 2 |
| ARL6IP1                  | chr16:18713293-18713623   | 330  | 2 |
| ART3                     | chr4:77214832-77215186    | 354  | 2 |
| BBX                      | chr3:108906854-108907793  | 939  | 2 |
| BMP5                     | chr6:55850702-55850992    | 290  | 2 |
| C10orf62                 | chr10:99334500-99335157   | 657  | 2 |
| C11orf11/DAGLA           | chr11:61205573-61205991   | 418  | 2 |
| C17orf47                 | chr17:53974344-53974674   | 330  | 2 |
| C6orf150-MTO1            | chr6:74224461-74225856    | 1395 | 2 |
| C8A                      | chr1:57092283-57092731    | 448  | 2 |
| CCL28                    | chr5:43450369-43452174    | 1805 | 2 |
| CDC42EP3                 | chr2:37755007-37755389    | 382  | 2 |
| CDKL1                    | chr14:49934096-49935365   | 1269 | 2 |
| CHAF1A                   | chr19:4355126-4355610     | 484  | 2 |
| CHDH                     | chr3:53853729-53853971    | 242  | 2 |
| COL14A1                  | chr8:121329622-121330270  | 648  | 2 |
| DAAM2                    | chr6:39869408-39869705    | 297  | 2 |
| DBX1                     | chr11:20143303-20143839   | 536  | 2 |
| DUSP28                   | chr2:241150443-241151022  | 579  | 2 |
| ESD                      | chr13:46269450-46269807   | 357  | 2 |
| ESPL1                    | chr12:51973103-51973802   | 699  | 2 |



|                 |                           |      |   |
|-----------------|---------------------------|------|---|
| FARS2           | chr6:5313366-5313795      | 429  | 2 |
| FBXL14          | chr12:1575192-1575705     | 513  | 2 |
| FLJ20701        | chr2:229837449-229837775  | 326  | 2 |
| FLJ25371        | chr4:160177552-160177861  | 309  | 2 |
| GABPA           | chr21:26029258-26029502   | 244  | 2 |
| GAD2            | chr10:26543017-26543366   | 349  | 2 |
| GPR176          | chr15:38000945-38001148   | 203  | 2 |
| GTPBP5          | chr20:60201576-60201914   | 338  | 2 |
| HMG20A          | chr15:75535442-75535895   | 453  | 2 |
| HRASLS2         | chr11:63088073-63088674   | 601  | 2 |
| KCNAB3          | chr17:7773722-7774317     | 595  | 2 |
| LOC346653       | chr7:128099269-128099589  | 320  | 2 |
| LOC90826        | chr4:148825008-148825632  | 624  | 2 |
| MBOAT2          | chr2:9065606-9065996      | 390  | 2 |
| MYBBP1A         | chr17:4405472-4406134     | 662  | 2 |
| MYC             | chr8:128814109-128814494  | 385  | 2 |
| MYLK2           | chr20:29872807-29873206   | 399  | 2 |
| NEXN            | chr1:78154871-78155155    | 284  | 2 |
| NTSR2           | chr2:11726133-11726414    | 281  | 2 |
| OR2AG2          | chr11:6747053-6747306     | 253  | 2 |
| OR51I1          | chr11:5418962-5419300     | 338  | 2 |
| OR52B6          | chr11:5559093-5559449     | 356  | 2 |
| PANX3           | chr11:123986312-123986775 | 463  | 2 |
| PKD2L2          | chr5:137251532-137251987  | 455  | 2 |
| PRKACA          | chr19:14084808-14085157   | 349  | 2 |
| RAPH1           | chr2:204106323-204106605  | 282  | 2 |
| RBMY1A1*        | chrY:22476814-22477221    | 407  | 2 |
| RBP4-PDE6C      | chr10:95354468-95354771   | 303  | 2 |
| RFX4            | chr12:105601177-105601756 | 579  | 2 |
| ROBO2           | chr3:77169110-77169447    | 337  | 2 |
| SDC2            | chr8:97577136-97577459    | 323  | 2 |
| SEPHS1          | chr10:13428538-13428814   | 276  | 2 |
| SLC19A3         | chr2:228289412-228290369  | 957  | 2 |
| SMARCC2         | chr12:54868475-54868846   | 371  | 2 |
| SNX17           | chr2:27448509-27449040    | 531  | 2 |
| STEAP4          | chr7:87776471-87776690    | 219  | 2 |
| TMEM59          | chr1:54290117-54290384    | 267  | 2 |
| U32A            | chr19:54683045-54683286   | 241  | 2 |
| USP5            | chr12:6841859-6842133     | 274  | 2 |
| ZFAND3          | chr6:37893671-37894315    | 644  | 2 |
| ZNF416          | chr19:62779897-62780330   | 433  | 2 |
| ADAM23*         | chr2:207017528-207017956  | 428  | 2 |
| AQP1            | chr7:30918500-30919105    | 605  | 2 |
| C1orf181/ZNHIT6 | chr1:85950790-85951952    | 1162 | 2 |
| CCDC51          | chr3:48451485-48451841    | 356  | 2 |
| CDK5RAP2        | chr9:122382626-122383052  | 426  | 2 |
| CGNL1           | chr15:55453175-55453409   | 234  | 2 |
| COMMD3          | chr10:22649018-22649676   | 658  | 2 |

|                           |                           |      |   |
|---------------------------|---------------------------|------|---|
| EPB41L5                   | chr2:120484854-120486295  | 1441 | 2 |
| FAM96A-SNX1               | chr15:62174270-62174648   | 378  | 2 |
| FANK1*                    | chr10:127571411-127571678 | 267  | 2 |
| FGF5*                     | chr4:81407246-81407681    | 435  | 2 |
| GBGT1                     | chr9:135026870-135027167  | 297  | 2 |
| HBII-85-22                | chr15:22886367-22886640   | 273  | 2 |
| hsa-mir-380               | chr14:100560687-100561042 | 355  | 2 |
| INCA1                     | chr17:4833331-4833943     | 612  | 2 |
| LOC149134                 | chr1:245020156-245020893  | 737  | 2 |
| MBD2                      | chr18:50005440-50005746   | 306  | 2 |
| MGAT4B                    | chr5:179164650-179165010  | 360  | 2 |
| MICALCL*                  | chr11:12272294-12272885   | 591  | 2 |
| PGAM2                     | chr7:44072241-44072524    | 283  | 2 |
| SECISBP2                  | chr9:91122377-91123111    | 734  | 2 |
| SLC1A7                    | chr1:53382148-53382654    | 506  | 2 |
| PFKM                      | chr12:46805033-46805171   | 138  | 2 |
| MARCH3                    | chr5:126393185-126393455  | 270  | 1 |
| A4GNT                     | chr3:139332145-139332514  | 369  | 1 |
| AIM1                      | chr6:107064472-107064886  | 414  | 1 |
| AKR1C3                    | chr10:5128288-5128873     | 585  | 1 |
| AOC2                      | chr17:38250627-38250901   | 274  | 1 |
| AP3B2                     | chr15:81180387-81180843   | 456  | 1 |
| AP3M2                     | chr8:42130805-42131441    | 636  | 1 |
| ARFGAP1                   | chr20:61371650-61372427   | 777  | 1 |
| BCL2L1                    | chr20:29771749-29772217   | 468  | 1 |
| C15orf39                  | chr15:73279087-73279719   | 632  | 1 |
| C19orf18                  | chr19:63175473-63176184   | 711  | 1 |
| C1orf192                  | chr1:159602690-159603529  | 839  | 1 |
| C21orf88                  | chr21:39908568-39908834   | 266  | 1 |
| C6orf47                   | chr6:31734241-31734607    | 366  | 1 |
| CASC3                     | chr17:35544911-35545408   | 497  | 1 |
| CCDC27                    | chr1:3659531-3659895      | 364  | 1 |
| CCDC42                    | chr17:8590680-8591244     | 564  | 1 |
| CD160-PDZK1               | chr1:144430757-144431713  | 956  | 1 |
| CEP72                     | chr5:662348-662738        | 390  | 1 |
| chr13:043633831-043633890 | chr13:43633575-43633980   | 405  | 1 |
| chr5:095212395-095212441  | chr5:95212175-95213369    | 1194 | 1 |
| chr8:141014651-141014710  | chr8:141014611-141014942  | 331  | 1 |
| chrY:009232377-009232432  | chrY:9232061-9232808      | 747  | 1 |
| chrY:009235502-009235546  | chrY:9235464-9235764      | 300  | 1 |
| chrY:009955587-009955631  | chrY:9955466-9955849      | 383  | 1 |
| COL12A1                   | chr6:75975822-75976113    | 291  | 1 |
| CSPP1                     | chr8:68157608-68157902    | 294  | 1 |
| CSRP2BP                   | chr20:18071234-18071633   | 399  | 1 |
| DDR2                      | chr1:160870687-160871041  | 354  | 1 |
| DGKZ*                     | chr11:46306922-46308347   | 1425 | 1 |
| DHDDS                     | chr1:26667174-26667550    | 376  | 1 |
| DNAI2                     | chr17:69779023-69780043   | 1020 | 1 |

|                  |                           |     |   |
|------------------|---------------------------|-----|---|
| DPYSL3           | chr5:146815776-146816621  | 845 | 1 |
| DPYSL4           | chr10:133848370-133848880 | 510 | 1 |
| EDAR             | chr2:108913514-108914123  | 609 | 1 |
| FAM76B           | chr11:95159789-95160293   | 504 | 1 |
| FBXO42           | chr1:16549317-16549761    | 444 | 1 |
| FGF5             | chr4:81402621-81403077    | 456 | 1 |
| FGFR2            | chr10:123349173-123349436 | 263 | 1 |
| FLJ16331         | chr11:64738193-64738642   | 449 | 1 |
| FPRL1/ FPR2      | chr19:56964124-56964439   | 315 | 1 |
| FTH1             | chr11:61490234-61490865   | 631 | 1 |
| FTMT             | chr5:121215923-121216209  | 286 | 1 |
| GAB2             | chr11:77728586-77728874   | 288 | 1 |
| GABRD            | chr1:1939628-1940198      | 570 | 1 |
| GANAB            | chr11:62149824-62150129   | 305 | 1 |
| GART-SON         | chr21:33836611-33837040   | 429 | 1 |
| GATA4            | chr8:11600710-11601200    | 490 | 1 |
| GGPS1            | chr1:233559445-233559811  | 366 | 1 |
| GNG10            | chr9:113461728-113462036  | 308 | 1 |
| GPC4             | chrX:132378805-132379038  | 233 | 1 |
| GPR119           | chrX:129346023-129346269  | 246 | 1 |
| GPR39            | chr2:132891003-132891343  | 340 | 1 |
| HBQ1             | chr16:171665-171995       | 330 | 1 |
| HGF              | chr7:81236660-81236788    | 128 | 1 |
| HIST1H4D         | chr6:26303340-26303672    | 332 | 1 |
| HOXB9            | chr17:44059184-44059670   | 486 | 1 |
| HS3ST2           | chr16:22735429-22735797   | 368 | 1 |
| HS3ST3A1         | chr17:13447400-13447765   | 365 | 1 |
| hsa-mir-325      | chrX:76141180-76141453    | 273 | 1 |
| INPPL1           | chr11:71611331-71611750   | 419 | 1 |
| IQCC             | chr1:32444888-32445372    | 484 | 1 |
| KRTAP13-2*       | chr21:30669233-30670145   | 912 | 1 |
| LGI4             | chr19:40316430-40316718   | 288 | 1 |
| LMO4             | chr1:87570606-87570942    | 336 | 1 |
| LOC387601        | chr11:62752592-62753030   | 438 | 1 |
| LOC388419-GPR142 | chr17:69870085-69870578   | 493 | 1 |
| LOC728137        | chrY:9935267-9935567      | 300 | 1 |
| LOXL3            | chr2:74614673-74614956    | 283 | 1 |
| LY86             | chr6:6534292-6534632      | 340 | 1 |
| MAOB             | chrX:43624426-43624696    | 270 | 1 |
| MAP2K3           | chr17:21128847-21129238   | 391 | 1 |
| MFSD3            | chr8:145706115-145706381  | 266 | 1 |
| MGLL             | chr3:129023336-129023633  | 297 | 1 |
| MTHFD2L          | chr4:75237780-75238068    | 288 | 1 |
| MYEOV            | chr11:68817994-68818273   | 279 | 1 |
| MYH8             | chr17:10264552-10264787   | 235 | 1 |
| NIPSNAP3A*       | chr9:106550768-106551089  | 321 | 1 |
| NRGN             | chr11:124116823-124117129 | 306 | 1 |
| NXP2             | chr2:139258962-139259368  | 406 | 1 |

|                |                           |      |   |
|----------------|---------------------------|------|---|
| OR13C3         | chr9:106338798-106339121  | 323  | 1 |
| OR4F15         | chr15:100175500-100175991 | 491  | 1 |
| OR51I2         | chr11:5430474-5430606     | 132  | 1 |
| OR52M1         | chr11:4522271-4522646     | 375  | 1 |
| PAX1           | chr20:21630953-21631309   | 356  | 1 |
| PAX6           | chr11:31787580-31787835   | 255  | 1 |
| PCDH9          | chr13:66699079-66699376   | 297  | 1 |
| PCNT           | chr21:46570110-46570607   | 497  | 1 |
| PDF            | chr16:67926333-67926564   | 231  | 1 |
| PEBP4*         | chr8:22844096-22844446    | 350  | 1 |
| PGRMC2         | chr4:129431281-129431420  | 139  | 1 |
| PIGR*          | chr1:205187253-205187687  | 434  | 1 |
| POLG           | chr15:87680937-87682248   | 1311 | 1 |
| PORCN*         | chrX:48254102-48254757    | 655  | 1 |
| PTGER2         | chr14:51849368-51849662   | 294  | 1 |
| PTPRA          | chr20:2847597-2848499     | 902  | 1 |
| PWP1           | chr12:106603483-106603586 | 103  | 1 |
| RASGRP2        | chr11:64270152-64270475   | 323  | 1 |
| RET            | chr10:42894118-42894513   | 395  | 1 |
| RGS6           | chr14:71499188-71499430   | 242  | 1 |
| SATB2-FLJ32063 | chr2:200040379-200040621  | 242  | 1 |
| SCG2           | chr2:224176868-224177138  | 270  | 1 |
| SHC1           | chr1:153206668-153207324  | 656  | 1 |
| SLC14A2        | chr18:41453330-41453800   | 470  | 1 |
| SLC43A3        | chr11:56953373-56953657   | 284  | 1 |
| SLITRK4        | chrX:142552892-142553129  | 237  | 1 |
| SMAD1          | chr4:146625313-146625460  | 147  | 1 |
| SYNPO          | chr5:150001423-150001845  | 422  | 1 |
| SYT4           | chr18:39112010-39112313   | 303  | 1 |
| TDRD5          | chr1:177829400-177829789  | 389  | 1 |
| THBS3          | chr1:153431693-153432114  | 421  | 1 |
| TIGD2          | chr4:90250535-90250643    | 108  | 1 |
| TKTL2          | chr4:164612568-164612856  | 288  | 1 |
| TMEM20         | chr10:95640527-95640815   | 288  | 1 |
| TNKS2          | chr10:93549616-93549929   | 313  | 1 |
| TNRC6C         | chr17:73557210-73557510   | 300  | 1 |
| TRIM59         | chr3:161655434-161655536  | 102  | 1 |
| TSHB           | chr1:115377901-115378244  | 343  | 1 |
| UNQ1940        | chr7:135084635-135084892  | 257  | 1 |
| USH2A          | chr1:214665447-214665820  | 373  | 1 |
| VPS41          | chr7:38875129-38875373    | 244  | 1 |
| VSIG9/TIGIT    | chr3:115494082-115494426  | 344  | 1 |
| WNT5B          | chr12:1597850-1598100     | 250  | 1 |
| ZBTB39*        | chr12:55688059-55688440   | 381  | 1 |
| ZFP36          | chr19:44586577-44587165   | 588  | 1 |
| ZNF678         | chr1:225910827-225911191  | 364  | 1 |
| ZNF804A        | chr2:185173904-185174150  | 246  | 1 |
| ABCC5          | chr3:185216645-185216981  | 336  | 1 |

|                           |                           |      |   |
|---------------------------|---------------------------|------|---|
| ABCG8                     | chr2:43920316-43920904    | 588  | 1 |
| ACCN4                     | chr2:220086180-220086573  | 393  | 1 |
| ACTL6B                    | chr7:100093208-100093713  | 505  | 1 |
| ADAM2                     | chr8:39814621-39814971    | 350  | 1 |
| AMHR2                     | chr12:52104592-52104810   | 218  | 1 |
| APBB3                     | chr5:139923672-139923937  | 265  | 1 |
| ATP2B4                    | chr1:201864523-201864955  | 432  | 1 |
| BIRC4BP                   | chr17:6596211-6596677     | 466  | 1 |
| BMP3                      | chr4:82172171-82172387    | 216  | 1 |
| BRD8                      | chr5:137541687-137542035  | 348  | 1 |
| C10orf92                  | chr10:134523509-134523891 | 382  | 1 |
| C14orf115                 | chr14:73886543-73887010   | 467  | 1 |
| C1orf109                  | chr1:37928112-37928981    | 869  | 1 |
| C1orf32/ ILDR2            | chr1:165209642-165209913  | 271  | 1 |
| C20orf179/ BANF2          | chr20:17628127-17628477   | 350  | 1 |
| C20orf28/ SPEF1           | chr20:3709617-3709978     | 361  | 1 |
| C21orf29                  | chr21:44942584-44942861   | 277  | 1 |
| C3orf26                   | chr3:101017761-101018711  | 950  | 1 |
| C4orf30/ DCAF16           | chr4:17421202-17421439    | 237  | 1 |
| C9orf116                  | chr9:137530567-137531087  | 520  | 1 |
| CA3                       | chr8:86539201-86539466    | 265  | 1 |
| CACNA2D3                  | chr3:54130333-54130629    | 296  | 1 |
| CAMK2A                    | chr5:149647876-149648187  | 311  | 1 |
| CAV1                      | chr7:115951653-115951961  | 308  | 1 |
| CCDC109B                  | chr4:110701834-110702148  | 314  | 1 |
| CCDC8                     | chr19:51608195-51608576   | 381  | 1 |
| CDKN2D                    | chr19:10539078-10539574   | 496  | 1 |
| ChGn                      | chr8:19589366-19589601    | 235  | 1 |
| chr10:114605087-114605146 | chr10:114605029-114605332 | 303  | 1 |
| chrX:100630012-100630071  | chrX:100629963-100630266  | 303  | 1 |
| chrX:151832483-151832527  | chrX:151832320-151832556  | 236  | 1 |
| chrY:009254152-009254196  | chrY:9253850-9254663      | 813  | 1 |
| chrY:009256756-009256810  | chrY:9256323-9257130      | 807  | 1 |
| CMA1                      | chr14:24046200-24046415   | 215  | 1 |
| CXCL11                    | chr4:77180874-77181202    | 328  | 1 |
| DLX5                      | chr7:96492475-96492881    | 406  | 1 |
| DNAH9                     | chr17:11727162-11727357   | 195  | 1 |
| DPF2                      | chr11:64874034-64874249   | 215  | 1 |
| DSC2                      | chr18:26936148-26936437   | 289  | 1 |
| DUOXA2                    | chr15:43194620-43194934   | 314  | 1 |
| DYNLRB1                   | chr20:32565267-32566443   | 1176 | 1 |
| EFS-IL25                  | chr14:22905006-22905916   | 910  | 1 |
| FAM109B                   | chr22:40803138-40803450   | 312  | 1 |
| FGF16                     | chrX:76592946-76593263    | 317  | 1 |
| FLJ39502                  | chr2:179460150-179460422  | 272  | 1 |
| FUBP3                     | chr9:132446489-132446859  | 370  | 1 |
| G0S2                      | chr1:207916067-207916304  | 237  | 1 |
| GDNF                      | chr5:37869859-37870209    | 350  | 1 |

|                   |                          |      |   |
|-------------------|--------------------------|------|---|
| GIMAP1            | chr7:150044426-150044956 | 530  | 1 |
| GPR111            | chr6:47758197-47758592   | 395  | 1 |
| GRM4              | chr6:34210894-34211549   | 655  | 1 |
| H2AFY2            | chr10:71481143-71481477  | 334  | 1 |
| HAPLN2            | chr1:154852482-154852849 | 367  | 1 |
| HAVCR2            | chr5:156466452-156466837 | 385  | 1 |
| HOP               | chr4:57217451-57217762   | 311  | 1 |
| HOXD3             | chr2:176733762-176734237 | 475  | 1 |
| hsa-mir-296       | chr20:56828158-56828829  | 671  | 1 |
| hsa-mir-331       | chr12:94223655-94224075  | 420  | 1 |
| HTR4              | chr5:148015321-148015737 | 416  | 1 |
| ICAM5             | chr19:10260682-10260929  | 247  | 1 |
| INPP5B            | chr1:38187254-38187538   | 284  | 1 |
| KRTAP13-3         | chr21:30719629-30719979  | 350  | 1 |
| KTI12             | chr1:52270447-52270938   | 491  | 1 |
| L3MBTL4           | chr18:6300090-6300607    | 517  | 1 |
| LCAP              | chrX:152799505-152799865 | 360  | 1 |
| LOC253012-CCDC132 | chr7:92694358-92694687   | 329  | 1 |
| LOC728137         | chrY:9296947-9297647     | 700  | 1 |
| LOC728137         | chrY:9976406-9977106     | 700  | 1 |
| MAPT              | chr17:41328862-41329197  | 335  | 1 |
| MASP2             | chr1:11027718-11028184   | 466  | 1 |
| MC2R              | chr18:13880214-13880542  | 328  | 1 |
| MCF2L2            | chr3:184626671-184627307 | 636  | 1 |
| MEF2D             | chr1:154726254-154726638 | 384  | 1 |
| MGC13379          | chr11:60916846-60917116  | 270  | 1 |
| MGC26733          | chr2:98228033-98228292   | 259  | 1 |
| MLXIPL            | chr7:72678946-72679242   | 296  | 1 |
| MS4A10            | chr11:60307425-60308559  | 1134 | 1 |
| MS4A7             | chr11:59917920-59918227  | 307  | 1 |
| MT1X              | chr16:55274943-55275471  | 528  | 1 |
| MTDH              | chr8:98726883-98727128   | 245  | 1 |
| NHLH2             | chr1:116182852-116183538 | 686  | 1 |
| NPAL2             | chr8:99375873-99376112   | 239  | 1 |
| NPAS4*            | chr11:65940751-65941118  | 367  | 1 |
| NPR2              | chr9:35784412-35784536   | 124  | 1 |
| NRN1              | chr6:5953573-5953744     | 171  | 1 |
| PA2G4             | chr12:54785624-54785910  | 286  | 1 |
| PAQR7             | chr1:26072173-26072453   | 280  | 1 |
| PAX7              | chr1:18827637-18828088   | 451  | 1 |
| PCP4              | chr21:40163182-40163675  | 493  | 1 |
| PITX1             | chr5:134398494-134398772 | 278  | 1 |
| PLXNA1            | chr3:128188769-128189114 | 345  | 1 |
| PPP4R1L           | chr20:56236375-56236640  | 265  | 1 |
| PRDM11            | chr11:45069895-45070361  | 466  | 1 |
| PSMB8             | chr6:32916666-32917236   | 570  | 1 |
| PSME1*            | chr14:23677646-23677754  | 108  | 1 |
| RDH16             | chr12:55636995-55637363  | 368  | 1 |

|               |                           |     |   |
|---------------|---------------------------|-----|---|
| RETNLB        | chr3:109957672-109958287  | 615 | 1 |
| RGAG1         | chrX:109582279-109582588  | 309 | 1 |
| RNF39         | chr6:30149442-30149931    | 489 | 1 |
| RRAGB         | chrX:55758445-55759286    | 841 | 1 |
| SH2D1B        | chr1:160647874-160648477  | 603 | 1 |
| SHC4          | chr15:47044919-47045321   | 402 | 1 |
| SHMT2         | chr12:55911367-55911782   | 415 | 1 |
| SIGIRR        | chr11:408013-408331       | 318 | 1 |
| SLC28A2       | chr15:43332152-43332508   | 356 | 1 |
| SLC35F5       | chr2:114228998-114229345  | 347 | 1 |
| SLC39A11      | chr17:68604374-68604872   | 498 | 1 |
| SLC6A4        | chr17:25571501-25572226   | 725 | 1 |
| SMTNL2        | chr17:4432730-4433168     | 438 | 1 |
| SPATC1        | chr8:145159485-145160247  | 762 | 1 |
| SPG7          | chr16:88151599-88151843   | 244 | 1 |
| SPI1          | chr11:47356654-47357031   | 377 | 1 |
| SRY           | chrY:2715394-2715685      | 291 | 1 |
| TBX1          | chr22:18124821-18125094   | 273 | 1 |
| TCL6          | chr14:95200830-95201492   | 662 | 1 |
| TERF2         | chr16:67975371-67975643   | 272 | 1 |
| TGIF2         | chr20:34631892-34632306   | 414 | 1 |
| TP53          | chr17:7530676-7530939     | 263 | 1 |
| TRPM1         | chr15:29182210-29182458   | 248 | 1 |
| TSPY1*        | chrY:9276601-9277301      | 700 | 1 |
| UAP1L1        | chr9:139098252-139098685  | 433 | 1 |
| UBE1C-ARL6IP5 | chr3:69213264-69213580    | 316 | 1 |
| WBP11         | chr12:14842725-14842984   | 259 | 1 |
| WDR90         | chr16:654754-655581       | 827 | 1 |
| WIP11         | chr17:63965659-63966206   | 547 | 1 |
| YIPF3         | chr6:43588422-43588842    | 420 | 1 |
| YWHAQ         | chr2:9690119-9690479      | 360 | 1 |
| ZIC4-ZIC1     | chr3:148607115-148607757  | 642 | 1 |
| ZNF160        | chr19:58297559-58298001   | 442 | 1 |
| ZNF19         | chr16:70080762-70080917   | 155 | 1 |
| ZPBP2         | chr17:35278251-35278769   | 518 | 1 |
| ABI2          | chr2:203901882-203902188  | 306 | 0 |
| ACOXL         | chr2:111269166-111269776  | 610 | 0 |
| ACSL5         | chr10:114123987-114124563 | 576 | 0 |
| ACSL6         | chr5:131376810-131377084  | 274 | 0 |
| ADAT1         | chr16:74212575-74212940   | 365 | 0 |
| ADRA1D        | chr20:4176208-4176488     | 280 | 0 |
| AHDC1         | chr1:27746341-27746709    | 368 | 0 |
| ALDH1B1       | chr9:38383071-38383626    | 555 | 0 |
| ALDH1L1       | chr3:127382438-127382727  | 289 | 0 |
| ALDH4A1       | chr1:19103867-19104191    | 324 | 0 |
| ANGPT2        | chr8:6412368-6412898      | 530 | 0 |
| ANXA2         | chr15:58470465-58470934   | 469 | 0 |
| AP3D1         | chr19:2101836-2102176     | 340 | 0 |

|                           |                           |      |   |
|---------------------------|---------------------------|------|---|
| APOLD1                    | chr12:12828941-12829359   | 418  | 0 |
| APOM                      | chr6:31733163-31733472    | 309  | 0 |
| ARHGEF17                  | chr11:72697918-72698619   | 701  | 0 |
| ARL6                      | chr3:98965429-98965782    | 353  | 0 |
| ARSB                      | chr5:78317357-78317474    | 117  | 0 |
| BCL2L14                   | chr12:12116347-12116784   | 437  | 0 |
| BMPR1B                    | chr4:95896326-95896609    | 283  | 0 |
| BPIL3                     | chr20:31081882-31082211   | 329  | 0 |
| BSDC1                     | chr1:32631068-32631512    | 444  | 0 |
| BUB3                      | chr10:124900953-124901356 | 403  | 0 |
| C14orf173/ INF2           | chr14:104250965-104251393 | 428  | 0 |
| C15orf2                   | chr15:22473457-22473698   | 241  | 0 |
| C17orf76                  | chr17:16333926-16334106   | 180  | 0 |
| C1orf38                   | chr1:28074624-28075188    | 564  | 0 |
| C1RL                      | chr12:7153243-7153753     | 510  | 0 |
| C20orf179/ BANF2          | chr20:17625384-17625655   | 271  | 0 |
| C20orf186                 | chr20:31131104-31131472   | 368  | 0 |
| C22orf15                  | chr22:22436801-22437151   | 350  | 0 |
| C3orf22                   | chr3:127759125-127759469  | 344  | 0 |
| C6orf204                  | chr6:118993704-118994038  | 334  | 0 |
| C8orf79                   | chr8:12852999-12853282    | 283  | 0 |
| C9orf19/ GLIPR2           | chr9:36128630-36129074    | 444  | 0 |
| CALML4                    | chr15:66284783-66285215   | 432  | 0 |
| CALU                      | chr7:128167281-128167507  | 226  | 0 |
| CAMK1G                    | chr1:207820029-207820466  | 437  | 0 |
| CART1/ ALX1               | chr12:84195688-84196028   | 340  | 0 |
| CCDC102B                  | chr18:64655051-64655356   | 305  | 0 |
| CCDC117                   | chr22:27499439-27499770   | 331  | 0 |
| CCL27                     | chr9:34653756-34654112    | 356  | 0 |
| CD58                      | chr1:116913536-116913974  | 438  | 0 |
| CD5L                      | chr1:156080644-156080979  | 335  | 0 |
| CD63                      | chr12:54407747-54408454   | 707  | 0 |
| CDH22                     | chr20:44314782-44315010   | 228  | 0 |
| CENTB1/ACAP1              | chr17:7191604-7191894     | 290  | 0 |
| CENTD2/ARAP1              | chr11:72106762-72107013   | 251  | 0 |
| chr22:020880519-020880563 | chr22:20880442-20880625   | 183  | 0 |
| chr9:018815165-018815217  | chr9:18814911-18815428    | 517  | 0 |
| chr9:129995116-129995160  | chr9:129994848-129995333  | 485  | 0 |
| CHRNA1                    | chr2:175337408-175337910  | 502  | 0 |
| CHRNE                     | chr17:4746105-4746457     | 352  | 0 |
| chrY:009231390-009231434  | chrY:9231170-9231654      | 484  | 0 |
| chrY:009233479-009233522  | chrY:9233441-9233663      | 222  | 0 |
| chrY:009251441-009251499  | chrY:9251305-9251941      | 636  | 0 |
| chrY:009951247-009951305  | chrY:9951198-9951700      | 502  | 0 |
| chrY:009953555-009953598  | chrY:9953522-9953775      | 253  | 0 |
| CHST9                     | chr18:23019643-23019999   | 356  | 0 |
| CHX10/VSX2                | chr14:73775141-73775732   | 591  | 0 |
| CIDEC-JAGN1               | chr3:9903047-9904717      | 1670 | 0 |



|                |                           |     |   |
|----------------|---------------------------|-----|---|
| CLEC4A         | chr12:8165633-8166063     | 430 | 0 |
| CLEC4F         | chr2:70903953-70904258    | 305 | 0 |
| CLIP3          | chr19:41199873-41200223   | 350 | 0 |
| CLN6           | chr15:66311154-66311402   | 248 | 0 |
| CNKSR2         | chrX:21302820-21303044    | 224 | 0 |
| CNTNAP4        | chr16:74897750-74898257   | 507 | 0 |
| COBRA1         | chr9:139270357-139270685  | 328 | 0 |
| COLEC12        | chr18:491254-491548       | 294 | 0 |
| CRMP1          | chr4:5948590-5949229      | 639 | 0 |
| CRY1           | chr12:106011935-106012245 | 310 | 0 |
| CSPG4          | chr15:73792570-73793130   | 560 | 0 |
| CTPS2-SYAP1    | chrX:16641814-16642080    | 266 | 0 |
| CTTNBP2NL      | chr1:112739874-112740131  | 257 | 0 |
| CYP19A1        | chr15:49416897-49417354   | 457 | 0 |
| CYSLTR2        | chr13:48179129-48179374   | 245 | 0 |
| DCAMKL2/ DCLK2 | chr4:151220247-151220782  | 535 | 0 |
| DCUN1D3        | chr16:20818551-20818811   | 260 | 0 |
| DEDD2-ZNF526   | chr19:47414073-47414382   | 309 | 0 |
| DGKZ*          | chr11:46326319-46326657   | 338 | 0 |
| DHRS7          | chr14:59702105-59702516   | 411 | 0 |
| DIP2C          | chr10:724149-724401       | 252 | 0 |
| DLX1           | chr2:172660286-172660524  | 238 | 0 |
| DMRTB1         | chr1:53699166-53699305    | 139 | 0 |
| DNAJA4         | chr15:76345797-76346057   | 260 | 0 |
| DPYSL2         | chr8:26489735-26490054    | 319 | 0 |
| DQX1           | chr2:74604647-74604922    | 275 | 0 |
| EBP            | chrX:48264331-48264691    | 360 | 0 |
| EIF5           | chr14:102865110-102865722 | 612 | 0 |
| ELF1           | chr13:40455476-40455848   | 372 | 0 |
| ELF4           | chrX:129047587-129048032  | 445 | 0 |
| ELOVL1         | chr1:43606685-43606907    | 222 | 0 |
| EPHB6          | chr7:142272859-142273278  | 419 | 0 |
| EPX            | chr17:53622391-53622646   | 255 | 0 |
| ERAL1          | chr17:24211972-24212365   | 393 | 0 |
| EXOC4          | chr7:132589926-132590188  | 262 | 0 |
| F7             | chr13:112805222-112805899 | 677 | 0 |
| FABP3          | chr1:31617520-31617884    | 364 | 0 |
| FAM107A        | chr3:58540536-58540876    | 340 | 0 |
| FAM107B        | chr10:14855978-14856487   | 509 | 0 |
| FAM129B        | chr9:129369644-129370170  | 526 | 0 |
| FAM53C         | chr5:137710973-137711431  | 458 | 0 |
| FBXO32         | chr8:124621933-124622167  | 234 | 0 |
| FBXW12         | chr3:48387459-48388131    | 672 | 0 |
| FGF16*         | chrX:76591621-76591996    | 375 | 0 |
| FLJ10781       | chr19:51663252-51663526   | 274 | 0 |
| FLJ36748       | chr5:148700797-148701679  | 882 | 0 |
| FLJ46831       | chr10:129427683-129428340 | 657 | 0 |
| FRAS1          | chr4:79197257-79197641    | 384 | 0 |

|                |                           |     |   |
|----------------|---------------------------|-----|---|
| FUT4           | chr11:93916659-93917006   | 347 | 0 |
| GABRB2         | chr5:160908695-160909199  | 504 | 0 |
| GAL            | chr11:68207442-68207730   | 288 | 0 |
| GALNTL4        | chr11:11601554-11601887   | 333 | 0 |
| GATS           | chr7:99657109-99657536    | 427 | 0 |
| GLCCI1         | chr7:7971715-7972005      | 290 | 0 |
| GLT1D1         | chr12:127903280-127903568 | 288 | 0 |
| GMPS           | chr3:157072059-157072364  | 305 | 0 |
| GPC6           | chr13:92677299-92677841   | 542 | 0 |
| GPR177/WLS     | chr1:68472051-68472492    | 441 | 0 |
| GPR21          | chr9:124837523-124837777  | 254 | 0 |
| GRLF1          | chr19:52197686-52198097   | 411 | 0 |
| GRPEL1         | chr4:7120690-7121063      | 373 | 0 |
| GSN            | chr9:123103457-123104156  | 699 | 0 |
| HBI-115        | chr5:76416591-76417182    | 591 | 0 |
| HBP1           | chr7:106608324-106608655  | 331 | 0 |
| HBZ            | chr16:138667-139234       | 567 | 0 |
| HEXIM1         | chr17:40582101-40582400   | 299 | 0 |
| HHEX           | chr10:94440473-94440706   | 233 | 0 |
| HIST1H3H       | chr6:27887453-27887809    | 356 | 0 |
| HNRPUL2        | chr11:62248140-62248456   | 316 | 0 |
| HOXB13         | chr17:44158717-44158980   | 263 | 0 |
| HRK            | chr12:115801319-115801587 | 268 | 0 |
| HS6ST2         | chrX:131923927-131924275  | 348 | 0 |
| hsa-let-7b     | chr22:44887767-44888118   | 351 | 0 |
| hsa-mir-10b    | chr2:176719385-176719620  | 235 | 0 |
| hsa-mir-138-1  | chr3:44127085-44127496    | 411 | 0 |
| hsa-mir-217    | chr2:56068635-56069196    | 561 | 0 |
| hsa-mir-30b    | chr8:135882087-135882570  | 483 | 0 |
| hsa-mir-32     | chr9:110852722-110852971  | 249 | 0 |
| hsa-mir-324    | chr17:7068862-7069177     | 315 | 0 |
| hsa-mir-34a    | chr1:9138662-9138777      | 115 | 0 |
| hsa-mir-376b   | chr14:100576304-100576599 | 295 | 0 |
| hsa-mir-9-2    | chr5:87997906-87998189    | 283 | 0 |
| HSPC171        | chr16:65818841-65819162   | 321 | 0 |
| HTR1D          | chr1:23391237-23391515    | 278 | 0 |
| IGSF9          | chr1:158182271-158182655  | 384 | 0 |
| ISX            | chr22:33791648-33792544   | 896 | 0 |
| ISY1           | chr3:130365124-130365736  | 612 | 0 |
| JMJD3/KDM6B    | chr17:7696500-7696916     | 416 | 0 |
| JPH1           | chr8:75401001-75401431    | 430 | 0 |
| KCNH7          | chr2:163404698-163404998  | 300 | 0 |
| KCNJ12         | chr17:21258898-21259138   | 240 | 0 |
| KCNJ16         | chr17:65581955-65582302   | 347 | 0 |
| KCNS3          | chr2:17920922-17921420    | 498 | 0 |
| KCTD12         | chr13:76356596-76356885   | 289 | 0 |
| KIAA0408       | chr6:127838603-127838889  | 286 | 0 |
| KIAA0774/MTUS2 | chr13:28958071-28958572   | 501 | 0 |

|                |                           |     |   |
|----------------|---------------------------|-----|---|
| KIAA0892       | chr19:19315083-19315424   | 341 | 0 |
| KIAA0913*      | chr10:75221272-75221834   | 562 | 0 |
| KIAA0913*      | chr10:75223780-75224064   | 284 | 0 |
| KPNA1          | chr3:123717182-123717647  | 465 | 0 |
| KRT36          | chr17:36898423-36898880   | 457 | 0 |
| KRTAP13-2*     | chr21:30667926-30668040   | 114 | 0 |
| LACE1          | chr6:108723406-108723635  | 229 | 0 |
| LAMB2          | chr3:49136450-49136596    | 146 | 0 |
| LCE3C          | chr1:150839090-150839397  | 307 | 0 |
| LDB1           | chr10:103869028-103869453 | 425 | 0 |
| LIMD2          | chr17:59129277-59129583   | 306 | 0 |
| LIME1          | chr20:61838930-61839236   | 306 | 0 |
| LIPC           | chr15:56512603-56512746   | 143 | 0 |
| LMCD1          | chr3:8517305-8517571      | 266 | 0 |
| LMNB2          | chr19:2406141-2406444     | 303 | 0 |
| LMO6/ PRICKLE3 | chrX:48929101-48929513    | 412 | 0 |
| LOC146325      | chr16:5481113-548586      | 473 | 0 |
| LOC55908       | chr19:11207779-11208419   | 640 | 0 |
| LOC643905      | chr2:240632497-240632722  | 225 | 0 |
| LOC728137      | chrY:9930777-9931416      | 639 | 0 |
| LOC728137      | chrY:9933238-9933491      | 253 | 0 |
| LRP12          | chr8:105669467-105669829  | 362 | 0 |
| LYZL4          | chr3:42429530-42429640    | 110 | 0 |
| MAT2A          | chr2:85621713-85622321    | 608 | 0 |
| MAZ            | chr16:29728829-29729307   | 478 | 0 |
| MCART6-CXorf39 | chrX:103291210-103291667  | 457 | 0 |
| MCRS1          | chr12:48244609-48244853   | 244 | 0 |
| MEPE           | chr4:88967962-88968232    | 270 | 0 |
| MGC35308       | chr6:166640169-166640514  | 345 | 0 |
| MGC61598       | chr9:139319446-139319823  | 377 | 0 |
| MICALCL*       | chr11:12267137-12267422   | 285 | 0 |
| MICALCL*       | chr11:12268241-12268646   | 405 | 0 |
| MMP16          | chr8:89410219-89410587    | 368 | 0 |
| MTA2           | chr11:62124832-62125227   | 395 | 0 |
| MTCH2          | chr11:47620456-47620766   | 310 | 0 |
| MTMR11         | chr1:148174395-148175125  | 730 | 0 |
| MYADM          | chr19:59061678-59062075   | 397 | 0 |
| NEFL           | chr8:24874720-24875006    | 286 | 0 |
| NEUROD4        | chr12:53706522-53706804   | 282 | 0 |
| NFAM1          | chr22:41161665-41162443   | 778 | 0 |
| NFATC1         | chr18:75253237-75254059   | 822 | 0 |
| NKX2-5         | chr5:172597459-172597753  | 294 | 0 |
| NPAS4*         | chr11:65944416-65944768   | 352 | 0 |
| NPTXR          | chr22:37571280-37571472   | 192 | 0 |
| NUDT1          | chr7:2249824-2250405      | 581 | 0 |
| OIT3           | chr10:74322035-74322249   | 214 | 0 |
| OLFM3          | chr1:102235654-102236022  | 368 | 0 |
| OLIG2          | chr21:33318732-33318990   | 258 | 0 |

|               |                           |      |   |
|---------------|---------------------------|------|---|
| ONECUT1       | chr15:50868641-50869119   | 478  | 0 |
| OR10A7        | chr12:53898824-53899158   | 334  | 0 |
| OR1B1         | chr9:124431503-124432102  | 599  | 0 |
| OR2A5         | chr7:143378299-143378526  | 227  | 0 |
| OR2AT4        | chr11:74478957-74479299   | 342  | 0 |
| OR2F1         | chr7:143286401-143286723  | 322  | 0 |
| OR2T11        | chr1:246856593-246856748  | 155  | 0 |
| OR4D2*        | chr17:53598925-53599180   | 255  | 0 |
| OR5BF1        | chr1:246579009-246579281  | 272  | 0 |
| OR5M3         | chr11:55998619-55999341   | 722  | 0 |
| OR5V1         | chr6:29432128-29432353    | 225  | 0 |
| OR6B1         | chr7:143332394-143332771  | 377  | 0 |
| OR6S1         | chr14:20177926-20178216   | 290  | 0 |
| OR8B8         | chr11:123820676-123821188 | 512  | 0 |
| OSBPL5        | chr11:3141669-3142089     | 420  | 0 |
| PAX9          | chr14:36197496-36197848   | 352  | 0 |
| PCDHB16       | chr5:140542444-140542744  | 300  | 0 |
| PEBP4*        | chr8:22842184-22842894    | 710  | 0 |
| PEPD          | chr19:38708467-38708804   | 337  | 0 |
| PER2          | chr2:238864247-238864550  | 303  | 0 |
| PEX10         | chr1:2337701-2338163      | 462  | 0 |
| PHACTR1       | chr6:12828334-12828634    | 300  | 0 |
| PHACTR3       | chr20:57727134-57727844   | 710  | 0 |
| PHIP          | chr6:79845456-79845712    | 256  | 0 |
| PHLPPL        | chr16:70306048-70307096   | 1048 | 0 |
| PIGR*         | chr1:205185051-205185266  | 215  | 0 |
| PIK3AP1       | chr10:98381095-98381830   | 735  | 0 |
| PIWIL2        | chr8:22188638-22188814    | 176  | 0 |
| PLK3          | chr1:45043537-45043916    | 379  | 0 |
| PON3          | chr7:94868601-94868857    | 256  | 0 |
| PPARG         | chr3:12307394-12307708    | 314  | 0 |
| PPM1J-FAM19A3 | chr1:113064204-113064563  | 359  | 0 |
| PPOX          | chr1:159403112-159403496  | 384  | 0 |
| PPP1CA        | chr11:66922959-66923354   | 395  | 0 |
| PPP2R3B       | chrY:224188-224743        | 555  | 0 |
| PREB          | chr2:27210002-27210319    | 317  | 0 |
| PRPF8         | chr17:1501032-1501353     | 321  | 0 |
| PSME1*        | chr14:23675907-23676180   | 273  | 0 |
| PTAFR         | chr1:28377462-28377853    | 391  | 0 |
| PTF1A         | chr10:23522308-23522656   | 348  | 0 |
| PTGS1         | chr9:124171411-124172108  | 697  | 0 |
| QSCN6L1       | chr9:138241423-138241762  | 339  | 0 |
| RAB11FIP1     | chr8:37880639-37880928    | 289  | 0 |
| RAI1          | chr17:17633670-17633867   | 197  | 0 |
| RAXL1/RAX2    | chr19:3726037-3726276     | 239  | 0 |
| RBM12         | chr20:33704136-33704420   | 284  | 0 |
| RBM15         | chr1:110684724-110685080  | 356  | 0 |
| RBMY1A1*      | chrY:22453273-22453680    | 407  | 0 |

|                  |                           |     |   |
|------------------|---------------------------|-----|---|
| RBM1A1*          | chrY:22473788-22474194    | 406 | 0 |
| RBM1F*           | chrY:22860791-22861010    | 219 | 0 |
| REM2             | chr14:22422461-22422841   | 380 | 0 |
| RETN             | chr19:7640668-7641054     | 386 | 0 |
| RHOBTB2          | chr8:22909270-22909651    | 381 | 0 |
| RIOK3            | chr18:19287383-19287958   | 575 | 0 |
| RLBP1            | chr15:87566066-87566535   | 469 | 0 |
| RPL12            | chr9:129248910-129249476  | 566 | 0 |
| RPS6KL1          | chr14:74457965-74458464   | 499 | 0 |
| RSBN1L           | chr7:77164612-77164868    | 256 | 0 |
| RSPO1            | chr1:37872595-37872931    | 336 | 0 |
| RSPO3            | chr6:127482898-127483157  | 259 | 0 |
| RYR1             | chr19:43616537-43616776   | 239 | 0 |
| S100A5           | chr1:151780520-151780728  | 208 | 0 |
| SALL2            | chr14:21062667-21062916   | 249 | 0 |
| SAMD7            | chr3:171113745-171114016  | 271 | 0 |
| SCAND1-C20orf152 | chr20:34015146-34015395   | 249 | 0 |
| SCN10A           | chr3:38814325-38814753    | 428 | 0 |
| SCN3B            | chr11:123027985-123028400 | 415 | 0 |
| SCN4B            | chr11:117532224-117532476 | 252 | 0 |
| SCUBE3           | chr6:35285339-35285902    | 563 | 0 |
| SDCBP            | chr8:59627644-59627982    | 338 | 0 |
| SEPN1            | chr1:25997796-25998197    | 401 | 0 |
| SERPINE2         | chr2:224615472-224615750  | 278 | 0 |
| SERTAD2          | chr2:64737799-64738050    | 251 | 0 |
| SH2B3            | chr12:110325381-110325945 | 564 | 0 |
| SIX2             | chr2:45088538-45088896    | 358 | 0 |
| SLC17A1          | chr6:25939813-25940281    | 468 | 0 |
| SLC25A13         | chr7:95787757-95788013    | 256 | 0 |
| SLC44A5          | chr1:75851407-75851825    | 418 | 0 |
| SLC5A6           | chr2:27289374-27289679    | 305 | 0 |
| SLC6A18          | chr5:1278921-1279202      | 281 | 0 |
| SLC6A19*         | chr5:1253195-1253678      | 483 | 0 |
| SLC6A19*         | chr5:1256160-1256412      | 252 | 0 |
| SLC8A3           | chr14:69702855-69703149   | 294 | 0 |
| SLITRK1          | chr13:83356452-83356772   | 320 | 0 |
| SNRPB2           | chr20:16656613-16657052   | 439 | 0 |
| SNX16            | chr8:82916335-82916684    | 349 | 0 |
| SNX19            | chr11:130292412-130292895 | 483 | 0 |
| SPOCK2           | chr10:73518191-73518398   | 207 | 0 |
| SPPL2B           | chr19:2283126-2283227     | 101 | 0 |
| SPTBN5           | chr15:39973957-39974308   | 351 | 0 |
| SRF              | chr6:43244221-43244751    | 530 | 0 |
| SSH1             | chr12:107774368-107774680 | 312 | 0 |
| ST3GAL4          | chr11:125783513-125783967 | 454 | 0 |
| ST6GALNAC5       | chr1:77107674-77107968    | 294 | 0 |
| ST8SIA5          | chr18:42589224-42589673   | 449 | 0 |
| STEAP2           | chr7:89680425-89680732    | 307 | 0 |

|                |                           |     |   |
|----------------|---------------------------|-----|---|
| STK11          | chr19:1157428-1157685     | 257 | 0 |
| STK4           | chr20:43028719-43029087   | 368 | 0 |
| STOML3         | chr13:38462640-38462805   | 165 | 0 |
| SULT2B1        | chr19:53770475-53771201   | 726 | 0 |
| SYMPK          | chr19:51010844-51011119   | 275 | 0 |
| SYT3           | chr19:55832483-55832798   | 315 | 0 |
| TAP1           | chr6:32924348-32924833    | 485 | 0 |
| TAS2R16        | chr7:122424495-122425048  | 553 | 0 |
| TBX15          | chr1:119338116-119338242  | 126 | 0 |
| TCF2/HNF1B     | chr17:33180715-33181386   | 671 | 0 |
| TCF21          | chr6:134253096-134253367  | 271 | 0 |
| TENC1          | chr12:51732437-51732627   | 190 | 0 |
| TGFBI          | chr5:135393929-135394119  | 190 | 0 |
| TGM7           | chr15:41381751-41381968   | 217 | 0 |
| THPO-CHRD      | chr3:185578764-185579059  | 295 | 0 |
| TJP2           | chr9:70980968-70981311    | 343 | 0 |
| TLE3           | chr15:68178886-68179024   | 138 | 0 |
| TMEM113/ WDR82 | chr3:52272452-52272661    | 209 | 0 |
| TMEM5          | chr12:62459856-62460120   | 264 | 0 |
| TNFRSF6B       | chr20:61797206-61797513   | 307 | 0 |
| TNFRSF8        | chr1:12047062-12047395    | 333 | 0 |
| TNPO3          | chr7:128482044-128482356  | 312 | 0 |
| TNRC5/ CNPY3   | chr6:43005362-43005588    | 226 | 0 |
| TRIM47         | chr17:71384556-71384827   | 271 | 0 |
| TSPY1*         | chrY:9271585-9272221      | 636 | 0 |
| TSPY1*         | chrY:9291956-9292568      | 612 | 0 |
| TSPY1*         | chrY:9971455-9972028      | 573 | 0 |
| TSPY1*         | chrY:9294392-9294680      | 288 | 0 |
| TSPY1*         | chrY:9973851-9974114      | 263 | 0 |
| TSPY1*         | chrY:9974393-9974746      | 353 | 0 |
| TSPY2*         | chrY:6175503-6176027      | 524 | 0 |
| TSPY2*         | chrY:6171161-6171493      | 332 | 0 |
| UBXD1/UBXN6    | chr19:4407312-4407634     | 322 | 0 |
| USP52/PAN2     | chr12:55013432-55013755   | 323 | 0 |
| VAMP5          | chr2:85671309-85671756    | 447 | 0 |
| VASH2          | chr1:211191708-211191969  | 261 | 0 |
| VAX1           | chr10:118885229-118885493 | 264 | 0 |
| VIP            | chr6:153111031-153111191  | 160 | 0 |
| WIPF1          | chr2:175168636-175168929  | 293 | 0 |
| XAB1/ GPN1     | chr2:27707545-27708146    | 601 | 0 |
| XPO5           | chr6:43651125-43651634    | 509 | 0 |
| ZBED1          | chrY:2429383-2429656      | 273 | 0 |
| ZBTB39*        | chr12:55685946-55686166   | 220 | 0 |
| ZDHHC17        | chr12:75682918-75683188   | 270 | 0 |
| ZGPAT          | chr20:61835313-61835570   | 257 | 0 |
| ZNF174         | chr16:3392045-3392580     | 535 | 0 |
| ZNF197         | chr3:44638870-44639219    | 349 | 0 |
| ZNF454         | chr5:178297077-178297344  | 267 | 0 |

|        |                          |     |   |
|--------|--------------------------|-----|---|
| ZNF533 | chr2:180435791-180436036 | 245 | 0 |
| ZNF7   | chr8:146024089-146024643 | 554 | 0 |
| ZNF721 | chr4:484493-484769       | 276 | 0 |
| ZSCAN1 | chr19:63238217-63238640  | 423 | 0 |

---

---

Supplementary table 2. Fifty seven most significant EBP50 bound genomic regions with potential TCF/LEF motif highlighted in yellow and TEAD1 motif in cyan.

|   |                  |                                                                                                                                                                                                                                                                                                                                                                                                                                                                                                                                                                                                                                                                                                                                                                                                                  |
|---|------------------|------------------------------------------------------------------------------------------------------------------------------------------------------------------------------------------------------------------------------------------------------------------------------------------------------------------------------------------------------------------------------------------------------------------------------------------------------------------------------------------------------------------------------------------------------------------------------------------------------------------------------------------------------------------------------------------------------------------------------------------------------------------------------------------------------------------|
| 1 | <b>MTMR11</b>    | TAGAACAGAGCCTAGAACAAAGGCCTGGCACATAGCAGGCACTAACTATGTATCGAATAAGTAAATTTGAAAAGGGGTAACAGGG<br>TCAAGGAAACAGAA <b>GGAATG</b> TCAAGGTCCAGCTCTCAGCCAGCTCTAGAGGCTGTGAGGGAGGACAGCGAGCCTCAGGCAG<br>ACGTACTTCGAGCCACGAGAGGAACACAGGGGTATCTTTGGTGAGGGCATGAAACAAGATTGGCGTAGGATGAAATTTGGAAG<br>TCTTTGGAGAGTGATAGGGCATTATTACCTGGGAGGCATCTGGAGGCCAGGCAACTGCTAGGCTGACGACTCCTGGGCTCCG<br>GCATCCTATTTCTGGACAGACTTTGGTCCAGAGGGTTGAGGGGGGTCTAGAGTTAACCCCTAGGCTCCCCAACTCCCCAGA<br>GGCAGCTGCCTGTAGAGGCCTACACTCACACTCTCGGGGAAACTGAGATCAGTGTCTGTGGGGAGCTCCAGACCTAACAGG<br>GCTGGTAAACAGTAAAGGGAGGGGCTGGTTAATGGATAATGAGACAACGAACTTGAGACTGAGAAAGACGGACCAGGCTCCAT<br>CAGCAGAAGCTGATAGACAGACACCCCTCCTCCTCCTCTAGAGCCTTTGCTTCCCCCTTTTATCTCCACCTCATCCCCGT<br>TCTCACCTCTTGCCGACACCCCCAAATTCCTTCTCCTACCCCATCTCTGGCTCCTCCTCTGGGG                        |
| 2 | <b>TRIM46</b>    | GTGTGCATTCACTCACTGAACAAATATTTATTGAGCACCTATGTGCATGGTCTATTCTAGGTGTTGGAGATACAGCAGTAAACAA<br>GATGGACAAGGTTAATTATTAACACCAGGCAAAGATTAATTGGCATCATTACTGTTATTACCATATATCCCAATGAGAGAGAT<br>GAAGGGAGGTGCAATGCTGGTAAATGGGCACCGCCCGGAGACTGCAGGAAAGGCT <b>CTTTGAT</b> GCCAGTATGTACCACCAGG<br>TGGCACTGTGGAGCACCACCAGCGGATGTCTCCACTCCCATCTTGCCAGTGGAGGAGGGCACCAAACTGCTGTAGTGGTAGC<br>ATAGCACCTTACCCACAC <b>CATTGT</b> CTGACCATCA <b>CATTGTTCTTTG</b> TGCCCTAGGGCCTTATGTGCCAGACCACAAGGAAG<br>AGGTGACCCACTACTGCAAGACATGCCAACGCCTGGTATGTCAACTCTGCCGGGTGCGGCGCACCCACAGCGGGCACAAGAT<br>CACACCAGTGCTCAGTGCCTACCAGGCCCTCAAGGTAAGGACCCCCCTTATCCAACCCTAGTGCTAACTCACACTCTTACCCT<br>CTTGACCTCCTCCCAACTGCTGGCT                                                                                                                                |
| 3 | <b>LOC149134</b> | TGAAAGGCTGTGGCCACCAGGGAGGGGAGAGGGGCTGCTGGGAAGCTGGCAGGGGCCCCAGGGTTGGCAGATTGGGGAGG<br>AAGAGGCAGCGATGTTTGCAAGATGCTGTTCAACCCCTCTCAGTGACAGGCTCTTAGAAAAATCTAAAATGGCACAAAATGTTA<br>GAGCTGGAAGGGACCTTGGAGAACACCTAGTTCAGCCCTCCTGTTTTCCAGGTGAGGTGAGAGGAGTGAAGTGACTTGCCC<br>AAGACCACACAGTGAGTCAGGAGCAGGCCTGTCCCTCCAGCAGTGGTGCCATGTTGTCCCAAGCCATGGTGGCAGAGGAG<br>CTGGTGTGAACGCCCATCCTGCCACGTCTGTGATGTGGGCACCTCACATGACTGTCCCCTCCAGCTCTTGGGGGGACCT<br>AGGACATTCTGTGAGCCTGCAGGAAAGTTTACCAAATGCTGCAG <b>CTTTGT</b> CCTGGTGGTGTGAGGGCACCCCGTTAACGGCAAC<br>CTTGCAATTTGCTATGTGGAGTGACCGTCACTTTACCGTCGGCATTGTGAAGGAAGCGTGTTTATCTGAAATCTAAGAAGATGA<br>GAG <b>TCAAAG</b> ACACCCAGCAAACGGCGGTTTCCGTGAGCAGGTAGGCTGACCTTTCTCATGTGCACAGGAGGGAAGGTCTACA<br>GCTGCGGAGGATGGCAGGTGGCATCTCGGGGCCCTCCTGTGTGCTGTGGCCATGATGCATGGGGACAGCAGCGGGCGCAG |
| 4 | <b>XAB1</b>      | AAAGGATGGAAGCTGATTGTGGGAGAGGTAGGTGATCAGAAATACTATTTACGCTTGAGATTTAGTTTTCTTACCATCTCCCCA<br>GATGGCAGGCTGTTGTAATTAAGAGCAGAGAGTATGATAGGATAACTGACAGCTACCTGGGTCCACAAGGTAGTATTTTGCC<br>TTGGAGGATCATCTGTTGGTCAACCCTCTTTAGACTGGGAAACTCAGAAATGAGTGAGTTAGTTGGATTAACCTCTTAGTAAAT<br>TGCTGTATGAAATGTGACTCTCTCCGTAGGCAAGTCTAAGTAGGAAGACTAATCATAATCAGCAGATTGCTTGGTTTATTATGA<br>GGATCAGAGCCGGAGGTGTTATACAGGTGGCCTAATGACCAATGCCAGTGGGCTGTCACTGCCTGATGCACCTGTATTACATT<br>TTGGTCACTTTGCTTTCTTCAATTTGCCTGACCACTCCTTAAATCAAATGAGTGAGCCAGACCTTGATAATGACTGTTTCCCTGT<br>GTGGTTAAGTTTGTATGGTAGTCAAGGATTAGGTTGCCAGTATCCATTAATGGAACACTAATTTATAATGCCGTTTGTGTGAATG<br>ATAGCCT                                                                                                                                                                   |
| 5 | <b>EFEMP1</b>    | ATCCATTT <b>CAAAG</b> GGGACGGTGCATTTCTGCCCCAGTCCCACACCCCGGGGATGGAGGTGGGGCTGCAAAACTCTGTT<br>CTCTAGAACGTTAAGGCTTTCCAGTATACTACCTTGAGCTAGCAGAGTTCCTTGACACAGCACAGCAAAAATACCTGTGAGCC<br>AATATGAATTGCCTTGGCCTCAAGCTTTTTATTTTTAAACAAAATAACAAAACAAAACCTCGGAGAGCAATCTTCCAGTTCTAGTA<br>GAATACTAGACCTTCTCACATGTCTCAGAGCTTCTCACATCCCCAGCACAAACT <b>TCAAAG</b> TGGCATTCCACGCCCTTCTCT<br>GCGCACAG <b>CTTTGTT</b> TAAAGTCCCAGGTTGTGTGGAGGGGAGCCCAAAGCGACTGATTCTCTTTTGTCTTATCAGTCTGGG<br>TCCCCGACACGCTACCTTC                                                                                                                                                                                                                                                                                                                      |



|    |                  |                                                                                                                                                                                                                                                                                                                                                                                                                                                                                                                                                                                                                                                                                     |
|----|------------------|-------------------------------------------------------------------------------------------------------------------------------------------------------------------------------------------------------------------------------------------------------------------------------------------------------------------------------------------------------------------------------------------------------------------------------------------------------------------------------------------------------------------------------------------------------------------------------------------------------------------------------------------------------------------------------------|
| 6  | <b>ZNF501</b>    | GTATTAGACAGGAAACCAGGTTCTCTGCCTTTGAATACAGTGTCTTTGCATTAGGAGGGTCTTGAAACCTTTCCCTTATGAA<br>GAGTCCTTAACATCTTACAGCAGATACTCCTTACACAAAGGCAATCCTCTTGTTATTTTCGAGAAATCCCCCAATTCTAATTG<br>TAGGAGGATAACTGACAGGAAGTTTCCCTGCTGTTGATTAGCCCGTTCTTAACAAGACCCATTACCTCACGGCTAGCTCA<br>TTTAGTACTTTTCAAATAAATGAATAAACAGATTCAATCAAAGATGGACTGGAAGGGCTTGATTTGAGGTTTTTGTCTTTTCC<br>CATCTGTATATAGAATCAAAGCTTTGTAGAATGTTGATATTACAAGAAGCTTTAAATATTATCTAGCTTTTCAATTTCAATTAACAA<br>ATAAGAAATGGATGAGACTGAGTGACCTGTGTTAGGTCATTGAACAAATTGGTGGCAGAGCTGAGACTAGAATCCACACCTC<br>TTGACTGAGTCCAT                                                                                                                             |
| 7  | <b>CCDC51</b>    | GTACGTGGGGCACACCCACGATGTGCTGCATGGCAAACCCAGGGCTGCGCCCCATCATCCTGAGATCTGTGAGGGGGAC<br>GCCAGACAGGTCAGCTCACAGCTGAGAAAGGCTGGACATAAGTCAGTTTTGAGGCCTAGGGACAGTTCTGAACAGACTAA<br>TCCCCACTCAAATCATCTAAACTGAGCACCACCCTGTTGGGCCAGAGACTGTGGCCCCTGTGGCAAGAGGATGGTCAGG<br>CTCTCCTCTGGGTGCTCTTGGACAATGGAACACAGTTGGGGACGAGCCTCTAGGATGCCATACCTTCCAGTGCCCCGCCAC<br>CATGCCACACAAAGCGGACCCTTCCCTGCTACCCACTT                                                                                                                                                                                                                                                                                               |
| 8  | <b>RETNLB</b>    | GGGAGTTTCAGTTTTCTCGATTTGTGATAAATTCACCTCTCTGTTGGCCCCTACCCATCAAACAGAGGAATAGATTGGAA<br>GAGAAATGAAGTATGTGATCATTATGGGACAATGGAGGAGAGGAAGGGCTGAGAAACAGGGGCATGAAGTGAAGGGGTGA<br>AAGGAAGAGGCAGAAGCCCAAGATCCCCAGTAGCATCCTCAGGGAAACAAGAATGGGCAAGGGGTCTCTGGGAACCA<br>AGAGTCATGACTCAGCCCCAGGGTGCCAGGGTGATACAGACCTGACATGGGGGAAGACGTAGGTGCAGGGAGATGGACA<br>GGGGAGGATACAGGGCATCGTAGTCGCCATTCCCTCTCAGGGAGTTACTCACCAGCAGGGCAGGAGGACGGTCTGCCTT<br>GGCTTTTGACACTAGCACACGAGAGCTTCTTGCTTATAGGAGAGGGACTGTACTCTGAGTAGGAAAGAAGAAAGGGTACAT<br>CCCATGAGCTATCCTCCCCATAATCCCCTTATCCCCTTCAAATTGTCTTCTACCTTGAGGTGACACTGTGTCCAGAATCAG<br>CCTACTCATCAGCTTTAAGGTTAGTTTCCCTCATTTTTAAAGCAGAAGTAAT                       |
| 9  | <b>ZIC4-ZIC1</b> | CCACTTGATAACTTCTACAACCCACAACCTTTTTTTTTTCTCACATTCACTTACCCTGTATATTTGGATGTGTTTCTAAAAAT<br>ACCCTCTTGTCAACGTCCCCGTTGGATTTTCCACGGACTGGAGAGGAGAAGACTGACTTTTTTTTTTTGAAGAATTATTTTC<br>CCTCTCCCCCTCCAACAGCTACCCTTCCCCCTTAGGTCCCCTCCCTTGTGTGTGTGTGTGTGTGCGCCCGGTGTGT<br>TTCCTGAAAGGCGGGCGAGGTGGGTTCAATATCTGTTCTCCCTAGTGAGAGGAATACAGCCTTAGAGAAAACCTTCTCCATA<br>CAGATGAGGTTTTCTAAACTCCAGGGGAAGCAGGATCCAACCTTCCCCTGTAGGTAAAAAGACTTAGTGCCCTCCGATATATC<br>TTTTTTTTTTCCAACCAAGTGTAATAATTTTTAAAGATACCTCGGCCCTTTTACCTCCACTCCTCATTCCATTCCACTCA<br>AAGTTGGTGGGAAATGCTGGGCTGCTAGACTCAGACTTGTGATGGGAACAGAACAATTAATTTTTTTCCGAATTTATATTT<br>CCCCGGCACAAGCACAAATGCTCAGCCAGGTCCCTCAGGCACCGGGAAATCATCCCGGATACCC |
| 10 | <b>OClAD1</b>    | TGGGGTGTATTTAGGGAAGGCATCAAAAGGTGGTGTATGTAAGCAGAATTTGAAATATCGTTAGAAATGACAAAGCAG<br>GGAGTAGAGTTGACTGGGGAACAGTGCACAGAGAACACTGAGGGCAAAGACCTCCAGGCTGTTTCTTGTAGTGAACC<br>CTGAAATAGAAGAAAGTACGCTCAAAGGCACAGGCACCACCAGGCCATGATGGGCCTTATATTGGTGCATGACTGGAG<br>CTATCAAAGACTCCAAGGAAGGAAACACAGCGTTGGATTGTTTACGTTGACTGTCTCCCTTAAGTATGTCTTCCGGGAGAA<br>TAAATGTTAAATGATAAAGTGGCAAAGGGCTCAGAAAGAGATGAGAAACCTGAGAGGCTTTGAGGGGTTGACAAATAGTA<br>GGACTGGATTTGCCACTGTTTAGTCACTAATAACTGCAGTACATGGCACTAATAAATACTTCAAGGAAGGAATGTATGAAAAT<br>GAGTAA                                                                                                                                                         |
| 11 | <b>SCARB2</b>    | ATGCAGATGTCTGTGCCGTGCGTCTTGTCCAGCCTGCAGAACCATGAGCCAAATAAACCTCTTTTCACTACCCAATCTCAGG<br>TATTGTTATAGCAACACAAACAGACAAGGGCGGAAAATGAGGAGACTGATGCTGTGGCAAGGAGATACGGTGTCTCTCTAT<br>ACCTAAAATCAGAAGACTTTATCTGAGAAGAACAAGTACACTTAATGAATGATTGCTGGTGCCTGTTGAAATTATGCAATCATT<br>CGGGACTTAGAAAAAGAGCTTTCTTACAGACTCTAAGGGCTATCGAGGGGAAGCAAGAGGGCTCTTTGGGCTCTACCTTA<br>AATTTAGAATGTTGATACTATACTCAAATGAGTTAATGATGTAGTCATTGTATACTTTTATGTTCAAAGGTGTTAATGTGTTAAATA<br>TAAACATTTAAAATACACCACAGGCCGGGCCAGGTGGCTCATGCCTGTAATCCCAGCATTTTGGGAAGCCAAGGCAGGAGA<br>ATCACTTGATCCCAGGAGTTTGAATGGAATGGCCCTAGGCCTTGCCTACTTTGGGACAGGTGAGGCTCCAAGATACTTCTA                                                            |

|    |                |                                                                                                                                                                                                                                                                                                                                                                                                                                                                                                                                                                                                                                                                                                                                                                                                                                                                                                                                                                                                                                                                                                                                                                                                                                                                                                                                                                                       |
|----|----------------|---------------------------------------------------------------------------------------------------------------------------------------------------------------------------------------------------------------------------------------------------------------------------------------------------------------------------------------------------------------------------------------------------------------------------------------------------------------------------------------------------------------------------------------------------------------------------------------------------------------------------------------------------------------------------------------------------------------------------------------------------------------------------------------------------------------------------------------------------------------------------------------------------------------------------------------------------------------------------------------------------------------------------------------------------------------------------------------------------------------------------------------------------------------------------------------------------------------------------------------------------------------------------------------------------------------------------------------------------------------------------------------|
|    |                | AAAGTCTTGGCTTTCTTCTTATTGAAGGTGATCTATAAAATGTACCATCACACCCTAGTGATTGACATATGTTATTCTAAATG<br>TTTGTGGGGCATCCTAAATCCTGAGCAATACAGCCTCCATAAGAAAAAATTACTCTCTCCTCCCTCCCTCCCTACCCATCATT<br>CCAAAGTTCTTACATTACAGAAGCTGCTTTATGCAGATAGGCTTACATATCCCAGAGGAGAGCTCATATACCATTATATTATATC<br>ACATGCACCTGTGCCAGGCCACAGGGACTCTCTGTGAAGTTACCCATGTCCCTGTCTACCGCCTCCTCCGATCAAGAAGAC<br>CTCATGGCTTCTCATTATCATCTTTGCACCCCCAACTAGGGGAATCTTTCCAGTTTGTGGTTGGTTGGTTGGTTTATT<br>TGTTTGGGGTTATGGGAAAATGAGAATCCCTCTTCAAATCTTATTTCTTTTGTCCCTAATAATGCAGACTTATTGAA<br>ACACGGAAGTAGGAGGAGATATCCTATTACCTTTTTCTTCC                                                                                                                                                                                                                                                                                                                                                                                                                                                                                                                                                                                                                                                                                                                                                                                                              |
| 12 | <b>PCDHGB7</b> | GATTCCGGAGGAGCTGGCCAAGGGCTCGGTGGTGGGGAACCTCGCTAAGGATCTAGGGCTTAGTGCCTGGATGTGTCG<br>GCTCGCGAGCTGCGAGTGAGCGCGGAGAAGCTGCACTTCAGCGTAGACGCGCAGAGCGGGGACTTACTTGTGAAGGAC<br>CGAATAGACCGTGAGCAAATATGCAAAGAGAGAAGAAGATGTGAGTTGCAATTGGAAGCTGTGGTGGAAAATCCTTTAAATA<br>TTTTTCATGTCAATTGGTGATTGAGGATGTTAATGACCACGCCCTCAATCCGAAAGATGAAATAAACTTAGAAATCAGT<br>GAATCCGTGAGCCTGGGGATGGGAACAATCTTGAGTCTGCAGAAGATCCTGATATTAGTATGAATTCGTGAGCAAATACC<br>AACTAAGTCTAACGAGTATTTCTCATTGGTGGAGAAAGACAATCCTGATGGTGGCAAATATCCAGAATTAGTATTGCAGAAG<br>ACTCTGGACCGAGAAACGCAGAGCGCTCACCCTGGTACTGACCGCCTTAGATGGTGGGGACCCTCCCCGAAGCGGTA<br>CTGCTCAGATAAGAATCCTGGTAATAGATGCCAATGACAACCCCCAGTGTTAGCCAGGACGTGTACAGGGTTAGCCTTC<br>GGGAAGACGTGCCTCCAGGCACCTCCATCCTGAGAGTGAAGGCCACTGACCAGGACGAGGGCATCAACTCAGAGATCAC<br>TTATTCCTTCTTTGGTGTGGCTGACAAAGCTCAGCACGTGTTCTCTCTGGATTACACTACAGGAAACATTCTAACTCAGCAG<br>CCTTTGGATTTGAAGAAGTAGAAAGATATACGATAAACATAGAAGCAAAAGACCGGAGTCTCTCTCAACACGGTGAAAGT<br>AATTGTAGAAGTTGTAGACGAAAACGACAACAGCCAGAAATAATCATCACGTCACTCTCTGATCAGATTATGGAGGATCCC<br>CTCCAGGAGTGGTTGTTGCCCTCTCAAACACGGGACCAAGACTCAGGGGAAAATGGGGAAGTCAAGTGTAGCTTAAAGT<br>AGAGGTGTTCCATTTAAGATTCATTCTTCTTAATAATTAACAAGCTAGTAACAGATGAGGCCCTGGATCGGGAGCAGAC<br>CCCAGAGTACAACGTACCATCGCAGCCACAGACAGGGGCAAGCCTCCGTATCCTCCAGCAAAACCATAACCCTGCACAT<br>TACTGACGTCAATGACAACGCGCCGGTTTTCGGACAGTCAGCCTACCTGGTCCACGTGCCAGAAAACAACCAGCCGGGT |
| 13 | <b>HTR4</b>    | GCCAAGTTTTGTCTCAACATCTCTCAGCCATTTCCACCTGTTAGTCTTTCTTGGTGTGTATGTCTTGAATATGATTATCT<br>CATATCCCCTATGAAAAATTTAAAGGAGAGGAGCTGTAGATTGTTCTTTAATGACAATAAGATCTAAACTGAATTTGCCACT<br>ACTCCCCTCCCTAAACCAACACCTCACTTAAATAAAGCCATTATCCTCACTCATGGATGCTCAGAGCCTGAATCATCTTTG<br>ACACCTCCACCTCTGTTCCCCTTCTCCCCACTTTCTACTCAAACATTTGCCAGTTCCTGGGGACTCTATTTCCACTCTGTCAT<br>TTGCATCTGTCCCTTCTTATTTCCTACTGGGCCTAATTTATATATATGATGTATGTATGTATATATATATATATAT                                                                                                                                                                                                                                                                                                                                                                                                                                                                                                                                                                                                                                                                                                                                                                                                                                                                                                                                                    |
| 14 | <b>TAP1</b>    | ATTTAGGATGGCAGAATTGCAGTTGGGGCCAGTGAATAACAGGGAGTGGTAGGTTGTACCTGTAGCACTAAGACATCTGGG<br>CGGTTTGGGTAGGCAAAGGAGACATCTTGAAGTGGACAAGGCCCTCCAAGTGAAGGGAGTCAACAGACCCTGGGTG<br>GGCAGCGAGGGGTGCGGTCCAGGACTCAAATATTTCTCTGAGGAGCCACAGCCTTCTGTACTCTGGGGTAGATGGAG<br>AGCAGTACCTAGAGGGAGGTAAGAATAGTGAAGTGAAGTGTAGTCTGCTTCCAGCATTATGTGAAGCAAGAAGGGTAAAGA<br>ATGGAAGGACATCACACAGATGGTGTGGGCCAGAGGAAGGAATCACACTGGGGAGTGAAGGTGGAGGGACCTCACCTC<br>CACAGCCTGGGTGAAGTGCATCTGGTAGAGAACAATGTGACAAGGTTCCCACTGCTTACAGCCCCACTGGTCACCAGCT<br>GCCAC                                                                                                                                                                                                                                                                                                                                                                                                                                                                                                                                                                                                                                                                                                                                                                                                                                                                 |
| 15 | <b>OPN5</b>    | AATAAGCTGTTATGAGAACAGTCTTAGGAAGATTTATTCATGGTCCAAAAGACCAATTAGCAGATGTGAGAGCAGTGGAG<br>TATATTTTATGGCTTAAAGGATTATGCTAACATGAATAATCACATACAACCTACTCCAAGAAGTTTCATTTATATCTTTCACAGAAT<br>CATAAATTCAGCAGAAATTTGACAAGTCATTAGTTTCTCCTCCACTTTTAAACAGGATACTTCTCCTCAACCCCCATATGTT<br>GTTTCCCAAGCAATAGTGCCATGAAATATTGTGCAAGAAAGGCAAGCTTCCATGGTTACAAAATTCGACAAAATGATCCTCTT<br>GGAAATAATATCATAGACCCTGGAAGTTGTACCCAGACTACAGTACCTAAAGAATAGCTACAATACAAAATACAACAATAACAA<br>TATACAAAAATAAAAAATAAGTACATAAGAGATTTCAGATATGCAGCTGATTGGGAACCATTGGTTTGTATCATAGGATGCCATC<br>CCAGGGAAGTGGGGGATGTGGTGTGAGGGCCCTGACCACCTGGGAAGGTAGATAGGACAGCATCTATCTACTATGGGCG                                                                                                                                                                                                                                                                                                                                                                                                                                                                                                                                                                                                                                                                                                                                                          |

|    |          |                                                                                                                                                                                                                                                                                                                                                                                                                                                                                                                                                                                                                                                                                                                                                                                                                                                                             |
|----|----------|-----------------------------------------------------------------------------------------------------------------------------------------------------------------------------------------------------------------------------------------------------------------------------------------------------------------------------------------------------------------------------------------------------------------------------------------------------------------------------------------------------------------------------------------------------------------------------------------------------------------------------------------------------------------------------------------------------------------------------------------------------------------------------------------------------------------------------------------------------------------------------|
|    |          | GTAGGCAATCTTCAAATACAGGAGGTAAAAGAGGGAAGGAATCGACAAATGACTATTTTATTACACAATGAGGTAATTCAGG<br>CACATTCAACTAGAAAAAGAACTCTCTAAAACATATCTCTGAACAAATTCAGTCATGACTATGTGTTGCATTTATTATTTTAA<br>GTAGTACAGTTAGTGTCTGCAAAAATATTTATGATGGTTGCATTGCTATAGCCTGTTTTAGCAAAAAGTATAATTCTGTATCA<br>ATGATGAAATAGCACCTCAACAAAATAATGATAATGATCCCATACTATGCACTGGTACCTCTAATTTCTTTATGA                                                                                                                                                                                                                                                                                                                                                                                                                                                                                                                             |
| 16 | ESR1     | GAGGCCGTTAGGACAGGTAAGGTAATGGGTC TCAAAGGGAGTGGCCGAAATGCAATGGAAAAAGAGAGATTGTAAAGCTA<br>GAAGGCTTAGGAATTGCCTCTTGATTAGGTGTGGAAGGCAAGGGAAAATCAGCCCTCGAAGAAGACAGTGAGATTTAATC<br>TGGGTGGCTGGAGAGACAGTGATGCTGGGCACAGACACGGGGAAGTTGAGAGGAACACCATGTTTGAGAATGGTGACTC<br>ATATTTGAACAAGCCTGCAATGCCAGCAGACCGCTGAAAAAGTGGGGCTGGAGACACATTCAACGGAGGAGCCAGATCA<br>ATCTTTACCCTTCTTCACCTGAGAGAGCCAGTAAGTCACGGCTGGAACGTGTGTGTCCAGCAGGAGAGGGTAGGGAGGGA<br>AGCCAAGAGAGCTGGGAGCCCAGTGAAGTTTTTGC AAAAGGCAGAAGAGGAAAAGTCGGCGTAGCACAGTATACTTTCCC<br>ACCCATGCTCACCAAGCCCAGGGACAAGGCTCACCAAGATGAGTTTGAAGAGAATGCTGGAGAGAAAAGTGGTTAAGAAA<br>ACTGCCTTACTGAACTTCTTGGGCTA CTTTGATTGTAAGTCTCTGAACAATCAAAGCCTGTGAGGAGACAGCTAACCTTC<br>TTATTCTTCTATGTCAATAGTGAACAATTGCAGATCCCCTTTCTTTCTTCTCCTTTCCCCTGTTCCCTCT                                                                                                     |
| 17 | PRKAR2B  | GTACGTAAAAGTGGGCTGATGATCACAGTCAGCCTTGGGCAAGAACAGGCCCTGTATCCTCTCAATTGCCTCCTTTTTTTT<br>CCTTGAGTGGGTATATATTTCTTGCCTCCAGAGACTTGATCAGGAAACACCTTAACCTATTGACAGGAAATGCTGCATGATTG<br>ATTGGTCATAGTTATTATTCTGTACTGCTTGCCCAAGC CATTGACTTTGTTTTTTGGCAGTTACATATAAGCAAGTTGATGGG<br>TCTGTTAATTTCTGGTGTGAAAACAAATTTGATAGCACTCTTTTCATTTCAATGCTGAGCTCTCAGAGTTCATTTGCCATTG<br>CTCCAGTCTG                                                                                                                                                                                                                                                                                                                                                                                                                                                                                                        |
| 18 | ADAM2    | TGGGAAAGCCCTTATTCTACGTGGATTTTGGGTGGGGAAGGCGGCAATGTCGGGGATGAGCTTGAATTGCTGAGTTGGA<br>AACCCTCAGGAAAGCATCCTCCAGGGATG TCAATG TAACTTGGAGGCAAAGGAGAGTAGCGCTGAGGGTCCCAAAAAG<br>GCCAGAGGAGGGGTTTTTCTGCTTACTACTGTCCATCCGCAGCCCGCCGAGCCCGCTGAGCAGAAAACAAGACGCGCCAC<br>ATGGCTTGAAGTCTGGGTCCCAGCCGGAATAATGGCAGTTGGTGGTTACAGGGCAGTTGGAAGCGCAGATGACGCCCC<br>GGCCACGCAGCCTGGAAGAGGTAGGCGGCTGG                                                                                                                                                                                                                                                                                                                                                                                                                                                                                               |
| 19 | SECISBP2 | CTGTTTTGCTGACATTTCTGTTCTTAAATCCACTTGCACCTTCTCCTCAAGC CTTTGAGTGAGAGGAAAGTTCTCCTCCAT<br>CTATTGAAATCCACTCTGCATTCTTCCCTGTACTTTTGGTCAACCTCCTATCCCTGCCGCACCTTATACATTTCTCTCAATATT<br>AACGAATTTGCTCTGTGTAGAATTTTTTTTTCTCGTAAAATATACTATTCCATCTCTTGACCATATCTTAGCACTTTTTTTAA<br>TTTTTGAAGAAACCGAGCGATTTTTAAATTATTTCTGTGGCTACTTCCAACTTAAGTTTCTGGAAATTTAGGATACCATC<br>AAGAGTCTGTAGGCTTTCCAGTTTGTAGGACCTACAGGGTATGCAATTCCTGTAAGTCACCAATCTTGGGGAAATTTAG<br>GGAAATGCAGTGGCGGGGTGAGAGTAATCTCGGCCTCCTCAGTTTCTTATTAGTAAATCTTTCTTTCAGGTGACTGCTC<br>AAAGGTCACCTCAGCGAGAGGCCTTTCCAGACTACCCCATCCCGTCTAACGCTAGACTCGTGAGGCCAGGGGAGAAAA<br>GTAAATCACGGCCTAACTCTTGTATAGTCGCTACTGCCTTGGTGGAGACTATCTCCGATATCCAGCACTAAAAGGCAGAT<br>CCAAGACTCCCGCAAGCTACGGTGGGTCCCAGCCAGAGGACTCCTGGGGGTCCCCATTTCCGCAAGC                                                                                                    |
| 20 | PPP3R2   | ACAGGCTCCGGCTACCCAATGGTGGAGATCTGTTAGTGTGTGAGGACTTCTGCACTGAATGTTCCACTAGGGAAAAGGCT<br>TCCTGGAATGAGAGAGCTCTCAGTTTCTTCTTAGGCCTCAGATCTGATTTCAAATCAGCATAGCTGGTGTAGCTAGCATC<br>CACCTCTGCTGTGGAGACACAATTGTCAGTCTCTGCATCTGTGAGCAACAGACATAATGCCACTTTGGCATCCTAGGGAGAT<br>TCCACTGCAGCCTGACTCTACTGCCTCTCCTCCGTAGGACAACCTAAATGCTCATTGTCTCCACTGGGGGTAGGGA<br>CCAGTGTGAGGAGTGTGAGCACTTTCTGGGAGAACACTTTGCTTGCCCTATTTAGCTGGAGGTCCCCTT CATTGAAATTAAT<br>GCTGGTGTGGGCTGCCAACCTGGAAACCCACTGCTAATGAGGATGATGGCTGAGCTGGGCACTTAGTCCAGGCTTAGCA<br>TTTTCTATAAGAGCCCTGAAGCTAGTTTCTGTTCCAGGAGCTGGAGCAACAAGTCAGGAGGAGGCCAAATGAACTCCTACCC<br>CTCAAACATGCACAGCGATTTCTGGATG CATTGTGGGGAATGGGGCTGCAATCTGCCGAAGGAAAAGATGGGATTCTGTCC<br>CCTAAGAAAAGTGATTACGAGATGCCAGCAAAGACAAATATATTTGTCCTGTTGCTACAATAGGAAGTTAACAATCTGGCA<br>AGATATCTGAACACAAGCAAATGAAAACAGTTACCTAACACCCATGCAAATTAATAATTTCTCCCATATACAAAATGATGAG |

|    |                 |                                                                                                                                                                                                                                                                                                                                                                                                                                                                                                                                                                                                                                        |
|----|-----------------|----------------------------------------------------------------------------------------------------------------------------------------------------------------------------------------------------------------------------------------------------------------------------------------------------------------------------------------------------------------------------------------------------------------------------------------------------------------------------------------------------------------------------------------------------------------------------------------------------------------------------------------|
|    |                 | AAATAACAGCAAAAATGTATACTTTCTATTTTTGAACTTTTAAAGTTCTAGTTTGGTCTTTGATCAAAACAAAGTAAAAGATGTTTATAA                                                                                                                                                                                                                                                                                                                                                                                                                                                                                                                                             |
| 21 | <b>GAD2</b>     | CTGAGGAAGGGCCTTCCAAAGCGGCCCTCCCTTCCCATTCACTGGCTGCCTCCTTTGTAAGTAATGACTGTAATTATTACCTCCCAGAGCTCTTTTGTATCTCCAACCCCAAGCCCCGAGAGGGGGAATGGCTCTTTAGTGAATGAAAGTCATTA<br>CAAAGCAAATTACCGTCTAGGGAGGGACAGCCTTCAGGAAAGACAAATCAGATCTCCATCTGCATCTGAAGTAGGGTGTGT<br>TTAAATAAAAAATGTAATATCACCATTAGATCCAAAGTACTCCAGAGCTGTGGGATTAATGGAGTTAAACGGTAGCACTTG<br>AAGCCATTGCTTTACCAAAAAG                                                                                                                                                                                                                                                                        |
| 22 | <b>SIGIRR</b>   | ACAGCCAGGATGGGGCACGGCAGGATCTGGCGCCAGAAGTCAGAGGGAGGCCAGGAAATTTGCGCCAGTTTTCCCTG<br>CCTTGTGGCTGCCTGAGGAGCCCTCACTCCCAGTTCTGTGGGTGCCAGGGTCACCCAGAGTTCAAGTCAGGGCTGTGC<br>CAAGCCTGAGAGCCCCCAAAGACGGAGCAGGCGAATAGGGTGGCAGCTCACAGCCCTGAACATACAGGGGATTCTCT<br>GCGGCCCCACATGGGCACAGCCTTCTCACAGCACCCCTCAACACGCACAGCGGTGGGCTTGTGGGAGGTGCTGGTGGT<br>GGCA                                                                                                                                                                                                                                                                                             |
| 23 | <b>C11orf42</b> | GTCTATTTGTGTAGGATCCTTGACACCAAAGGAGCAGTTAGTGTGAGATTCTGATGTCATGCTTGGTGCCTCTGATTTTCATG<br>GTCATGGGGCAAAGCATTGCATCCAAAATGTCAACCCACCAGTGTCTGCTCTCTCCCTGAAACGCAACTGGTCCCTCT<br>CAGAGCCCCACCCAAAAGGAAGTGTTCAGTGAAGCAAAGGAGAAAGGAATGTTGGAAACTGTCCCATGCAGACCACA<br>AAAGAACATCAGTTATTCCTCAGCCAGGTGACAAGACAGTAGTCTACAAGCTACCTCAGCTTATCCAAGGTGCAGATGCAA<br>CTCCATAGTTAGCTACCTTCTTATGCTAGGAGGCAGTACTTCCAAAACAGCTTTGATAGAAAAGCAGATCAGCCTTAAGG<br>AGCCACTGGTGAATTCTACCAGAAGGCCAACAAAGAGGGCAATGCCATCAGTAGGGGCATAGATGTGCGAAATTTGGTCTC<br>GGAGGTAGGGAGTAGAGTACAGCACTGTAAGCACTGGGCTCAAAT                                                                  |
| 24 | <b>C11orf11</b> | CACCATCTATCTGTAGTCACGGGGTCTGCCTTCTCCCTGGGTTGATGGGTTCACTCCAGGGTATCTGGGAGTTGCCTCTC<br>TTCTTATGCTGGGGAGCCTTTGGGTCCAGAGGATTGGATCGATTGGGGTATGCTTGAAGATGATTCTGCAGCCACTGG<br>GAATCTGCTGGGGCCACCGGGACTCCCACCCCAAGGCTAAATTCCTTTCCAAGGGCTCTGTCTGTCTCTCTGCTTAGCT<br>CCTATGTTAAAACCCCTCCATCTGCGCTGAGATTGTGTTGCTCTCACCAGTCTTTGGGAAGCTTTGGGTGAAGGTCTCAC<br>TCAGCATCACCTAGTGCCTTACTTTACAGAGAAGCAATTTGCAGCTCCTCCTAGAGAAGTCTTACAGTGTAGGGGAAATCTT<br>CAGTTCTTGTG                                                                                                                                                                                         |
| 25 | <b>HRASLS2</b>  | GAGATTCATGCCTCCAAATTGGGAATGATGGTTGCCGGGACAGGCAAACATTTCCACCAACCTCAAACCCCATGGCCCTAG<br>AAAAATCGTATTATTGGAGGCACTTCTACCCTGAAACAGAGTGAGCCTGCTTGGACAGCAGTATAGAAACCACTCCC<br>CTTTCTGCCTCTCACCCACAGTTCAGAAACTCATTCCACACCAAATGAAACCAAAACCCAGTACTGGGTGTGTAGAGG<br>TTGCTTCTTTGAGGCACCTGCATGCTTATCTCACCAAGCTCAAATAAGTATCTTCTGTCTATCTACATATAGTTGTCCGGT<br>CCTGAGCAAACCTGGACAGGAAGGGGTGGGTGGGGCTGGGGGGAGCTGAGCATCCTCACTGTGGGGCATGGGGGCGAG<br>GACCAATAACTTACCCTTTCAGGCTATAACAACAAACAAACAAAGAGCTTTAGTGTGGGATGCAGATGGACTGGAGCC<br>AGAAGTGGAAAACCTTTGGGAGCCACAGCAGTCTGCATGACCAGTACTCCCTCAGCTCACGTGGTGCATGTGGTCTTGC<br>TCCCATGGAGACGGCCTCTCTCAGCACCTCCACT |
| 26 | <b>OR2AT4</b>   | TACTATGCAGCTGCTCAGCTCTTATTAAGTTTCTTTCTTGTATGCCTTGACTAGTGGTCTTTCTGACTCCATTTAAGCTAGG<br>TGTCTGGACTTCTGCTCCTGTATTGGATATAATAGACCATGATAGCCCAACACTTTCACTGCAATGATTAGGGAAACCTGGAT<br>AAATTACACAAATCACATTTTAAACAAATTGAGGAATATGGGTGCCATAAGGATGAGATGAAGGCAAACCTCAATGGGTGGG<br>GACCCTCCAAAGTTAACTAATAATCACCAGCTCTTTGTTCTCTGGGAATATTTGATTTGGGGACCATGATGTGGCTTAGACT<br>TGGACCAGGC                                                                                                                                                                                                                                                                    |
| 27 | <b>OR8B8</b>    | ACATACCTCAGAGCTTGCTCCTCTGCCACATGTGAATGATTTTAGTCACTGCTCAGAAACAAGATGCCTCAAGTGTAACT<br>CTTATACCTAGAAATCTGCCACTCCCTCAGTGATTATGAGAACTCAATCCTTGCTCTCATTCCACTGTAGTCAACTCACA<br>ATTTAAGAAAATAAGTCATTATTACAAGCATGAAATGAGTCCCACAGGAAAGGTGCTCCTTAGGGCACAGAAAGCAAGACTC<br>CGGCTTCATAAAAGTTGACTTTTCTCTGGGAGCCTTAGAGGATTCTGTTGGATGGTAGAACACCAAGAAAAGTTCTTC                                                                                                                                                                                                                                                                                           |

|    |              |                                                                                                                                                                                                                                                                                                                                                                                                                                                                                                                                                                                                                                                                                                                                                                                                                             |
|----|--------------|-----------------------------------------------------------------------------------------------------------------------------------------------------------------------------------------------------------------------------------------------------------------------------------------------------------------------------------------------------------------------------------------------------------------------------------------------------------------------------------------------------------------------------------------------------------------------------------------------------------------------------------------------------------------------------------------------------------------------------------------------------------------------------------------------------------------------------|
|    |              | TGGATGTATGTCATTTTAAAGCCTGTTGCCATGGAACTACTCTTCAAATCCTCTCAACTGGGGCTTTACTAAAAGCTTGTT<br>GCCTGAGGAGCAGATGAAGCCCAAGCAGGAAGCAGTGTAGGAAGAATACTTCTTAACTCTGTTCCCTTTTGTGCAGAACTG<br>CCCTCCTTCCAAAACCTGGA                                                                                                                                                                                                                                                                                                                                                                                                                                                                                                                                                                                                                              |
| 28 | <b>ESAM</b>  | TGTAGCCTCAACATT <b>CATTCC</b> CTGTAGCTAACTTTTCTTCAGAATTCAGATCCCAAATGACTTGTGACATGGGAAGTAAAGC<br>TGCAACCAATGATTTGTAGTCAGTGAATGTCTCCATGTGACACAGGGGCAGTCTCTCAAGATT <b>CTTTG</b> ACCGTAAAGAATT<br>GTCCTCACTGTCTCCTGTCTCCTATTTTCAGCTATTTCTTTCTTCTGACCCTGAGGGCAGTCAAGTCGTAGAAGTTAGCAGAG<br>CAGCTCCATTA <b>CTTTGT</b> GAAAGTTTTACCAAGATGCATTTTAGGGTGGACTGCTCTCCACCCTGGTGAAATCATGAATGCT<br>GACACAGATGATCTATGTGCGACCTGGGAACCTGCTTACATAAACGTGTGCAAGAGCTAGTTCATAGTTTCATATGTTAGAGAC<br>TTGCAGGTCATTAGTGTCTTCCAATCACATCTCATGTTAGATTCCGAAAGTAATTCCTAATATTACCTTTACATTTGAATATA<br>CTTTCTCTGTCCCCCTGAATCAGTTATAAGGCTTCATTAAGGTCTAAATATTCCATTTCTATTTTCGGCAGTGCTCATAGTTA<br>TCTGACATCCTGCTATCTTCTTTTCTAGACTGTTCTGGCCAAAGAGACTGGAGATCCAGTATCAGCAAGCTACTTTCTTGGTA<br>AACCTCCATTTCCCAATGCTCAT <b>CTTTGT</b> CCTCTACCCCCACCCATCCCAAGGCAAATGATGAAAAC |
| 29 | <b>PKP2</b>  | AGAGATCCACGGAGAGGGCCTCCAACCTTCAATCGAATCTTCCACAACCTGTATTATCGTGCTATTAATTATGTTTCACCGC<br>AGTTGACTACTGAGAACTTGAGAGCTAAGCTCAACAGAAAGGATCCTTGACCTTAAAGTTTACAACCAAAGCCACTTGTCT<br>GATTTGCCTCTTTGGACTTAAGAGGCAGAAAGAAAACATGTATCCCTGGTATTAAGATAATATTCC <b>CTTTG</b> ATTGCTTGGGTT<br>TGTATGTTCACTTTCCCTCAAATCACTCAATTGCTGCAAAACCCCACTTACTCAAGTCTGAAGTGTGGAGAACGCAGCTT<br>CCCTCGT <b>CTTTG</b> TTTTCTACCCACACCCTTCTGCCTTTAGACACACACTGAATGCTTAGACAC <b>ACAATG</b> CACAGGTATATGG<br>CCTCCCTTTTACATGAGCGTCCAGGGAGTGAAGAGGAAACCAAAGGACTGAAAGCGTGGACAACAGAGTAGTGACAGTT<br>CCGCCACC <b>CTTTGT</b> CAGCAGGCCACATGGCTAAGTGGGAGCCATATGGATGTGA                                                                                                                                                                                                   |
| 30 | <b>ESPL1</b> | GCCTCTCTGTGCCCCATTTTCTCCTATCCTAGTTAGTTCCCTGGCATGCCTGGACCATTAACCCCTAGCTCCCTTCTGTTT<br>TTCTCTGTAACCAAGGGCCAAAGGAGTTTCTCATTGGTTCAATCCTCTCCACTCACCCACCCCAACCAATGGTGT<br>CCTATGTATTCTGTTTTAGAGCCCTTA <b>CTTTG</b> TATTTCTCCTTTTCTTTTCCAGCCCCCTGTTTCTGGGTAATCTCTGGGAT<br>GTGACTGACCGCGA <b>CATTGA</b> CCGCTACACGGAAGCTCTGCTGCAAGGCTGGCTTGGAGCAGGCCAGGGGCCCCCTTC<br>TCTACTATGTAACCCAGGCCCGCAAGCTCCCCGACTCAAGTATCTTATTGGGGTGCACCTATAGCCTATGGCTTGCCTGT<br>CTCTCTGCGGTAACCCCATGGAGCTGTCTTATTGATGCTAGAAGCCTCATAACTGTTCTACCTCCAAGGTTAGATTTAATCCT<br>TAGGATAACTCTTTTAAAGTGATTTTCCCCAGTGTTTTATATGAAACATTTCTTTTATTGTTAACCTCAGTATAATAAAGATACAT<br>CATTTAAACCCTGTTTTGCGTAGTTTATCTGAGAACATTTAAAGACACGGCATGACTGCCCCCTTCTACTATGTGGTACTGT<br>AAGCTGACAGGAACAGGTTACAGCAGATCAAGTTTGAG                                                              |
| 31 | <b>SHMT2</b> | TTCTGAGAATGCTGCCTCTGGCTTTGCCAGGCCTGGTGCTGAGTGAATGGAGCTTTCTGCAGGGAGTACTCCCGCTTT<br>CAGCTCTGGCTCTGGCAGGGAGGGACTGTGGGAGTCCAGGGGAAGGGCTCAATACCTTCTGACATTGCCCCCCACCAC<br>CCCAGAACTTCTGCAGCCGAGCTGCGCTGGAGGCCCTGGGGTCTGTCTGAACAACAAGTACTCGAGGGTTATCCTGG<br>CAAGAGGTGAGGGCTGGAGGGCAGTGTGAGGGATGGTCTCCAGTGGGGGAACCCACCTGTACCTTCCAGTGT <b>CAT</b><br><b>TGAG</b> GGAGTGAACCTCCAGTCTTTGCTGATGGTTGAGAGTCCTTTCTGTGCCCTCATTACCCCTCTCCACGGCAGAT<br>ACTATGGGGGAGCAGAGG                                                                                                                                                                                                                                                                                                                                                                     |
| 32 | <b>ASCL4</b> | CTCGCCCCGGGTCTTCTTGACTTGACACATTTTATAACCGCAAGAGAGCAGTTTTTCT <b>CTTTG</b> ATGAGGCTAAGACCCAGAA<br>AATGAAAGAGCAAGTTTAAAGTTTGAAACACTCTAAAAGCTCCTTCCATTAGACCTGGTCGCGGGAACCA <b>CAAAG</b> GACAG<br>TCAAGTGATTTTCAAGGAGAAAGCCTCTGGTCCACTTTCCCTCCGCCGACAGATCTGCAGGTTCTGGGAGGAGCTCTTCT<br>CAAATCCTGAAGATTGCTAGGCTCTTGGCGAACGACTCATCTCTGAAGACCTAGAGTGGTGGATTACAGG <b>CATTG</b> AAAAG<br>CTTTTGGTGGCTTTGGAAGATGACTCTGGTGTGAGCTCACCTTTCCAGGCTGGGGGACCAGGCAGAGGAACCC <b>CTTTG</b> T<br>TATCTTCTGAAAGAAGATCAGTGGGGAAGACGGGGTTGAAGTGTGGATTAGGAGATCCTACGTCTTTGCCTACCACCTCT<br>GCCTAAATCATAAAAAGATCGAGGAGTGAATGAACCTCAGGAATCATGCACCGTTTCCCTGAAGCCTGTCCAGGAACCTAA<br>CTTCTGGACCCAGAACTTC                                                                                                                                                       |

|    |                 |                                                                                                                                                                                                                                                                                                                                                                                                                                                                                                                                                                                                                                                                                                                                                                                                  |
|----|-----------------|--------------------------------------------------------------------------------------------------------------------------------------------------------------------------------------------------------------------------------------------------------------------------------------------------------------------------------------------------------------------------------------------------------------------------------------------------------------------------------------------------------------------------------------------------------------------------------------------------------------------------------------------------------------------------------------------------------------------------------------------------------------------------------------------------|
| 33 | <b>KIAA0774</b> | <p>CGGGGGAAGCGGGGGCCTGTGTTTTTACAGTGTGCCATGGCCTAAGTGACACCTGTAATGGAGCAGAAAAGAAAAGATATTT<br/> CCTTTTTTAAACCAGTGATTTATTTTTCCAACAGATTGAAAGGTTTTGGACAAAGATTCCATGAAAACCTCCTATAAACAGGAA<br/> TTGGACAATTAATACTGTTGTAATCAGCCTTCTCCTGGTGGGTTTCATAGCTCTGAGCTTCAAGTAAATACGGTTTGATCAA<br/> GAATGGCCTTTAAATGGGAGTGAGCCATTGTGCACCACGTCCGTTCTCACACTGCGATGCAGCTTTCCTAATGCCATGGGT<br/> CTGCTGTAGTTTTGCTCAGTGATATTTGTTTTAGTGGATGAAGTTCTCATTACCATAAGAGAGAGAAGTCAGGATAATTGTT<br/> TGATGAAATTATAGTATGCAGAATGGGAAACCACCTTTTTTAAAACAAATATATCCTCACGTGTCAACTTCACAGTCAGGCTT<br/> CCTTT</p>                                                                                                                                                                                                                                   |
| 34 | <b>ESD</b>      | <p>CGTGGGCGCCCCCTCCAACCTCCTGCCTTCGCCCGCCTTCTGCTCTGTGTGTTACTAGGACCAACGAGGAGGGCGTTAG<br/> GTTAGTCCCTGTCACCTTGTGCGGGATCAGTCTGCTGTGCGTGCTCAGACTTTCAGAGCCAGCAGCAAGAACCCGAG<br/> GCATTAATAAACTTGAGATGTAGCTTCGCTTAACTCGTGCAGAGGGTTCCGTGTCACTTATGTAGAACTAGGGCCTAATTT<br/> CAACTCCCTCAACTCCTCTGTCCCAAGACTATCCAGTCACCTACTTGGTAGCTTGAGTTAAACAAGAAACCTTTGAAATCT<br/> CCAGTGGCCGACACGCAGTGGGAACTCCATCAG</p>                                                                                                                                                                                                                                                                                                                                                                                                   |
| 35 | <b>CHX10</b>    | <p>AATACATATTAGTCGAATGAATTGGGTGGAAGAATCAAGTCCCTCCATGAAAGTTGGGCATGCTTCATGCTTACTCTAGGAAG<br/> AGGTTTGGATGTCCATGGTTGTTCTCCAAAAGTAATCATCACTGTTCTCTTCCACCAGGGACCCCTCTTTCTGACCCAT<br/> TTATCATTATTATTGGGCCAATATGTGTTGAGTAGCTTCCGAACTAGGCATTATACCTTGTGCTGGGGAAGCAAACCTTT<br/> CCCTACCCCTACATCACCTCTGCACACCTTGGCCTGATCTTTCCAGCTTACCACCACACACTGCCCCAGCACTTACC<br/> TCTCCCTTGTCAACCGTTACACAGAGGTGCCATATTCAGGCCGCCCTGATGCTGCCAACCTGCATAGGAGTTGAGGGAA<br/> GGAGGTCTCCAGTCTCTCACCTCTGCCCTTAGCCCATCCTTCCACCTGACCTCAGGGACCTGTCCCTGCCAGAATCTGC<br/> CCAGAGCCCCAAGCCACTCTGCCTCCCGAACAGCCCTGAACCTGAACCTGGTTGTCTCACTTCGCCCCCTGGGGTCCC<br/> TGCCCATGGGCATCCTGCAGAG</p>                                                                                                                                               |
| 36 | <b>OR4F15</b>   | <p>GTTAGGTGGCTCATGTGACTGGCTGAAATCATATCCATTGATAAGAAATCATAGTAAAAGTATTTAAAGATGACCTTATATCT<br/> CACCCAAATAGAATCCTGGGAAGGATCAAATAGGAAATATTATGTAACACAAAAGCAGAGGAGAGCTAGGTCTAAGGAT<br/> GGAATTAATTTAGTAGTAGTATTTTAAAACCATAATGCCAAATAGCAGCCAGCTGACCCCTCTAAGTGAAGTCCAGGGT<br/> GCATGTGATGAGGGTATTTGGCTGTGTAAGATGTTAATATGATGTTATTTTTCATGGCTGGAGGCTTTCTTTCTTGAACATGA<br/> ATACTTGCCTAGGTAATCTTTCTCATTCTTTCTTCTCAGGTAAGTAACATGAAAAGTATGCTTGGAGTCTGAGGCAATG<br/> AATGGAATGAATCACTCTGTGGTATCAGAATTTGTATTTCATGGGACTCACCAACTCACGGGAGATTGAGCTTCTAC</p>                                                                                                                                                                                                                                                            |
| 37 | <b>SLC6A4</b>   | <p>TTTTCCCACTGCTCTGCTCTCCCCAGGTTCCCATCTTCATGCCTACAGTCAGCTACTATTTTTATAATCTACAAGTAACT<br/> ACTTGAGAGGCTTTAGGGGTACAAGGAACAAGATAGGGCCTCTGGCCTCAAAAATCTAACATCCAGGAGGAGATAGGAGG<br/> GCCAGCCATGCGTGGTTTGGAGTTGGTATTAATGTCATGCTGTGGATCTAATCCAGCTTAAATCTGCCAGACTGGTAATTA<br/> AGATTTAGGACTTAACGCTGATGCCCTTCTCTGACCTCACACAGGTCCAAAGGATCAGAAGCATCTGGGACTCTGAAGCCA<br/> CCTCCAAATTTTCCCTTACGCAGGCCTACCCTCGTGGACTCTTCCAGCAGAACTTCCAGCAGGAGTGAAGGGACTCAG<br/> CACAGGGCTGACGGCCATTCCCTCACTTCTGGCTGGGGGAGGACAGAGCCTGGAGAATGCAGGATGAGAAGGAGGCCCT<br/> TCAATAAATGGAGCGCTAATGATGCTGGAGATCTGTGAGGTCAGGTTTGGGAGGGCTTACCCAGCTTACAACCCGGAGA<br/> GCCTCAGACACGCTGTCTTCAGCTTTTGGCTTGTGGAGATTTGACTTTTTTTTTTTTTTTTTTTTTTTTGGAGACAGAGTCTCG<br/> CTCTGTCGCTAGGCTGGAGTGCAGTGGTCCATCTCGGCTCACTGCAACCTCCACCTCCAGGTTCAAGTGAT</p> |
| 38 | <b>RIOK3</b>    | <p>TCTCTGCCTTCAATCGAATGGATCTGGTAGGAGTGGCATCGCTGAGCCCGGACGGCAGCGGCTGGGGACCCAGC<br/> AAGGTAAGTGGCAGACGAGACTGGAGTACTAGCCTTGGTACACGGGCTGGATCTCTCGAAAAGCTCGGAGAGGGCGGC<br/> TTCGTGGGCGATTTCGGGAAGTTCTGGGGCGGGACCCCGCGGACCTCGGCAAGGGGGCACTGGCCGCGGGGGTGGCCGG<br/> GATGGGGATGGAGGGAGCGGAAAGAGGGGCGGAGGGCGGCTGGATCTCCAAAGGCCACCTTGAAGTGGTTAGGGCTCT<br/> CTATTTCTTCAGCGTACTTTCTGTATCACCGTAGCATGATTTGAGCAGGACTGGCTTACACACCCTGATGATACTGGAGGGG<br/> AAACAAGCACGATCTTGTTTTTCACTGGCCAAGTGAAGTGCAGCCGAATACACAGCTAGCCAGACAGAAAAGTTGGTTAGGAA<br/> GCTGTTTACTTAATTTGATAAGTGTGGTTATCCAGTTTGGAAATGTCTGTTTTTGAAGCAGTAAAAGATAAAACCCAGGCG</p>                                                                                                                                                                           |

|    |                 |                                                                                                                                                                                                                                                                                                                                                                                                                                                                                                                                                                                                                                                                                                                                                                                                                                                                                                                                                                                                                                                                                                            |
|----|-----------------|------------------------------------------------------------------------------------------------------------------------------------------------------------------------------------------------------------------------------------------------------------------------------------------------------------------------------------------------------------------------------------------------------------------------------------------------------------------------------------------------------------------------------------------------------------------------------------------------------------------------------------------------------------------------------------------------------------------------------------------------------------------------------------------------------------------------------------------------------------------------------------------------------------------------------------------------------------------------------------------------------------------------------------------------------------------------------------------------------------|
|    |                 | CACCCTCCTCCCTCGA                                                                                                                                                                                                                                                                                                                                                                                                                                                                                                                                                                                                                                                                                                                                                                                                                                                                                                                                                                                                                                                                                           |
| 39 | <b>ST8SIA5</b>  | ATACCTGATGTATCCACCTCACCCAAAGGATGAGAAGAGGGGCTGTTTCGTTATGGGAAGTTTAGAGAAGAAGGTGGGATG<br>CTTACTTAGCTAGAGAGACATTTATTTTCTATCAACCTAGGGGAGGGGCGGTGAGAGTAGGGAGACACTAGCAGCAAACCTA<br>AAAAACAGCCAGCAGCTAGGAGAGAGGGGCTCTTGCCAAGAGAGGGCTCTGATATGGGTGTATCCTAGAGCAAGAACCTCC<br>CCTAATCTCTCAAACCAGGCGGAGGAACCCCAAGTGTTCCTTAAGCCAGCAGAGCCGGCAGAAGGAAGTGGCTGGCATT<br>TCAGTGTATCTTCTGCAAATAGAGAGGGCTGAGGCTGTGCCCGAATTGAATTTCTGAGTGACACCTCCTACTGCTCTTTCTCT<br>TGGAGTTTAACCGTGGATTGGGGTGGAGTAGGGGGAGAGCCCAAC                                                                                                                                                                                                                                                                                                                                                                                                                                                                                                                                                                                                                    |
| 40 | <b>NFATC1</b>   | GTTGGGGCTGCAGGGAGCCCTGTTTCATGCCGCTGCACTCCAGCCTGCAAGACAGAGCAGAAAAAAGAATCAGGATCCTG<br>GGCAGAGGGAGGAGAGGGGACCGGGGTCCAGCAAGCACTTGGGGATTGACTGAATGGCGTTGGGGAGAGATGACTCCA<br>AAGTCCTGGAGTGGGTGAGAATGACTGCGAGTGGCTTTTAGGTGGGGAGGTTCTGCCTGGCCACTCCGGGAGGGGACG<br>TGGGGCTGAAGGGTATCAGGTGCCGTGCTGAGCAGTTTGGCCTTGATCCTAATGCCCTGGACACACGTCTAGGGTAGGAA<br>AGTTGACTGATCCATTGGTGATCTGAGTTTTAGACATGGTGGTAGTCCATGAGGTGGGTGTTTCATGCTAAGAGTTTAGACA<br>GGGAAACCTATGAAGCCCTTAGCAACCTCCAGGGAAGGGGCGTGGTTAAAGAGATGTTTCATAAGTAACAGCATGGTATA<br>GAAACTCTGAACCCCAAATGTATGGGTCCCTCAGGAACACCCAGACTTTAGAAGGAAAGTCAGAAGGTGCTGACACGGGT<br>GTATAACTAAAGGAAATCCTTCTTTCTCAGCTCCAACCATGGCTGTGAGGTTCAATCAGACTGACTTAAAAAAAAAATCTC<br>AGTTTACTTAAAGTAAATAGCTTTTTCTATAATTCTGGTTTGCTAATTAATCCTAGTCTCCAGACCCTGGCTAAATAAATGCC<br>CATTCTCCAGATGGTCTCAAGAGTCTCTGGACATCGTGGGGGCCCTCCCTGTTGGTTGGAAGGTGCCTCAGGAAGAAG<br>GGGGTGGATTCTGAG                                                                                                                                                                                                                    |
| 41 | <b>CD97</b>     | AGCAGCAGGGGCAGCCCCAGAGACCCAGTTCTTGCTCCCCGCAGACCTGGCTGGGGCTCAGCTGCGGATCGAAGGG<br>ACTTTGCCTGGTTCTGGGTTTGAATTTGATTTTTGTTGTGACTTCTGGGACTCCCTTTCCCGCCCCACCCAAGGTGACTGT<br>AACGGTTATCAGGGTAGCTCGTTGCCTAAGCAACGGGGC <b>AACAAAG</b> AGAGTGAAGAAATGACATTTGGGGCAAAAACAG<br>AATTCCTGGACCACAGGGACACAGCTTCCCTGGGCCAGCCCCAAGTGGCAGGTGTCAGCTCAGCACCCCGCCTTGGCT<br>TGAGAGTGAGAGACAAGAGCCACCTTGGGTTTCTTGGGGGCACACTTGTGGGGGCAGTTGCCAAGACCTGGCTTCCC<br>AAGGGTCCACGCCCTGGCTGTCTGTGTACCAGGGCCAAGTCAGAGAGCCTCTGCGCCTCACTTTTCTCATCTATAAAAT<br>GGAGACAACCCGTCTCCGCTTAGATTGTTTTAAGGGATGAGTGAAGTTAGGACACAACTATTCTGGTTCACAGTAAGAA<br>TTAGGTAAACAGCATTTTAAAGTGTGGCTGGGCACAGTGGCTCACACCTGCAATCCAGCA <b>CTTTGA</b> GAGGCCGAGGCA<br>GGTGATCTCTTGAAGCCAGGGACTGGAGACTAGCCTGGGCAACACATCGAGACGTTGTCTCTACCAAAAACAAATTTTT<br>TTTTTTTTTTGAG <b>ACAAAG</b> TCTCGCTCTTGTGCTCAGGCTGGAGTGAATGGTGAATCTCGGCTCACTGCAACCTCCG<br>CCTCCTGGGTTCAAGCGATTCTCCTGCCTCGCCCCATCCACCCGAGTAGCTGGGATTATAGGTGCCTGCCACCATGCC<br>CGGCTAGTTTTTTGTTTTAGTTTTGTGTTTTGATTTTTAGTAGAGACGGGTTTACCATGATGGCCAGGCTGGTCTCAAAC<br>TCCTGACCTCAGGTGATCACCCGCTCCGCTCCCAAAGTGTGGGATTACAG |
| 42 | <b>TMEM161A</b> | TTGCTTGACCCATGAGATCAAGGCTGCAGAGAGCTATGATTGCACCACCGCAGTACAGCCTGGGCAATAGGGCAAGACA<br>CTGCCTCAAAAATAAAAAATAGGCCAGGCGCAGTGGCTCATGCCTGTAATCCCAACATTTGGGAGGCTGAGGTGGGAGG<br>ATCACTTGAGGTGAGGAGTTTGAACCCAGCCTGGCCAACATGGTGAACCCCATCTCTACTGAAAATACAAAATTAGCCGG<br>GTGTGGTGGCAGTCGCCTGTAATCCGAGCTATTTGGGAAGGACGAGAATCGTTTGAACCCGGGAGGCAGAAGCTGCAGTG<br>AGCCGAGATCCCGCCACTGCACTCCAGCCTGGGCAACAGAGTGAG <b>CTTTGT</b> CTCAGAACAAAAAACAACAAAAAACA<br>CCAATAATAAAAAACAAATAGGCCAGGAGCGGTGGCTCACACCTGTAATCCAGCACTTTGGGAGACCGAGGTGGGT<br>GGATTACCTGAGGTGAGGAGTTTGAAGCCAGCCTTGCCAACATAGTGAACCCCGTCTCCACTAAAGATACAAAATTAGC<br>TGAGCATGGTGGCACATGCCTGTAGTCCCAGCTACTCAGGAGGCTGAGGCAGGAGAATCGCTTGAACCTGGGAGGCAGA<br>GGCTGCAGTGAGCCGAGATCGTGCCATTGCACTCCAGCCTGCATGACAGAGCGAGACTCTCTCTCAAAAACAAAAACAAA<br>AACAAAACAAAATAATAAAAAAAGTAAGTAGAAAAGAAAAAGAAAAAGACCTGAGTCTGGGTTGGGTGAGCGAAATCTCTA<br>GCCGCACTTGACACTCTGCAGAGGCTTCAAGTTCACCCCATCCAAGTCT <b>CATTCC</b> CTACAAGCTTCCACAGCACAGAGGA                                                                                                                                           |

|    |                                  |                                                                                                                                                                                                                                                                                                                                                                                                                                                                                                                                                                                                                                                                                                                                                                                                                                                                                                                                                                                                                                                                                                                                                                                                           |
|----|----------------------------------|-----------------------------------------------------------------------------------------------------------------------------------------------------------------------------------------------------------------------------------------------------------------------------------------------------------------------------------------------------------------------------------------------------------------------------------------------------------------------------------------------------------------------------------------------------------------------------------------------------------------------------------------------------------------------------------------------------------------------------------------------------------------------------------------------------------------------------------------------------------------------------------------------------------------------------------------------------------------------------------------------------------------------------------------------------------------------------------------------------------------------------------------------------------------------------------------------------------|
|    |                                  | TGAAATGGGAGCTTCCAGTACCCACGGCACGCTCTTCCCTTCACCTCCACCTCCGAGCCGTTCTGGAGTCTGGTGGGT<br>TTGCCTCCACGCACACACAGAGAGTGATCATTCCAGGGGGCACTGCCTCCCCTCAGCTCCAATGCCCCCTGCCACGGGA<br>GCCTGGGGAGGGGCTTTTACACACTTTGATCATGCCATATCCCTATCTGGAACTGGGGCCCCAAAGCCCCCACCTCACT<br>GGGGATGAGGGTGGCGAAGATGACGTAGGACAAACCTTAGCTGGGGTCTGGGGTGCAGATGGCATCTATACTCCGCCGT<br>ATAACAAGTCCCCCTCCGGTTCTGTCACTTATATACCTTGTCCAGTCTC                                                                                                                                                                                                                                                                                                                                                                                                                                                                                                                                                                                                                                                                                                                                                                                                              |
| 43 | PEPD                             | ATCCAATTATCGACATTCAATATAAGAAATAAAGTTCTGAAATGGTTTTCTCAGCACATGCAGAGTGAGCCGACCAGGTTGG<br>GCAGGTGATAAATACTTTTATTCTTACGAGTGGGTATCACCGCGGAGTGGCTAGAAGCTTACCTTTTATTGCCTTACCTT<br>TTATTACATTTCCACGTTGTGCAGGGCTATTATTGGTAATTTATTATCCCATATCAAGATCTTGATTAATAAGGATGAAA<br>TTTCTAATTTCAAAGATATGAGTGCAAAGTCCCAGAGTAGGAGGATTGGTCTATACCTTGTGACCTGAAGAGTAACCCTC<br>CAG                                                                                                                                                                                                                                                                                                                                                                                                                                                                                                                                                                                                                                                                                                                                                                                                                                                     |
| 44 | TFPT                             | AGGTGATCTCTGGAGTTTTGCAGCTGGGTTCCATACCTAGTTTGTTCAGATTAGCCCCGCGGCGAGGCGCGGTGGCT<br>TACGCCTGTAATCCCAACAGTTTGGGAGGCCAAGGTGGGTGCTCACTTGGAGTCAAGAGTTCAAGACCAGCCTGGCTTA<br>CATAGTGAAACCTTACTCTACAAAAAAAAAAAAAAAAAATTAGCTGGGCATGGTGGCAGGTGCCTGTAGTCCAGCTACTC<br>AGGAGGCTGAGGCAGGAGAATCGCTTGAACCCAGGAGGTGGAGTTGCAAGTGAAGCAAGACTGCGCCACTGCACTCCA<br>ACCTGGGTGTGAGCCAGACTCCATCTTAAAAATAAATAAATAAAGATTAGCCCCGGAACCTTCTAAGTAAGCACATAGAT<br>AAGCCAGCAGTGAAGACAGTATCTAGTGGGAAAGGAGGGAAACAAAGAATTTCAAAGTATGTTTTCAAGGTAAAGGCAA<br>GAAAGGAATAAGAAAGTTTGCAATGCATTTGGAATCTACACCCTTGGTCCAGTAAGTCTTAGCAAGGTGGCGGTATAG<br>GGGTGTGCTGCGTCTTGACAGGTGCGAGCTGGAGACTCGCCAGTGAACAAAAAACTAAAGCACCTGTTGTCGTGGA<br>GCCTGCATGCTAGTGGGGTTGATAAAGAAGGACCAGGGTCTTCTGGGGGAGAATCATCGCTCAGTAATAAGGAGGGACTTT<br>GTGGGGCAAGTTTTAGGGAACGCTGCTGCCCTCCCAGGCCCTCGGGATGTCTCTGGCAGATGAGCTTTAGCTGATC<br>TCGAAGAGGCAGCAGAAGAGGAGGAAGGAGGAAGCTATGGGGAGGAAGAAGAGGAGCCAGCGATCGAGGATGTGCAGG<br>AGGAGACACAGCTGGATCTTCCGGGGATTGAGTCAAGACCATCGCCAAGCTATGGGATAGTAAGATGGTAAGAGGACAAG<br>AGGTGTTCTAGCAGGGGGCTCTAGACAGAATCTCCAGAAGGGGGTGATACAGGCTCTTTTTGAAGAGTGTGGATTCT<br>GACTGTCTTCTCTTCTTCTACAGTTTCTGAGATTATGATGAAGATTGAGGAGTATATCAGCAAGCAAGCCAAAGCTTCAGAA<br>GGTG |
| 45 | SNRPB2                           | AGCTATTCGATCCTTATCATTCCCTTCTGACTGTTCTCAATAACTGGCTTCTCAAATCGTTCAGGAAACCACTGAGAATCAT<br>TAACGGGTATTGGAATGCCAGAGTACTGCCAAGGACAGGAAAATGCACTGGCTCTTTTTAGAAGAACCCTGGAAAAGT<br>GCATGCAGACCATTGCGGCTGAGTTGGCAATGGATGATTTCTTCTCACAGTGAATGTACAATAGCTGTAATTTAATTGTTAA<br>TAGAACACAACATGCAGTCTGTCTTCCAGGCCTCTGTGTTTCTTGGTATTTTCTTCCAGGTTGGAGTGTGTTTGTATAATC<br>ACATCTTATTCTTTTTAACAGTTATCAACTCTTGGTAGATCCCCTTATACAATACAGAGTATAGTTTATTCTCAGTAGTGTAG<br>CCATCCTCATTATTATCAAACAG                                                                                                                                                                                                                                                                                                                                                                                                                                                                                                                                                                                                                                                                                                                                         |
| 46 | PPP2R3B                          | GGCGGGAGGGAGACCTCGCCAACGGGAGGCGGGAGGGAGACCTCGCCAACGGGAGGCGGGAGGGAGACCTCGCCAA<br>CGGGAGGCGGGAGTGAGACCTCGCCAACGGGAGGCGGGAGTGAGACCTCGCCAACGGGAGGCGGGAGTGAGACCTCG<br>CCAACGGGAGGCGGGAGTGAGACCTCGCCAACGGGAGGCGGGAGTGAGACCTCGCCAACGGGAGGCGGGAGGGAGAC<br>CTCGCCAACGGGAGGCGGGAGTGAGACCTCAGCAACGGGAGGCGGGAGTGAGACCTCACCAGGAGACGCGGGAGTG<br>AGACCTCAGCAACGGGAGGGGGGAGGGAGACCTCACCAGGAGACGCGGGAGTGAGACCTCAGCAACGGGAGGCGGG<br>TAGGGAGACCTCACCAGGAGACGCGGGAGTGAGACCTCAGCAACGGGAGGCGGGAGGGAGACCTCACCAGGAGAGG<br>CGGGAGGGAGACCTCAGCAACGGGAGGCGGGAGGGAGACCTCAGCAACGGGAGGCGGGAGGGAGACCTCAGCAACGG<br>GAGGCGGGAGGGAGACG                                                                                                                                                                                                                                                                                                                                                                                                                                                                                                                                                                                                      |
| 47 | chrY:00923<br>2377-00923<br>2432 | CAATTCACAGAGACCAAGGAATGACCAGCTAGGTCCTTTCCCATGATGCCCCACGGCAAACACCACCTCCGAACCTCGTG<br>CCAAAACCCAGGCAGTCATGTTACGCCAAACAGCTGAATAAGCTCAGGTAGGAGGTGACTGCCTGCAGCTGGAGGCTTA<br>ACCTTCGTGAACCCAGAACCGCTGGACTGCAGTGAATGAGACACCTGTAGCCTGCAGGGAGAGGAGTCAGGAAGGTT                                                                                                                                                                                                                                                                                                                                                                                                                                                                                                                                                                                                                                                                                                                                                                                                                                                                                                                                                      |



|    |                                                       |                                                                                                                                                                                                                                                                                                                                                                                                                                                                                                                                                                                                                                                                                                                                                                                                                                                                                                                                                                                                                                                                                                                                               |
|----|-------------------------------------------------------|-----------------------------------------------------------------------------------------------------------------------------------------------------------------------------------------------------------------------------------------------------------------------------------------------------------------------------------------------------------------------------------------------------------------------------------------------------------------------------------------------------------------------------------------------------------------------------------------------------------------------------------------------------------------------------------------------------------------------------------------------------------------------------------------------------------------------------------------------------------------------------------------------------------------------------------------------------------------------------------------------------------------------------------------------------------------------------------------------------------------------------------------------|
|    |                                                       | CATGCCAGTTCCACCCTCCCACACACCAGCTCTCCTACCATGCTGGGAGG <b>CATTCC</b> TTACCGAGGATGCCAACACAGTGCT<br>CCTTCATGATGATTTCACTGTGAAATAAAGGTTGGGATGAAAGGAAATCATCCTGCCACCGGTAACCGGGATGGCTGTGT<br>CCTCCACCTGCCGGATCAAGGAGAAAGAGGATGGATT <b>CAATG</b> GGACCATCTCAACTAGCTGGGCTGAGGTGGCCTACTTG<br>CTGTAGTGAGCCATGAGTTTCCCTTTCCAGCTCTGCCACTGAGACGACCCTGGTCCCAGGGGACCTCAAAGTACTCA<br>GACACTGGACTCCTCCCACAGACCCAGGCTCCCCAGCCTGACCTGCAAATCCATCACGTAGCAAAGCAGGACTTCCGCAT<br>GCTTTCTGACCCACGCCGACATCTCGTGTGCCAAACAATCTACCTCTGCGCAAGAACTCTCCAGAGGATTGGGTGGGCAA<br>GCCTCGTGACGCCTTGAATTTGCA                                                                                                                                                                                                                                                                                                                                                                                                                                                                                                                                                                              |
| 48 | <b>chrY:00925</b><br><b>1441-00925</b><br><b>1499</b> | AAATGATCATAAAAACTGGCAGGAGTAGACGAATAGAAATGCATCTTAAAACTTGCTAAACCCTTCAAGTCTCCATAAGAATT<br>GTAATGGAAAATGGATCGGTCGGCAGCTTTTTCCATACAATTATGAACAAATTATTTCTTCATACATAGATTTGTTTTTCAAT<br>ATTCTAAGGAATTAACCTTTATATTAATAGTAGGTGATGTAAGAAAGCAGGCCTTTATCAAGATAACTGACACTGGATGTCCATA<br>CCATTACTCAGGTGGGCCTTAATCCCAGCCGGTTCCTCCCTGGACACACACTGAAGGTCCCCAGCCATTTGGCAATCT<br>CTTCA <b>CATTCC</b> CAGCCCTGGAGGTAGCCCTAAAATACATGTACCTGAAGAAAATAAAACATTGCCTCACACTGGAGCCCAGT<br>GTGGTCTCCAGATTCCGTGTGAGGTGGACTAACTTATATGGGAAGGCAGGGCAGCGGGAGTGAGGATGGCAGAGAGGAT<br>TACACATGTCAAGGCAGCCGGGTGTCATGAAACAAAACATGACTGGCCTGGGAGAAACACTGTGAAAGGACACAGACCTA<br>GGTGGGCCTCAGGTGGACATCCTCATGGAGAAAAAGGGGGCCCTGGTTGATCTCAAAAT                                                                                                                                                                                                                                                                                                                                                                                                                                                    |
| 49 | <b>chrY:00925</b><br><b>2280-00925</b><br><b>2324</b> | CAGCCCTAGGCTGCTCGCCTGGCCTCCTCTCTGTTCCGCCTCTAGGGCTGACCCTCTCTCCATGGGATAGAAGTGAATG<br>GATTGAGCCATAGGCCCTGGCTGATGATCTAGGGACTGCAGAAGTGGGTCCAGGACAGTTCAGGTGACAGTT <b>CAAAGCC</b><br>AATCCCCAGAGACCAAG <b>GGAATG</b> ACCAGCTAGGTCTTTCCCATGATGCCCCACGGCGAACCCACCTCAGCAATCCTGC<br>CAAAACCCGGGCAGTCATGTTAGCCAAACAGCTGAATGAGCTCAGGTAGGAGGTGTACTGCCTGCAGCTGGAGGCTTGA<br>CCTTCGTGATCCCAGAACCCTGGACTGCAGT <b>GGAATG</b> GAGACACCCTGTAGCCTGCAGGGAGAGGAGTCAGGAAGGTTCT<br>ATGCCAGTCCCACCCTCCCACACACCAGCTCCCCTACCATGCTGGGAGG <b>CATTCC</b> TTACCGAGGATGCCAACACAGTGCT<br>CCTTCATGATGATTTCACTGTGAAATAAAGGTTGGGATGAAAGGAAATCATCCTGCCACCGGTAACCGGGATGGCTGAGTT<br>CCTCCACCTGCCGGATCAAGGAGAAAGAGGATGGATT <b>CAATG</b> GGACCATCTCAACTAGCTGGGCTGAGGTGGCCTACTAG<br>CTGTAGTGAACCATGAGTTTCCCTTTCCAGCTCTCCCAGCTGAGACACCCTGGTCCCAGGGGGACCTCAAAGTACTC<br>AGACACTGGACTCCTCCCACAGACCCAGGCTCCCCAGCCTGACCTGCAAATCCATCACGTAGCAAAGCAGGACTTCCGCA<br>TGCTTTCCGACCCACGCCGACATCTCGGGTGTGCCAAACAATCTACCTCTGCGCAAGAACTCTCCAGAGGATTGGGTGGG<br>CAAGCCTCGTGACGCCTTGAATTTGCAAGAACACAG <b>ACAATG</b> TGGAACAGGGCCATCTCCAGACATTTGGCCAGTCA<br>CCCTT <b>CATTG</b> TTGGCCCTCTATCTCTGCTGCGGAGGAGGCA |
| 50 | <b>TSPY1</b>                                          | AAATGATCATAAAAACTGGCAGGAGTAGACGAATAGAAATGCATCTTAAAACTTGCTAAACCCTTCAAGTCTCCATAAGAATT<br>GTAATGGAAAATGGATCGGTCGGCAGCTTTTTCCATACAATTATGAACAAATTATTTCTTCATACATAGATTTGTTTTTCAAT<br>ATTCTAAGGAATTAACCTTTATATTAATAGTAGGTGATGTAAGAAAGCAGGCCTTTATCAAGATAACTGACACTGGATGTCCATA<br>CCATTACTCAGGTGGGCCTTAATCCCAGCCGGTTCCTCCCTGGACACACACTGAAGGTCCCCAGCCATTTGGCAATCT<br>CTTCA <b>CATTCC</b> CAGCCCTGGAGGTAGCCCTAAAATACATGTACCTGAAGAAAATAAAACATTGCCTCACACTGGAGCCCAGT<br>GTGGTCTCCAGATTCCGTGTGAGGTGGACTAACTTATATGGGAAGGCAGGGCAGCGGGAGTGAGGATGGCAGAGAGGAT<br>TACACATGTCAAGGCAGCCGGGTGTCATGAAACAAAACATGACTGGCCTGGGAGAAACACTGTGAAAGGACACAGACCTA<br>GGTGGGCCTCAGGTGGACATCCTCGTGGAGAAAAAGGGGGCCCTGGTTGATCTCAAAAT                                                                                                                                                                                                                                                                                                                                                                                                                                                    |
| 51 | <b>TSPY1</b>                                          | CAGCCCTAGGCTGCTCGCCTGGCCTCCTCTCTGTTCCGCCTCTAGGGCTGACCCTCTCTCCATGGGATAGAAGTGAATG<br>GATTGAGCCATAGGCCCTGGCTGATGATCTAGGGACTGCAGAAGTGGGTCCAGGACAGTTCAGGTGACAGTT <b>CAAAGCC</b><br>AATCCCCAGAGACCAAG <b>GGAATG</b> ACCAGCTAGGTCTTTCCCATGATGCCCCACGGCGAACCCACCTCAGCAATCCTGC<br>CAAAACCCGGGCAGTCATGTTAGCCAAACAGCTGAATGAGCTCAGGTAGGAGGTGTACTGCCTGCAGCTGGAGGCTTGA<br>CCTTCGTGATCCCAGAACCCTGGACTGCAGT <b>GGAATG</b> GAGACACCCTGTAGCCTGCAGGGAGAGGAGTCAGGAAGGTTCT<br>ATGCCAGTCCCACCCTCCCACACACCAGCTCCCCTACCATGCTGGGAGG <b>CATTCC</b> TTACCGAGGATGCCAACACAGTGCT                                                                                                                                                                                                                                                                                                                                                                                                                                                                                                                                                                                            |

|    |                  |                                                                                                                                                                                                                                                                                                                                                                                                                                                                                                                                                                                                                                                                                                                                                                                                                                                                                                                                                                                                            |
|----|------------------|------------------------------------------------------------------------------------------------------------------------------------------------------------------------------------------------------------------------------------------------------------------------------------------------------------------------------------------------------------------------------------------------------------------------------------------------------------------------------------------------------------------------------------------------------------------------------------------------------------------------------------------------------------------------------------------------------------------------------------------------------------------------------------------------------------------------------------------------------------------------------------------------------------------------------------------------------------------------------------------------------------|
|    |                  | <p>CCTTCATGATGATTTCACTGTGGAAATAAAGGTTGGGATGAAAGGAAATCATCCTGCCACCGGTAACCGGGATGGCTGAGTT<br/> CCTCCACCTGCCGGATCAAGGAGAAAAGAGGATGGATTCAATGGGACCATCTCACTAGCCGGGCTGAGGTGGCCTACTAG<br/> CTGTAGTGAACCATGAGTTTCCCTTCCCAGCTCTCCACTGAGACAACCCTGGTCCCCAGGGGGACCTCAAAGTACTC<br/> AGACTGGACTCCTCCACAGACCCAGGCTCCCCAGCCTGACCTGCAAATCCATCACGTAGCAAAGCAGGACTTCCGCA<br/> TGCTTTCCGACCCACGCCGACATCTCGTGTGCCAAACAATCTACCTCTGCGCAAGAACTCTCCAGAGGATTGGGTGGCA<br/> AGCCTCGTGACGCCTTGAATTTGCAAGAACAACAGACAATGTGAACAGGGCCATCTCCAGACATTTGGCCAGTCACC<br/> CTTCATTGTTGGCCCTCTATCTCTGTCTGGCGAGGAGGCAACGCCACAACCTGTGGTGGTTTTTGGAGTGGGTGGACCCCG<br/> GCCAAGACGGCCTGGGCTGACC</p>                                                                                                                                                                                                                                                                                                                                                           |
| 52 | <b>TSPY1</b>     | <p>TAGACGAATAGAAATGCATCTTAAACTTGCCGAACACTTCAAGTCTCCATAAGAATTGTAATGAAAATGGATCAGTCGGC<br/> AGTTTTTCCATACAATTATGAACAAATTATATTTCTTCATACATAGATTTGTTTTTCAATATTCTAAGGAATTAACCTTTATATTA<br/> TAGTAGGTGATGTAAGAAAGCAGGCCTTTATCAAGATAACTGACTGGATGTCCATACCATTACTCAGGTGGCCTTAATTC<br/> CCAGCCAGGTTCCCTCCCTGGACACACTGAAGGTCCCCAGCCATTTGGCAATCTCTTCACTCCAGCCCTGGAGGT<br/> AGCCCTAAAATACATGTACCTGAAGAAAATAAACATTGCCTCACACTGGAGCCCAGTGTGGTCTCCAGATTCCGTGTGAG<br/> GTGGACTAACTTATATGGGAAGGCAGGGCAGCGGGAGTGAGGATGGCAGAGAGGATTACACATGTCAAGGCAGCCGGGG<br/> TCATGAAAACAAAACATGACTGGCCTGGGAGAAACACTGTGAAAGGACATACACCTAGGTGGCCTCAGGTGGACATCCT<br/> CGTGGAGAAAAAGGGGGCCCTGGTTGATCTCAAATG</p>                                                                                                                                                                                                                                                                                                                                       |
| 53 | <b>TSPY1</b>     | <p>CAGCCCTAGGCTGCTCGCCTGGCCTCCTCTCTGTTCCGCCTCTAGGGCTGACCCTCTCTCCATGGGATAGAAGTGAATG<br/> GATTGAGCCATAGGCCCTGGCTGATGATCTAGGGACTGCAGAAGTGGGTCCAGGACAGTTTCAAGGTGACAGTTCAAAGCC<br/> AATCCCCAGAGACCAAGGAATGACCAGCTAGGTCCTTTCCCATGATGCCCCACGGCGAACCCACCTCAGCAATCCTGC<br/> CAAACCCGGGCAGTCATGTTCCAGCCAAACAGCTGAATGAGCTCAGGTAGGAGGTGTACTGCCTGCAGCTGGAGGCTTGA<br/> CCTTCGTGATCCAGAACCCTGGACTGCAGTGGAAATGAGACACCCTGTAGCCTGCAGGGAGAGGAGTCAGGAAGGTTC<br/> ATGCCAGTCCCACCCTCCACACACCAGCTCCCCTACCATGCTGGGAGGCATTCCCTTACCAGGATGCCAACACAGTGCT<br/> CCTTCATGATGATTTCACTGTGGAAATAAAGGTTGGGATGAAAGGAAATCATCCTGCCACCGGTAACCGGGATGGCTGAGTT<br/> CCTCCACCTGCCGGATCAAGGAGAAAAGAGGATGGATTCAATGGGACCATCTCACTAGCCGGGCTGAGGTGGCCTACTAG<br/> CTGTAGTGAACCATGAGTTTCCCTTCCCAGCTCTCCACTGAGACAACCCTGGTCCCCAGGGGGACCTCAAAGTACTC<br/> AGACTGGACTCCTCCACAGACCCAGGCTCCCCAGCCTGACCTGCAAATCCATCACGTAGCAAAGCAGGACTTCCGCA<br/> TGCTTTCCGACCCACGCCGACATCTCGTGTGCCAAACAATCTACCTCTGCGCAAGAACTCTCCAGAGGATTGGGTGGCA<br/> AGCCTCGTGACGCCTTGAATTTCCGCA</p> |
| 54 | <b>LOC728137</b> | <p>AAATGATCATAAAAAGTGGCAGGAGTAGACGAATAGAAATGCATCTTAAACTTGCTAAACCCTTCAAGTCTCCATAAGAATT<br/> GTAATGAAAATGGATCGGTCCGCAGCTTTTCCATACAATTATGAACAAATTATATTTCTTCATACATAGATTTGTTTTTCAAT<br/> ATTCTAAGGAATTAACCTTTATATTAATAGTAGGTGATGTAAGAAAGCAGGCCTTTATCAAGATAACTGACTGGATGTCCATA<br/> CCATTAAGGATGAGGTCCTAATTTCCAGCCGGGTCCCTCCCTGGACACACTGAAGGTCCCCAGCCATTTGGCAATCT<br/> CTTCACTCCAGCCCTGGAGGTAGCCCTAAAATACATGTACCTGAAGAAAATAAACATTGCCTCACACTGGAGCCAGT<br/> GTGGTCTCCAGATTCCGTGTGAGGTGGACTAACTTATATGGGAAGGCAGGGCAGCGGGAGTGAGGATGGCAGAGAGGAT<br/> TACACATGTCAAGGCAGCCGGGTGATGAAAACAAAACATGACTGGCCTGGGAGAAACACTATGAAAGGACATACACCTAG<br/> GTGGCCTTAGGTGGACATCCTCGTGGAGAAAAGGGGGCCCTGGTTGATCTCAAATGAG</p>                                                                                                                                                                                                                                                                                                               |
| 55 | <b>LOC728137</b> | <p>CTCTGTTCCGCCTCTAGGGCTGACCCTCTCTCCATGGGATAGAAGTGAATGGATTGAGCCATAGGCCCTGGGTGATGATC<br/> TAGGTGACTGCAGAAGTGGGTCCAGGACAGTTCAGGTGACAGTTCAAAGCCAATTTCCAGAGACCAAGGAATGACCAGC<br/> TAGGTCTTTCCCATGATGCCCCACGGCGAACCCACCTCAGCAATCCTGCCAAAACCCGGGCAGTCATGTTCCAGCCAAA<br/> CAGCTGAATGAGCTCAGGTAGGAGGTGTACTGCCTGCAGCTGGAGGCTTACCTTCGTGATCCAGAACCCTGGACTGC<br/> AGTGGAAATGAGACACCCTGTAGCCTGCAGGAGAGGAGTCAGGAAGGTTTCATGCCAGTCCCACCCTCCACACACCAGC<br/> TCCCCTACCATGCTGGGAGGCATTCCCTTACCAGGATGCCAACACAGTGCTCCTTCATGATGATTTCACTGTGAAAATAAG</p>                                                                                                                                                                                                                                                                                                                                                                                                                                                                           |

|    |                                                       |                                                                                                                                                                                                                                                                                                                                                                                                                                                                                                                                                                                                                                                                                                                                                                                                                                                                                                                                                                                                                |
|----|-------------------------------------------------------|----------------------------------------------------------------------------------------------------------------------------------------------------------------------------------------------------------------------------------------------------------------------------------------------------------------------------------------------------------------------------------------------------------------------------------------------------------------------------------------------------------------------------------------------------------------------------------------------------------------------------------------------------------------------------------------------------------------------------------------------------------------------------------------------------------------------------------------------------------------------------------------------------------------------------------------------------------------------------------------------------------------|
|    |                                                       | GTTGGGATGAAAGGAAATCATCCTGCCACCGGTAACCGGGATGGCTGAGTTCCTCCACCTGCCGGATCAAGGAGAAAGAG<br>GATGGATTCAATGGGACCATCTCAACTAGCCGGGCTGAGGTGGCCTACTAGCTGTAGTGAACCATGAGTTTCCCCTTCCCA<br>GCTCTCCCACTGAGACAACCCTGGTCCCCAGGGGGACCTCAAAGTACTCAGACACTGGACTCCTCCACAGACCCAGG<br>CTCCCCAGCCTGACCTGCAAATCCATCACGTAGCAAAGCAGGACTTCCGCATGCTTTCCGACCCACGCCGACATCTCGTGT<br>GCCAAACAATCTACCTCTGCGCAAGAAGTCTCCAGAGGATTGGGTGGGCAAGCCTCGTGACGCCTTGAATTTGCA                                                                                                                                                                                                                                                                                                                                                                                                                                                                                                                                                                                     |
| 56 | <b>chrY:00995</b><br><b>2039-00995</b><br><b>2083</b> | CAGCCCTAGGCTGCTCGCCTGGCCTCCTCTCTGTTCCGCCTCTAGGGCTGACCCTCTCTCCATGGGATAGAAGTGAATG<br>GATTGAGCCATAGGCCCTGGCTGATGATCTAGGGGACTGCAGAAGTGGGTCCAGGACAGTTCAGGTGACAGTTCAAAGCC<br>AATCCCCAGAGACCAAAGGAATGACCAGCTAGGTCCTTTCCCATGATGCCCCATGGCGAACCCACCTCAGCAATCCTGCC<br>AAAACCCGGGCAGTCATGTTTCAGCCAAACAGCTGAATGAGCTCAGGTAGGAGGTGTACTGCCTGCAGCTGGAGGCTTGC<br>CTTCGTGATCCCAGAACCCTGGACTGCAGTGGAAATGAGACACCCTGTAGCCTGCAGGGAGAGGAGTCAGGAAGGTTTCA<br>GCCAGTCCCACCCTCCACACACCAGCTCCCCTACCATGCTGGGAGGCATTCCCTTACCAGGATGCCAACACAGTGCTCC<br>TTCATGATGATTTCACTGTGAAATAAAGGTTGGGATGAAAGGAAATCATCCTGCCACCGGTAACCGGGATGGCTGAGTTC<br>TCCACCTGCCGGATCAAGGAGAAAGAGGATGGATTCAATGGGACCATCTCAACTAGCTGGGCTGAGGTGGCCTACTAGCT<br>GTAGTGAACCATGAGTTTCCCCTTCCCAGCTCTCCCACTGAGACAACCCTGGTCCCCAGGGGGACCTCAAAGTACTCAG<br>ACACTGGACTCCTCCACAGACCCAGCTCCCCAGCCTGACCTGCAAATCCATCACGTAGCAAAGCAGGACTTCCGCATGC<br>TTTCCGACCCACGCCGACATCTCGTGTGCCAAACAATCTACCTCTGCGCAAGAAGTCTCCAGAGGATTGGGTGGCAAGCC<br>TCGTGACGCCTTGAATTTGCAAGAACACAGACAATGTGGAACAGGGCCATCTCC |
| 57 | <b>TSPY1</b>                                          | CAGCCCTAGGCTGCTCGCCTGGCCTCCTCTCTGTTCCGCCTCTAGGGCTGACCCTCTCTCCATGGGATAGAAGTGAATG<br>GATTGAGCCATAGGCCCTGGCTGATGATCTAGGGGACTGCAGAAGTGGGTCCAGGACAGTTCAGGTGACAGTTCAAAGCC<br>AATCCCCAGAGACCAAAGGAATGACCAGCTAGGTCCTTTCCCATGATGCCCCACGGCGAACCCACCTCAGCAATCCTGC<br>CAAACCCGGGCAGTCATGTTTCAGCCAAACAGCTGAATGAGCTCAGGTAGGAGGTGTACTGCCTGCAGCTGGAGGCTTGA<br>CCTTCGTGATCCCAGAACCCTGGACTGCAGTGGAAATGAGACACCCTGTAGCCTGCAGGGAGAGGAGTCAGGAAGGTTT<br>ATGCCAGTCCCACCCTCCACACACCAGCTCCCCTACCATGCTGGGAGGCATTCCCTTACCAGGATGCCAACACAGTGCT<br>CCTTCATGATGATTTCACTGTGAAATAAAGGTTGGGATGAAAGGAAATCATCCTGCCACCGGTAACCGGGATGGCTGAGTT<br>CCTCCACCTGCCGGATCAAGGAGAAAGAGGATGGATTCAATGGGACCATCTCAACTAGCCGGGCTGAGGTGGCCTACTAG<br>CTGTAGTGAACCATGAGTTTCCCCTTCCCAGCTCTCCCACTGAGACAACCCTGGTCCCCAGGGGGACCTCAAAGTACTC<br>AGACACTGGACTCCTCCACAGACCCAGGCTCCCCAGCCTGACCTGCAAATCCATCACGTAGCAAAGCAGGACTTCCGCA<br>TGCTTTCCGACCCACGCCGACATCTCGTGTGCCAAACAATCTACCTCTGCGCAAGAAGTCTCCAGAGGATTGGGTGGGCA<br>AGCCTCGTGACGCCTTGAATTTGCAAGAACACAGACAATGTG              |

Supplementary Table 3. Univariate Cox regression analysis for disease-specific and overall survival

| Variable                                       | Disease-specific survival |        | Overall survival         |        |
|------------------------------------------------|---------------------------|--------|--------------------------|--------|
|                                                | Hazard ratio<br>(95% CI)  | p      | Hazard ratio<br>(95% CI) | p      |
| <b>Nuclear EBP50</b><br>(positive vs negative) | 5.49<br>(2.59-11.66)      | <0.001 | 6.13<br>(3.49-10.76)     | <0.001 |
| <b>Age</b>                                     | 0.99<br>(0.97-1.02)       | 0.838  | 1.02<br>(0.99-1.04)      | 0.172  |
| <b>Sex</b><br>(female vs male)                 | 0.75<br>(0.37-1.52)       | 0.424  | 1.06<br>(0.62-1.80)      | 0.842  |
| <b>CEA</b>                                     | 1.004<br>(1.001-1.006)    | 0.007  | 1.003<br>(1.001-1.005)   | 0.011  |
| <b>Tumor stage</b>                             |                           |        |                          |        |
| II vs I                                        | 0.64<br>(0.16-2.55)       | 0.524  | 0.98<br>(0.38-2.53)      | 0.963  |
| III vs I                                       | 1.53<br>(0.47-4.96)       | 0.483  | 1.97<br>(0.83-4.64)      | 0.123  |
| IV vs I                                        | 7.69<br>(2.49-23.72)      | <0.001 | 4.84<br>(1.97-11.89)     | 0.001  |

Supplementary Table 4. Sequence information of the plasmids used in this study. Start codon and stop codon are highlighted in red. NLS tag is highlighted in yellow.

|                                                    |                                                                                                                                                                                                                                                                                                                                                                                                                                                                                                                                                                                                                                                                                                                                                                                                                                                                                                                                                                                                                                                                                                                                                                                                                                                                                                                                                                                                                                                                                                                                                                                                                                                                                                                                                                                                                                                                        |
|----------------------------------------------------|------------------------------------------------------------------------------------------------------------------------------------------------------------------------------------------------------------------------------------------------------------------------------------------------------------------------------------------------------------------------------------------------------------------------------------------------------------------------------------------------------------------------------------------------------------------------------------------------------------------------------------------------------------------------------------------------------------------------------------------------------------------------------------------------------------------------------------------------------------------------------------------------------------------------------------------------------------------------------------------------------------------------------------------------------------------------------------------------------------------------------------------------------------------------------------------------------------------------------------------------------------------------------------------------------------------------------------------------------------------------------------------------------------------------------------------------------------------------------------------------------------------------------------------------------------------------------------------------------------------------------------------------------------------------------------------------------------------------------------------------------------------------------------------------------------------------------------------------------------------------|
| <p><b>pcDNA3.1</b><br/><b>-FLAG-EBP50</b></p>      | <p>1 TAATACGACT CACTATAGGG AGACCCAAGC TGGCTAGCGA TTACGCCAAG CTCGAAATTA<br/> 61 ACCCTCACTA AAGGGAACAA AAGCTGGAGC TCCACCGCGG TGGCGGCCGC CACCA<b>ATGGAT</b><br/> 121 TACAAGGATG ACGACGATAA GGCCCGGGCG GATCCCCCGG GCTGCAGGAA TTCGATATCA<br/> 181 AGCTTGC GGG GCGAGATGAG CGCGGACGCG GCCGCGGGGG CGCCCTGCC CCGGCTCTGC<br/> 241 TGTCTGGAGA AGGGCCCGAA CGGCTACGGC TTCCACCTGC ACGGGGAGAA GGGCAAGGTG<br/> 301 GGCCAGTTCA TCCGGCTGGT GGAGCCTGGT TCTCCGGCCG AGAAGGCGGG GCTGCTGGCC<br/> 361 GGAGACCGGC TGGTGGAGGT GAACGGCGAG AACGTAGAGA AGGAGACCCA CCAGCAGGTG<br/> 421 GTGAGCCGCA TCCGCGCCGC GCTCAACGCC GTGCGCCTGC TGGTGGTCGA CCCCAGCGCG<br/> 481 GACGAGCGGC TGCAGAAGCT GGGCGTCCCG GTGCGGGAGG AGCTGCTGCG CGCCAGGAC<br/> 541 GGGCCCGGGC AGGCCGAGCC GCCGGCCGCC ACCGAGGCGC GGGGGGCTGG CGCCGAAAGT<br/> 601 GAGCCGCAGG CCGCCGCGCC GGAGCCGCGC GAAGCCGAGA GGAGCGGTCC GGAGCGGCGT<br/> 661 GAGCTCCGGC CTCGGCTCTG CGCCATGAAG AAAGGCGCCA ACGGCTACGG TTTCAACTTG<br/> 721 CACAGCGACA AGTCCAAGCC AGGCCAGTTC ATCCGGGCGG TGGACCCAGA CTCACCAGCT<br/> 781 GAGGCCTCGG GGCTCCGGGC TCAGGACCGC ATTGTGGAGG TGAATGGGGT CTGCGTGGAG<br/> 841 GGCAAGCAGC ATGGGGATGT GGTATCTGCC ATCAAGGCTG GTGGGGACGA GACCAAGCTG<br/> 901 CTGGTGGTAG ACAAGGAGAC TGATGAGTTC TTCAAGAAAT GCAAAGTGAT CCCGTCCAG<br/> 961 GAGCACCTGA CTGGTCCCTT GCCTGAGCCC TTTACCAATG GGGAGATCCG GAAGGAGAAC<br/> 1021 AGTCGTGAAC CTCTGGCCGA GGTAGCCTCT GAGAGCCCCA GATCAGCCCT GGCAAGATCC<br/> 1081 ACCTCCAGTG ATACCAGTGA GGAGCTGAAT TCCAAGACA GCCCAGGAA ACAGGACTCC<br/> 1141 ACGGCACCCT CGTCTACCTC CTCCTCTCT GACCCCATCT TGGACTTCAA CATCTCCCTG<br/> 1201 GCCATGGCCA GGGAGCGGGC CCACAGAAG CGCAGCAGCA AGCGGGCCCC GCAGATGGAC<br/> 1261 TGGAGCAAGA AAAATGAACT CTTAGCAAC CT<b>CTGAGCAT</b> CCTCCCACAG GCTCAGATCT<br/> 1321 GGATCCCCTC TAGAGTCGAC CTGAGGCAT GCAAGCTTAT CGATACGTC GACCTCGAGT<br/> 1381 CTAGAGGGCC CGTTTAAACC CGCTGATCAG CCTCGACTGT GCCTTCTA</p> |
| <p><b>pcDNA3.1</b><br/><b>-FLAG-EBP50-GAGA</b></p> | <p>1 TAATACGACT CACTATAGGG AGACCCAAGC TGGCTAGCGA TTACGCCAAG CTCGAAATTA<br/> 61 ACCCTCACTA AAGGGAACAA AAGCTGGAGC TCCACCGCGG TGGCGGCCGC CACCA<b>ATGGAT</b><br/> 121 TACAAGGATG ACGACGATAA GGCCCGGGCG GATCCCCCGG GCTGCAGGAA TTCGATGGCC<br/> 181 GCGGGGGCGC CCCTGCCCCG GCTCTGCTGT CTGGAGAAGG GCCCGAACGG CGCCGGCGCG<br/> 241 CACCTGCACG GGGAGAAGGG CAAGGTGGGC CAGTTCATCC GGCTGGTGGG GCCTGGTTCT<br/> 301 CCGGCCGAGA AGGCGGGGCT GCTGGCCGGA GACCGGCTGG TGGAGGTGAA CGGCGAGAAC<br/> 361 GTAGAGAAGG AGACCCACCA GCAGGTGGTG AGCCGCATCC GCGCCGCGCT CAACGCCGTG<br/> 421 CGCCTGCTGG TGGTCGACCC CGACGCGGAC GAGCGGCTGC AGAAGCTGGG CGTCCCGGTG<br/> 481 CGGGAGGAGC TGCTGCGCGC CCAGGACGGG CCCGGGCAGG CCGAGCCGCC GGCCGCCACC</p>                                                                                                                                                                                                                                                                                                                                                                                                                                                                                                                                                                                                                                                                                                                                                                                                                                                                                                                                                                                                                                                                                                                                                              |

|                                                   |                                                                                                                                                                                                                                                                                                                                                                                                                                                                                                                                                                                                                                                                                                                                                                                                                                                                                                                                                                                                                                                                                                                                                                                                                                                                                                                                                                                                                                                                                                                                                                                                                                      |
|---------------------------------------------------|--------------------------------------------------------------------------------------------------------------------------------------------------------------------------------------------------------------------------------------------------------------------------------------------------------------------------------------------------------------------------------------------------------------------------------------------------------------------------------------------------------------------------------------------------------------------------------------------------------------------------------------------------------------------------------------------------------------------------------------------------------------------------------------------------------------------------------------------------------------------------------------------------------------------------------------------------------------------------------------------------------------------------------------------------------------------------------------------------------------------------------------------------------------------------------------------------------------------------------------------------------------------------------------------------------------------------------------------------------------------------------------------------------------------------------------------------------------------------------------------------------------------------------------------------------------------------------------------------------------------------------------|
|                                                   | <p>541 GAGGCGCGGG GGGCTGGCGC CGAAAGTGAG CCGCAGGCCG CCGCGCCGGA GCCGCGCGAA<br/> 601 GCCGAGAGGA GCGGTCCGGA GCGGCGTGAG CTCCGGCCTC GGCTCTGCGC CATGAAGAAA<br/> 661 GGCGCCAACG GCGCCGGCGC GAACTTGAC AGCGACAAGT CCAAGCCAGG CCAGTTCATC<br/> 721 CGGGCGGTGG ACCCAGACTC ACCAGCTGAG GCCTCGGGGC TCCGGGCTCA GGACCGCATT<br/> 781 GTGGAGGTGA ATGGGGTCTG CGTGGAGGGC AAGCAGCATG GGGATGTGGT ATCTGCCATC<br/> 841 AAGGCTGGTG GGGACGAGAC CAAGCTGCTG GTGGTAGACA AGGAGACTGA TGAGTTCTTC<br/> 901 AAGAAATGCA AAGTGATCCC GTCCCAGGAG CACCTGACTG GTCCCTTGCC TGAGCCCTTT<br/> 961 ACCAATGGGG AGATCCGGAA GGAGAACAGT CGTGAACCTC TGGCCGAGGT AGCCTCTGAG<br/> 1021 AGCCCCAGAT CAGCCCTGGC AAGATCCACC TCCAGTGATA CCAGTGAGGA GCTGAATTCC<br/> 1081 CAAGACAGCC CCAGGAAACA GGA CTCCACG GCACCCTCGT CTACCTCCTC CTCCTCTGAC<br/> 1141 CCCATCTTGG ACTTCAACAT CTCCCTGGCC ATGGCCAGGG AGCGGGCCCA CCAGAAGCGC<br/> 1201 AGCAGCAAGC GGGCCCCGCA GATGGACTGG AGCAAGAAAA ATGAACTCTT CAGCAACCTC<br/> 1261 TGA GCATCCT CCCACAGGCT CAGATCTGGA TCCCCTCTAG AGTCGACCTG CAGGCATGCA<br/> 1321 AGTTATCGA TACCGTCGAC CTCGAGTCTA GAGGGCCCGT TAAACCCGC TGATCAGCCT<br/> 1381 CGACTGTGCC TTCTA</p>                                                                                                                                                                                                                                                                                                                                                                                                                                                                                                          |
| <p><b>pcDNA3.1</b><br/><b>-FLAG-EBP50-NLS</b></p> | <p>1 TAATACGACT CACTATAGGG AGACCCAAGC TGGCTAGCGA TTACGCCAAG CTCGAAATTA<br/> 61 ACCCTCACTA AAGGGAACAA AAGCTGGAGC TCCACCGCGG TGGCGGCCGC CACCATGGAT<br/> 121 TACAAGGATG ACGACGATAA GGCCCGGGCG GATCCCCCGG GCTGCAGGAA TTCGATATCA<br/> 181 AGTTGCGGG GCGAGATGAG CGCGGACGCG GCCGCGGGGG CGCCCTGCC CCGGCTCTGC<br/> 241 TGTCTGGAGA AGGGCCCGAA CGGCTACGGC TTCCACCTGC ACGGGGAGAA GGGCAAGGTG<br/> 301 GGCCAGTTCA TCCGGCTGGT GGAGCCTGGT TCTCCGGCCG AGAAGGCGGG GCTGCTGGCC<br/> 361 GGAGACCGGC TGGTGGAGGT GAACGGCGAG AACGTAGAGA AGGAGACCCA CCAGCAGGTG<br/> 421 GTGAGCCGCA TCCGCGCCGC GCTCAACGCC GTGCGCCTGC TGGTGGTCGA CCCCAGCGG<br/> 481 GACGAGCGGC TGCAGAAGCT GGGCGTCCCG GTGCGGGAGG AGCTGCTGCG CGCCAGGAC<br/> 541 GGGCCCGGGC AGGCCGAGCC GCCGGCCGCC ACCGAGGCGC GGGGGGCTGG CGCCGAAAGT<br/> 601 GAGCCGCAGG CCGCCGCGCC GGAGCCGCGC GAAGCCGAGA GGAGCGGTCC GGAGCGGCGT<br/> 661 GAGCTCCGGC CTCGGCTCTG CGCCATGAAG AAAGGCGCCA ACGGCTACGG TTTCAACTTG<br/> 721 CACAGCGACA AGTCCAAGCC AGGCCAGTTC ATCCGGGCGG TGGACCCAGA CTCACCAGCT<br/> 781 GAGGCCTCGG GGCTCCGGG TCAGGACCGC ATTGTGGAGG TGAATGGGGT CTGCGTGGAG<br/> 841 GGCAAGCAGC ATGGGGATGT GGTATCTGCC ATCAAGGCTG GTGGGGACGA GACCAAGCTG<br/> 901 CTGGTGGTAG ACAAGGAGAC TGATGAGTTC TTCAAGAAAT GCAAAGTGAT CCCGTCCCAG<br/> 961 GAGCACCTGA CTGGTCCCTT GCCTGAGCCC TTTACCAATG GGGAGATCCG GAAGGAGAAC<br/> 1021 AGTCGTGAAC CTCTGGCCGA GGTAGCCTCT GAGAGCCCCA GATCAGCCCT GGCAAGATCC<br/> 1081 ACCTCCAGTG ATACCAGTGA GGAGCTGAAT TCCCAAGACA GCCCCAGGAA ACAGGACTCC<br/> 1141 ACGGCACCCT CGTCTACCTC CTCCTCCTCT GACCCCATCT TGGACTTCAA CATCTCCCTG<br/> 1201 GCCATGGCCA GGGAGCGGGC CCACCAGAAG CGCAGCAGCA AGCGGGCCCC GCAGATGGAC</p> |

|                                                   |                                                                                                                                                                                                                                                                                                                                                                                                                                                                                                                                                                                                                                                                                                                                                                                                                                                                                                                                                                                                                                                                                                                                                                                                                                                                                                                                                     |
|---------------------------------------------------|-----------------------------------------------------------------------------------------------------------------------------------------------------------------------------------------------------------------------------------------------------------------------------------------------------------------------------------------------------------------------------------------------------------------------------------------------------------------------------------------------------------------------------------------------------------------------------------------------------------------------------------------------------------------------------------------------------------------------------------------------------------------------------------------------------------------------------------------------------------------------------------------------------------------------------------------------------------------------------------------------------------------------------------------------------------------------------------------------------------------------------------------------------------------------------------------------------------------------------------------------------------------------------------------------------------------------------------------------------|
|                                                   | <p>1261 TGGAGCAAGA AAAATGAACT CTTAGCAAC CTCTCTCGAG CTGATCCAAA AAAGAAGAGA<br/> 1321 AAGGTAGATC CAAAAAAGAA GAGAAAGGTA GATCCAAAAA AGAAGAGAAA GGTAAGGATCC<br/> 1381 CCTCTAGAGT CGACCTGCAG GCATGCAAGC TTATCGATAC CGTCGACCTC GAGTCTAGAG<br/> 1441 GGCCCGTTTA AACCCGCTGA TCAGCCTCGA CTGTGCCTTC TAGTTGCCAG CCATCTGTTG<br/> 1501 TTTGCCCTC CCCCCTGCCT TCCTTGA</p>                                                                                                                                                                                                                                                                                                                                                                                                                                                                                                                                                                                                                                                                                                                                                                                                                                                                                                                                                                                            |
| <p><b>pcDNA3.1</b><br/> <b>-FLAG-dnTcf1</b></p>   | <p>1 TAATACGACT CACTATAGGG AGACCCAAGC TGGCTAGCGA TTACGCCAAG CTCGAAATTA<br/> 61 ACCCTCACTA AAGGGAACAA AAGCTGGAGC TCCACCGCGG TGGCGGCCGC CACCATGGAT<br/> 121 TACAAGGATG ACGACGATAA GGCCCGGGCG GATCCCCCGG GCTGCAGGAA TTCCAAGCTT<br/> 181 TCCGGATCCA TGTACAAAGA GACCGTCTAC TCCGCCTTCA ATCTGCTCAT GCATTACCCA<br/> 241 CCCCCCTCGG GAGCAGGGCA GCACCCCAAG CCGCAGCCCC CGCTGCACAA GGCCAATCAG<br/> 301 CCCCCCACG GTGTCCCCA ACTCTCTCTC TACGAACATT TCAACAGCCC ACATCCCACC<br/> 361 CCTGCACCTG CGGACATCAG CCAGAAGCAA GTTACAGGC CTCTGCAGAC CCCTGACCTC<br/> 421 TCTGGTTCT ACTCCCTGAC CTCAGGCAGC ATGGGGCAGC TCCCCACAC TGTGAGCTGG<br/> 481 TTCACCCACC CATCCTTGAT GCTAGTTCT GGTGTACCTG GTCACCCAGC AGCCATCCCC<br/> 541 CACCCGGCCA TTGTGCCCC CTCAGGGAAG CAGGAGCTGC AGCCCTTCGA CCGCAACCTG<br/> 601 AAGACACAAG CAGAGTCCAA GGCAGAGAAG GAGGCCAAGA AGCCAACCAT CAAGAAGCCC<br/> 661 CTCATGCCT TCATGCTGTA CATGAAGGAG ATGAGAGCCA AGGTCATTGC AGAGTGCACA<br/> 721 CTTAAGGAGA GCGCTGCCAT CAACCAGATC CTGGGCCGCA GGTGGCACGC GCTGTCGCGA<br/> 781 GAAGAGCAGG CCAAGTACTA TGAGCTGGCC CGCAAGGAGA GGCAGCTGCA CATGCAGCTA<br/> 841 TACCCAGGCT GGTCAGCGCG GGACAACACTAC GGAAGAAGA AGAGGCGGTC GAGGGAAAAG<br/> 901 CACCAAGAAT CCACCACAGG AGGAAAAAGA AATGCATTCG GACTTACCC GGAGAAGGCC<br/> 961 GCTGCCCCAG CCCCCTTCT TCCGATGACA GTGCTTAGA GGGCCCGTTT AAACCCGCTG<br/> 1021 ATCAGCCTCG ACTGTGCCTT CTA</p> |
| <p><b>pcDNA3.1</b><br/> <b>-FLAG-dnTcf1dc</b></p> | <p>1 TAATACGACT CACTATAGGG AGACCCAAGC TGGCTAGCGA TTACGCCAAG CTCGAAATTA<br/> 61 ACCCTCACTA AAGGGAACAA AAGCTGGAGC TCCACCGCGG TGGCGGCCGC CACCATGGAT<br/> 121 TACAAGGATG ACGACGATAA GGCCCGGGCG GATCCCCCGG GCTGCAGGAA TTCCAAGCTT<br/> 181 TCCGGATCCA TGTACAAAGA GACCGTCTAC TCCGCCTTCA ATCTGCTCAT GCATTACCCA<br/> 241 CCCCCCTCGG GAGCAGGGCA GCACCCCAAG CCGCAGCCCC CGCTGCACAA GGCCAATCAG<br/> 301 CCCCCCACG GTGTCCCCA ACTCTCTCTC TACGAACATT TCAACAGCCC ACATCCCACC<br/> 361 CCTGCACCTG CGGACATCAG CCAGAAGCAA GTTACAGGC CTCTGCAGAC CCCTGACCTC<br/> 421 TCTGGTTCT ACTCCCTGAC CTCAGGCAGC ATGGGGCAGC TCCCCACAC TGTGAGCTGG<br/> 481 TTCACCCACC CATCCTTGAT GCTAGTTCT GGTGTACCTG GTCACCCAGC AGCCATCCCC<br/> 541 CACCCGGCCA TTGTGCCCC CTCAGGGAAG CAGGAGCTGC AGCCCTTCGA CCGCAACCTG<br/> 601 AAGACACAAG CAGAGTCCAA GGCAGAGAAG GAGGCCAAGA AGCCAACCAT CAAGAAGCCC<br/> 661 CTCATGCCT TCATGCTGTA CATGAAGGAG ATGAGAGCCA AGGTCATTGC AGAGTGCACA<br/> 721 CTTAAGGAGA GCGCTGCCAT CAACCAGATC CTGGGCCGCA GGTGGCACGC GCTGTCGCGA</p>                                                                                                                                                                                                                                                                                                                                               |

|                                                 |                                                                                                                                                                                                                                                                                                                                                                                                                                                                                                                                                                                                                                                                                                                                                                                                                                                                                                                                                                                                                                                                                                                                                                                                                                                                                                                                                                                                                                                                                                                                                                                                                                                                                                                                                                                                                            |
|-------------------------------------------------|----------------------------------------------------------------------------------------------------------------------------------------------------------------------------------------------------------------------------------------------------------------------------------------------------------------------------------------------------------------------------------------------------------------------------------------------------------------------------------------------------------------------------------------------------------------------------------------------------------------------------------------------------------------------------------------------------------------------------------------------------------------------------------------------------------------------------------------------------------------------------------------------------------------------------------------------------------------------------------------------------------------------------------------------------------------------------------------------------------------------------------------------------------------------------------------------------------------------------------------------------------------------------------------------------------------------------------------------------------------------------------------------------------------------------------------------------------------------------------------------------------------------------------------------------------------------------------------------------------------------------------------------------------------------------------------------------------------------------------------------------------------------------------------------------------------------------|
|                                                 | <p>781 GAAGAGCAGG CCAAGTACTA TGAGCTGGCC CGCAAGGAGA GGCAGCTGCA CATGCAGCTA<br/> 841 TACCCAGGCT GGTCAGCGCG GGACAACACTAC GGGAAGAAGA AGAGGCGGTC GAGGGAAAAG<br/> 901 CACCAAGAAT CCACCACAGG AGGAAAAAGA AATGCATTCG GTACTTACCC GGAGAAGGCC<br/> 961 GCTGCCCCAG CCCC GTTCTTCC TCCGTAGAAAG CTTAGATCTG GATCCCCTCT AGAGGGCCCC<br/> 1021 TTTAAACCCG CTGATCAGCC TCGACTGTGC CTTCTA</p>                                                                                                                                                                                                                                                                                                                                                                                                                                                                                                                                                                                                                                                                                                                                                                                                                                                                                                                                                                                                                                                                                                                                                                                                                                                                                                                                                                                                                                                      |
| <p><b>pcDNA3.1</b><br/><b>-Myc-FLTcf1</b></p>   | <p>1 TAATACGACT CACTATAGGG AGACCCAAGC TGGCTAGCGT TTAAACTTAA GCTTGGTACC<br/> 61 GAGCTCGGAT CCACTAGTCC AGTGTGGTGG AATTCTGCAG ATATCCAGCA CAGTGGCGGC<br/> 121 CGCCATGAG CAGAACTCA TCTCTGAAGA GGATCTGGCC CGGGCGGATC CCCC GGGCTG<br/> 181 CAGGAATTCG ATATCAAGCT TCACGTGCAC CATGCCGAG CTGGACTCCG GCGGGGGCGG<br/> 241 CGCGGGCGGC GCGACGACC TCGGCGCGCC GGACGAGCTG CTGGCCTTCC AGGATGAAGG<br/> 301 CGAGGAGCAG GACGACAAGA GCCGCGACAG CGCCGCCGGT CCCGAGCGCG ACCTGGCCGA<br/> 361 GCTCAAGTCG TCGCTCGTGA ACGAGTCCGA GGGCGCGGCC GCGGCGCAG GGATCCC GGG<br/> 421 GGTCCC GGGGCCGCGG GGGCCCGCGG CGAGGCCGAG GCTCTCGGGC GGAACACGC<br/> 481 TGCAGAGAGA CTCTTCCCGG ACAAATTCC AGAGCCCCTG GAGGACGGCC TGAAGGCCCC<br/> 541 GGAGTGCACC AGCGGCATGT ACAAAGAGAC CGTCTACTCC GCCTTCAATC TGCTCATGCA<br/> 601 TTACCCACCC CCCTCGGGAG CAGGGCAGCA CCCCAGCCG CAGCCCCCGC TGCACAAGGC<br/> 661 CAATCAGCCC CCCCACGGTG TCCCCAACT CTCTCTCTAC GAACATTTCA ACAGCCCACA<br/> 721 TCCCACCCCT GCACCTGCGG ACATCAGCCA GAAGCAAGTT CACAGGCCTC TGCAGACCCC<br/> 781 TGACCTCTCT GGCTTCTACT CCCTGACCTC AGGCAGCATG GGCAGCTCC CCCACTGT<br/> 841 GAGCTGGTTC ACCCACCCAT CTTGATGCT AGGTTCTGGT GTACCTGGTC ACCCAGCAGC<br/> 901 CATCCCCAC CCGGCCATTG TGCCCCCTC AGGGAAGCAG GAGCTGCAGC CCTTCGACCG<br/> 961 CAACCTGAAG ACACAAGCAG AGTCCAAGGC AGAGAAGGAG GCCAAGAAGC CAACCATCAA<br/> 1021 GAAGCCCCTC AATGCCTTCA TGCTGTACAT GAAGGAGATG AGAGCCAAGG TCATTGCAGA<br/> 1081 GTGCACACTT AAGGAGAGCG CTGCCATCAA CCAGATCCTG GGCCGAGGT GGCACGCGCT<br/> 1141 GTCGCGAGAA GAGCAGGCCA AGTACTATGA GCTGGCCCGC AAGGAGAGGC AGCTGCACAT<br/> 1201 GCAGCTATAC CCAGGCTGGT CAGCGCGGGA CAACTACGGG AAGAAGAAGA GGCAGTGCAG<br/> 1261 GAAAAAGCAC CAAGAATCCA CCACAGGAGG AAAAAGAAAT GCATTTCGTA CTTACCCGGA<br/> 1321 GAAGGCCGCT GCCCAGCCC CGTTCCTTCC GATGACAGTG CTC TAGAGGG CCCGTTTAAA<br/> 1381 CCCGCTGATC AGCCTCGACT GTGCCTTCTA</p> |
| <p><b>pcDNA3.1</b><br/><b>-Myc-FLTcf1dc</b></p> | <p>1 TAATACGACT CACTATAGGG AGACCCAAGC TGGCTAGCGT TTAAACTTAA GCTTGGTACC<br/> 61 GAGCTCGGAT CCACTAGTCC AGTGTGGTGG AATTCTGCAG ATATCCAGCA CAGTGGCGGC<br/> 121 CGCCATGAG CAGAACTCA TCTCTGAAGA GGATCTGGCC CGGGCGGATC CCCC GGGCTG<br/> 181 CAGGAATTCG ATATCAAGCT TCACGTGCAC CATGCCGAG CTGGACTCCG GCGGGGGCGG<br/> 241 CGCGGGCGGC GCGACGACC TCGGCGCGCC GGACGAGCTG CTGGCCTTCC AGGATGAAGG<br/> 301 CGAGGAGCAG GACGACAAGA GCCGCGACAG CGCCGCCGGT CCCGAGCGCG ACCTGGCCGA<br/> 361 GCTCAAGTCG TCGCTCGTGA ACGAGTCCGA GGGCGCGGCC GCGGCGCAG GGATCCC GGG</p>                                                                                                                                                                                                                                                                                                                                                                                                                                                                                                                                                                                                                                                                                                                                                                                                                                                                                                                                                                                                                                                                                                                                                                                                                                                                                   |



|                                                    |                                                                                                                                                                                                                                                                                                                                                                                                                                                                                                                                                                                                                                                                                                                                                                                                                                                                                                                                                                                                                                                                                                                                                                                                                                                                                                                                                                                                                                                                                              |
|----------------------------------------------------|----------------------------------------------------------------------------------------------------------------------------------------------------------------------------------------------------------------------------------------------------------------------------------------------------------------------------------------------------------------------------------------------------------------------------------------------------------------------------------------------------------------------------------------------------------------------------------------------------------------------------------------------------------------------------------------------------------------------------------------------------------------------------------------------------------------------------------------------------------------------------------------------------------------------------------------------------------------------------------------------------------------------------------------------------------------------------------------------------------------------------------------------------------------------------------------------------------------------------------------------------------------------------------------------------------------------------------------------------------------------------------------------------------------------------------------------------------------------------------------------|
|                                                    | <p>421 GGTCCCAGGG GCCGGCGCCG GGGCCCAGCG CGAGGCCGAG GCTCTCGGGC GGAACACGC<br/> 481 TGCAGCAGAGA CTCTTCCCAG ACAAATTCC AGAGCCCCTG GAGGACGGCC TGAAGGCCCC<br/> 541 GGAGTGCACC AGCGGCATGT ACAAAGAGAC CGTCTACTCC GCCTTCAATC TGCTCATGCA<br/> 601 TTACCCACCC CCCTCGGGAG CAGGGCAGCA CCCCAGCCG CAGCCCCCGC TGCACAAGGC<br/> 661 CAATCAGCCC CCCACGGTG TCCCCAACT CTCTCTCTAC GAACATTTCA ACAGCCCACA<br/> 721 TCCCACCCT GCACCTGCGG ACATCAGCCA GAAGCAAGTT CACAGGCCCTC TGCAGACCCC<br/> 781 TGACCTCTCT GGCTTCTACT CCCTGACCTC AGGCAGCATG GGGCAGCTCC CCCACACTGT<br/> 841 GAGCTGGTTC ACCCACCCAT CTTGATGCT AGGTTCTGGT GTACCTGGTC ACCCAGCAGC<br/> 901 CATCCCCAC CCGGCCATTG TGCCCCCTC AGGAAGCAG GAGCTGCAGC CTTTCGACCG<br/> 961 CAACCTGAAG ACACAAGCAG AGTCCAAGGC AGAGAAGGAG GCCAAGAAGC CAACCATCAA<br/> 1021 GAAGCCCCTC AATGCCTTCA TGCTGTACAT GAAGGAGATG AGAGCCAAGG TCATTGCAGA<br/> 1081 GTGCACACTT AAGGAGAGCG CTGCCATCAA CCAGATCCTG GGCCGCAGGT GGCACGCGCT<br/> 1141 GTCGCGAGAA GAGCAGGCCA AGTACTATGA GCTGGCCCCG AAGGAGAGGC AGCTGCACAT<br/> 1201 GCAGCTATAC CCAGGCTGGT CAGCGCGGGA CACTACGGG AAGAAGAAGA GGCGGTGCGAG<br/> 1261 GGAAAAGCAC CAAGAATCCA CCACAGGAGG AAAAAGAAAT GCATTCGGTA CTTACCCGGA<br/> 1321 GAAGGCCGCT GCCCCAGCCC CGTTCCTTCC <b>G</b>TAGAAGCTT AGATCTGGAT CCCCTCTAGA<br/> 1381 GGGCCCCTTT AAACCCGCTG ATCAGCCTCG ACTGTGCCTT CTA</p>                                                                                                                                                                             |
| <p><b>pET32</b><br/><br/><b>-Trx-His-EBP50</b></p> | <p>1 TAATACGACT CACTATAGGG GAATTGTGAG CGGATAACAA TTCCCCTCTA GAAATAATTT<br/> 61 TGTTTAACTT TAAGAAGGAG ATATACAT<b>A</b>T <b>G</b>AGCGATAAA ATTATTCACC TGACTGACGA<br/> 121 CAGTTTTGAC ACGGATGTAC TCAAAGCGGA CGGGGCGATC CTCGTGATT TCTGGGCAGA<br/> 181 GTGGTGCAGT CCGTGCAAAA TGATCGCCCC GATTCTGGAT GAAATCGCTG ACGAATATCA<br/> 241 GGGCAAATG ACCGTTGCAA AACTGAACAT CGATCAAAC CCTGGCACTG CGCCGAAATA<br/> 301 TGGCATCCGT GGTATCCCGA CTCTGCTGCT GTTCAAAAAC GGTGAAGTGG CGGCAACCAA<br/> 361 AGTGGGTGCA CTGTCTAAAG GTCAGTTGAA AGAGTTCCTC GACGCTAACC TGGCCGGTTC<br/> 421 TGGTTCTGGC CATATGCACC ATCATCATCA TCATTCTTCT GGTCTGGTGC CACGCGGTTC<br/> 481 TGGTATGAAA GAAACCGCTG CTGCTAAATT CGAACGCCAG CACATGGACA GCCCAGATCT<br/> 541 GGGTACCGAC GACGACGACA AGGCCATGGC TGATATCGGA TCCATGAGCG CGGACGCAGC<br/> 601 GGCCGGGGCG CCCCTGCCCC GGCTCTGCTG CCTGGAGAAG GGTCCGAACG GCTACGGCTT<br/> 661 CCACCTGCAC GGGGAGAAGG GCAAGTTGGG CCAGTACATC CGGCTGGTGG AGCCCGGCTC<br/> 721 GCCGGCCGAG AAGGCGGGGC TGCTGGCGGG GGACCGGCTG GTGGAGGTGA ACGGCGAAAA<br/> 781 CGTGGAGAAG GAGACCCACC AGCAGGTGGT GAGCCGCATC CGCGCCGCAC TCAACGCCGT<br/> 841 GCGCCTGCTG GTGGTCGACC CCGAGACGGA CGAGCAGCTG CAGAAGCTCG GCGTCCAGGT<br/> 901 CCGAGAGGAG CTGCTGCGCG CCCAGGAAGC GCCGGGGCAG GCCGAGCCGC CGGCCGCCGC<br/> 961 CGAGGTGCAG GGGGCTGGCA ACGAAAATGA GCCTCGCGAG GCCGACAAGA GCCACCCGGA<br/> 1021 GCAGCGCGAG CTTCCGCCTC GGCTCTGTAC CATGAAGAAG GGCCCCAGTG GCTATGGCTT<br/> 1081 CAACCTGCAC AGCGACAAGT CCAAGCCAGG CCAGTTCATC CGGTCAAGTG ACCCAGACTC</p> |

|                                                    |                                                                                                                                                                                                                                                                                                                                                                                                                                                                                                                                                                                                                                                                                                                                                                                                                                                                                                                                                                                                                                                                                                                                                                                                                                                                                                                                                                                         |
|----------------------------------------------------|-----------------------------------------------------------------------------------------------------------------------------------------------------------------------------------------------------------------------------------------------------------------------------------------------------------------------------------------------------------------------------------------------------------------------------------------------------------------------------------------------------------------------------------------------------------------------------------------------------------------------------------------------------------------------------------------------------------------------------------------------------------------------------------------------------------------------------------------------------------------------------------------------------------------------------------------------------------------------------------------------------------------------------------------------------------------------------------------------------------------------------------------------------------------------------------------------------------------------------------------------------------------------------------------------------------------------------------------------------------------------------------------|
|                                                    | <p>1141 CCCGGCTGAG GCTTCAGGGC TCCGGGCCCA GGATCGCATT GTGGAGGTGA ACGGGGTCTG<br/> 1201 CATGGAGGGG AAGCAGCATG GGGACGTGGT GTCCGCCATC AGGGCTGGCG GGGACGAGAC<br/> 1261 CAAGCTGCTG GTGGTGGACA GGGAAACTGA CGAGTTCTTC AAGAAATGCA GAGTGATCCC<br/> 1321 ATCTCAGGAG CACCTGAATG GTCCCCTGCC TGTGCCCTTC ACCAATGGGG AGATACAGAA<br/> 1381 GGAGAACAGT CGTGAAGCCC TGGCAGAGGC AGCCTTGGAG AGCCCCAGGC CAGCCCTGGT<br/> 1441 GAGATCCGCC TCCAGTGACA CCAGCGAGGA GCTGAATTCC CAAGACAGCC CCCCAAAACA<br/> 1501 GGA CTCCACA GCGCCCTCGT CTACCTCCTC CTCCGACCCC ATCCTAGACT TCAACATCTC<br/> 1561 CCTGGCCATG GCCAAAGAGA GGGCCCACCA GAAACGCAGC AGCAAACGGG CCCC GCAGAT<br/> 1621 GGA CTGGAGC AAGAAAAACG AACTCTTCAG CAACCTTGA AAGCTTGCGG CCGCACTCGA<br/> 1681 GCACCACCAC CACCACCAC</p>                                                                                                                                                                                                                                                                                                                                                                                                                                                                                                                                                                                                                                          |
| <p><b>pET32</b><br/><br/> <b>-Trx-His-PDZ1</b></p> | <p>1 TAATACGACT CACTATAGGG GAATTGTGAG CGGATAACAA TTCCCCTCTA GAAATAATTT<br/> 61 TGTTTAACTT TAAGAAGGAG ATATACATAT GAGCGATAAA ATTATTCACC TGA CTGACGA<br/> 121 CAGTTTTGAC ACGGATGTAC TCAAAGCGGA CGGGGCGATC CTCGTCGATT TCTGGGCAGA<br/> 181 GTGGTGCGGT CCGTGCAAAA TGATCGCCCC GATTCTGGAT GAAATCGCTG ACGAATATCA<br/> 241 GGGCAA ACTG ACCGTTGCAA AACTGAACAT CGATCAA AAC CCTGGCACTG CGCCGAAATA<br/> 301 TGGCATCCGT GGTATCCCGA CTCTGCTGCT GTTCAAAAAC GGTGAAGTGG CGGCAACCAA<br/> 361 AGTGGGTGCA CTGTCTAAAG GTCAGTTGAA AGAGTTCCTC GACGCTAACC TGGCCGGTTC<br/> 421 TGGTTCTGGC CATATGCACC ATCATCATCA TCATTCTTCT GGTCTGGTGC CACGCGGTTC<br/> 481 TGGTATGAAA GAAACCGCTG CTGCTAAATT CGAACGCCAG CACATGGACA GCCCAGATCT<br/> 541 GGGTACCGAC GACGACGACA AGGCCATGGC TGATATCGGA TCCATGAGCG CGGACGCAGC<br/> 601 GGCCGGGGCG CCCCTGCCCC GGCTCTGCTG CCTGGAGAAG GGTCCGAACG GCTACGGCTT<br/> 661 CCACCTGCAC GGGGAGAAGG GCAAGTTGGG CCAGTACATC CGGCTGGTGG AGCCCCGGCTC<br/> 721 GCCGGCCGAG AAGGCGGGGC TGCTGGCGGG GGACCGGCTG GTGGAGGTGA ACGGCGAAAA<br/> 781 CGTGGAGAAG GAGACCCACC AGCAGGTGGT GAGCCGCATC CGCGCCGCAC TCAACGCCGT<br/> 841 GCGCCTGCTG GTGGTCGACC CCGAGACGGA CGAGCAGCTG CAGAAGCTCG GCGTCCAGGT<br/> 901 CCGAGAGGAG CTGCTGCGCG CCCAGGAAGC GCCGGGGCAG GCCGAGCCGC CGGCCGCCGC<br/> 961 CGAGGTGCAG GGGGCTGGCA ACGAAAATGA GCCTCGCGAG GCCGACAAGA GCCACCCGGA<br/> 1021 GTGAAAGCTT GCGGCCGCAC TCGAGCACCA CCACCACCAC CAC</p> |
| <p><b>pET32</b><br/><br/> <b>-Trx-His-PDZ2</b></p> | <p>1 TAATACGACT CACTATAGGG GAATTGTGAG CGGATAACAA TTCCCCTCTA GAAATAATTT<br/> 61 TGTTTAACTT TAAGAAGGAG ATATACATAT GAGCGATAAA ATTATTCACC TGA CTGACGA<br/> 121 CAGTTTTGAC ACGGATGTAC TCAAAGCGGA CGGGGCGATC CTCGTCGATT TCTGGGCAGA<br/> 181 GTGGTGCGGT CCGTGCAAAA TGATCGCCCC GATTCTGGAT GAAATCGCTG ACGAATATCA<br/> 241 GGGCAA ACTG ACCGTTGCAA AACTGAACAT CGATCAA AAC CCTGGCACTG CGCCGAAATA<br/> 301 TGGCATCCGT GGTATCCCGA CTCTGCTGCT GTTCAAAAAC GGTGAAGTGG CGGCAACCAA<br/> 361 AGTGGGTGCA CTGTCTAAAG GTCAGTTGAA AGAGTTCCTC GACGCTAACC TGGCCGGTTC<br/> 421 TGGTTCTGGC CATATGCACC ATCATCATCA TCATTCTTCT GGTCTGGTGC CACGCGGTTC</p>                                                                                                                                                                                                                                                                                                                                                                                                                                                                                                                                                                                                                                                                                                                                                               |

|                         |                                                                                                                                                                                                                                                                                                                                                                                                                                                                                                                                                                                                                                                                                                                                                                                                                                                                                                                                                                                                                                                                                                                                                                                                                                                                                                                                                                                                                                                                                                                                                                                                                                                                                                                                                                                                                                                                                                                                                        |
|-------------------------|--------------------------------------------------------------------------------------------------------------------------------------------------------------------------------------------------------------------------------------------------------------------------------------------------------------------------------------------------------------------------------------------------------------------------------------------------------------------------------------------------------------------------------------------------------------------------------------------------------------------------------------------------------------------------------------------------------------------------------------------------------------------------------------------------------------------------------------------------------------------------------------------------------------------------------------------------------------------------------------------------------------------------------------------------------------------------------------------------------------------------------------------------------------------------------------------------------------------------------------------------------------------------------------------------------------------------------------------------------------------------------------------------------------------------------------------------------------------------------------------------------------------------------------------------------------------------------------------------------------------------------------------------------------------------------------------------------------------------------------------------------------------------------------------------------------------------------------------------------------------------------------------------------------------------------------------------------|
|                         | <p>481 TGGTATGAAA GAAACCGCTG CTGCTAAATT CGAACGCCAG CACATGGACA GCCCAGATCT<br/> 541 GGGTACCGAC GACGACGACA AGGCCATGGC TGATATCGGA TCCCAGCGCG AGCTTCGGCC<br/> 601 TCGGCTCTGT ACCATGAAGA AGGGCCCCAG TGGCTATGGC TTCAACCTGC ACAGCGACAA<br/> 661 GTCCAAGCCA GGCCAGTTCA TCCGGTCAGT GGACCCAGAC TCCCCGGCTG AGGCTTCAGG<br/> 721 GCTCCGGGCC CAGGATCGCA TTGTGGAGGT GAACGGGGTC TGCATGGAGG GGAAGCAGCA<br/> 781 TGGGGACGTG GTGTCCGCCA TCAGGGCTGG CGGGGACGAG ACCAAGCTGC TGGTGGTGG<br/> 841 CAGGGAACT GACGAGTTCT TCAAGAAATG CAGAGTGATC CCATCTCAGG AGCACCTGAA<br/> 901 TGGTCCCCTG CCTGTGCCCT TCACCAATGG GGAGATACAG AAGGAGAACA GTCGTGAAGC<br/> 961 CCTGGCAGAG GCAGCCTTGG AGAGCCCCAG GCCAGCCCTG GTGAGATCCG CCTCCAGTGA<br/> 1021 CACCAGCGAG GAGCTGAATT CCCAAGACAG CCCCCAAAA CAGGACTCCA CAGCGCCCTC<br/> 1081 GTCTACCTCC TCCTGAAAGC TTGCGGCCGC ACTCGAGCAC CACCACCACC ACCAC</p>                                                                                                                                                                                                                                                                                                                                                                                                                                                                                                                                                                                                                                                                                                                                                                                                                                                                                                                                                                                                                                                                                                   |
| <b>GST-β-catenin-C'</b> | <p>1 ACGTTATCGA CTGCACGGTG CACCAATGCT TCTGGCGTCA GGCAGCCATC GGAAGCTGTG<br/> 61 GTATGGCTGT GCAGGTCGTA AATCACTGCA TAATTCGTGT CGCTCAAGGC GCACTCCCGT<br/> 121 TCTGGATAAT GTTTTTTGCG CCGACATCAT AACGGTTCTG GCAAATATTC TGAAATGAGC<br/> 181 TGTTGACAAT TAATCATCGG CTCGTATAAT GTGTGGAATT GTGAGCGGAT AACAAATTTCA<br/> 241 CACAGGAAAC AGTATTCATG TCCCCTATAC TAGGTTATTG GAAAATTAAG GGCCTTGTGC<br/> 301 AACCCACTCG ACTTCTTTTG GAATATCTTG AAGAAAAATA TGAAGAGCAT TTGTATGAGC<br/> 361 GCGATGAAGG TGATAAATGG CGAAACAAAA AGTTTGAATT GGGTTTGGAG TTTCCCAATC<br/> 421 TTCCTTATTA TATTGATGGT GATGTTAAAT TAACACAGTC TATGGCCATC ATACGTTATA<br/> 481 TAGCTGACAA GCACAACATG TTGGGTGGTT GTCCAAAAGA GCGTGCAGAG ATTTCAATGC<br/> 541 TTGAAGGAGC GGTTTTGGAT ATTAGATACG GTGTTTCGAG AATTGCATAT AGTAAAGACT<br/> 601 TTGAAACTCT CAAAGTTGAT TTTCTTAGCA AGCTACCTGA AATGCTGAAA ATGTTGGAAG<br/> 661 ATCGTTTATG TCATAAAACA TATTTAAATG GTGATCATGT AACCCATCCT GACTTCATGT<br/> 721 TGTATGACGC TCTTGATGTT GTTTTATACA TGGACCCAAT GTGCCTGGAT GCGTTCCCAA<br/> 781 AATTAGTTTG TTTTAAAAAA CGTATTGAAG CTATCCACA AATTGATAAG TACTTGAAAT<br/> 841 CCAGCAAGTA TATAGCATGG CCTTTGCAGG GCTGGCAAGC CACGTTTGGT GGTGGCGACC<br/> 901 ATCCTCCAAA ATCGGATCTG GTTCCGCGTG GATCCATGGC TACTCAAGCT GACCTGATGG<br/> 961 AGTTGGACAT GGCCATGGGT GGAACGCAGC AGCAGTTTGT GGAGGGCGTG CGCATGGAGG<br/> 1021 AGATAGTAGA AGGGTGTACT GGAGCTCTCC ACATCCTTGC TCGGGACGTT CACAACCGGA<br/> 1081 TTGTAATCCG AGGACTCAAT ACCATTCCAT TGTTTGTGCA GTTGCTTTAT TCTCCATTG<br/> 1141 AAAATATCCA AAGAGTAGCT GCAGGGGTCC TCTGTGAACT TGCTCAGGAC AAGGAGGCTG<br/> 1201 CAGAGGCCAT TGAAGCTGAG GGAGCCACAG CTCCCCTGAC AGAGTTACTC CACTCCAGGA<br/> 1261 ATGAAGGCGT GGCAACATAC GCAGCTGCTG TCCTATTCCG AATGTCTGAG GACAAGCCAC<br/> 1321 AGGATTACAA GAAGCGGCTT TCAGTCGAGC TGACCAGTTC CCTCTTCAGG ACAGAGCCAA<br/> 1381 TGGCTTGGAA TGAGACTGCA GATCTTGGAC TGGACATTGG TGCCAGGGA GAAGCCCTTG<br/> 1441 GATATCGCCA GGATGATCCC AGCTACCGTT CTTTTACTC TGGTGGATAC GGCCAGGATG</p> |

|                                                                        |
|------------------------------------------------------------------------|
| 1501 CCTTGGGGAT GGACCCTATG ATGGAGCATG AGATGGGTGG CCACCACCCT GGTGCTGACT |
| 1561 ATCCAGTTGA TGGGCTGCCT GATCTGGGAC ACGCCCAGGA CCTCATGGAT GGGCTGCCCC |
| 1621 CAGGTGATAG CAATCAGCTG GCCTGGTTTG AACTGACCT GTAAATCGTC CTTTAGGTAA  |
| 1681 GAAAGCTGGA AATCGGAATT CCTGTGACTG ACGATCTGCC TCGCGGTTT CGGTGATGAC  |
| 1741 GGTGAAAACC TCTGACACAT GCAGCTCCCG GAGACGGTCA CAGCTTGTCT GTAAGCGGAT |

Supplementary Table 5. Synthetic oligonucleotides used in ChIP and RT-PCR assays

| <b>ChIP</b>      |         |                           |
|------------------|---------|---------------------------|
| <b>c-Myc</b>     | forward | GTGAATACACGTTTGCGGGTTAC   |
|                  | reverse | AGAGACCCTTGTGAAAAAACCG    |
| <b>MMP2</b>      | forward | GAGGTCGCTTTCTTTGCCATCT    |
|                  | reverse | AGCGACTCCATCTTGAACAGG     |
| <b>EDAR</b>      | forward | TGTGCCCTCCATAAGACTCC      |
|                  | reverse | GCAGAACATGGTTGGGTGAAGG    |
| <b>FRAS1</b>     | forward | CCTGAGCAAGAACTGTGCAACC    |
|                  | reverse | GCCTCCTTCCTCTCTGCTTTG     |
| <b>cyclin D1</b> | forward | CGTCCCATTCTCTGCCGG        |
|                  | reverse | GGGGCTCTTCCTGGGCAGC       |
| <b>BIRC5</b>     | forward | GGGGCGCTAGGTGTGGG         |
|                  | reverse | TTCAAATCTGGCGGTTAATGGC    |
| <b>EDN1</b>      | forward | GGCAGAGAGCTGTCCAAGTC      |
|                  | reverse | CGGGTTCCTCAGATCTCAA       |
| <b>GAPDH</b>     | forward | TAGGCCTTTGCCTGAGCAGTCCGG  |
|                  | reverse | TTGAGGCCTGAGCTACGTGCGCCC  |
| <b>RT-PCR</b>    |         |                           |
| <b>c-Myc</b>     | forward | GCGACTCTGAGGAGGAACA       |
|                  | reverse | TGTCCAACCTTGACCCTCTTG     |
| <b>cyclin D1</b> | forward | CGTCCATGCGGAAGATCGT       |
|                  | reverse | TGGAAATGAACTTCACATCTGTGGC |
| <b>EBP50</b>     | forward | ATCGCATTG TGGAGGTGA       |
|                  | reverse | TTTGCTGCTGCGTTTCT         |
| <b>GAPDH</b>     | forward | CTGATGCCCCCATGTTCGTC      |
|                  | reverse | CACCCTGTTGCTGTAGCCAAATT   |
